# Supplementary material for: Facile synthesis of 2-vinylindolines via a phosphine-mediated α-umpolung/Wittig olefination/cyclization cascade process
Source: Royal Society of Chemistry journal article supplement (doi:10.1039/d4cc01851f), 2024-01-01

## Supporting Information

### Facile synthesis of 2-vinylindolines *via* a phosphine-mediated $\alpha$ -umpolung/Wittig olefination/cyclization cascade process

Shuhui Li<sup>a,†</sup>, Dan Xu<sup>a,†</sup>, Hui Yao<sup>a,b,\*</sup>, Mengting Tan<sup>a</sup>, Xiaoxuan Li<sup>a</sup>, Mingguo Liu<sup>a</sup>, Long Wang<sup>b,c</sup>, Nianyu Huang<sup>a,b,\*</sup>, and Nengzhong Wang<sup>a,b,\*</sup>

<sup>a</sup>Hubei Key Laboratory of Natural Products Research and Development, College of Biological and Pharmaceutical Sciences, China Three Gorges University, Yichang Hubei 443002, China.

<sup>b</sup>Hubei Three Gorges Laboratory, Yichang Hubei 443007, China

<sup>c</sup>College of Materials and Chemical Engineering, Key Laboratory of Inorganic Nonmetallic Crystalline and Energy Conversion Materials, China Three Gorges University, Yichang Hubei 443002, China.

<sup>†</sup>These authors contributed equally to this work.

\*Corresponding authors. E-mail: [yaohui@ctgu.edu.cn](mailto:yaohui@ctgu.edu.cn), [huangny@ctgu.edu.cn](mailto:huangny@ctgu.edu.cn), [wangnz@ctgu.edu.cn](mailto:wangnz@ctgu.edu.cn)

#### Table of Contents

|              |                                                                                    |            |
|--------------|------------------------------------------------------------------------------------|------------|
| <b>I.</b>    | <b>General Information.....</b>                                                    | <b>S2</b>  |
| <b>II.</b>   | <b>Representative Procedure of the Reaction .....</b>                              | <b>S3</b>  |
| <b>III.</b>  | <b>Analytical Data .....</b>                                                       | <b>S5</b>  |
| <b>IV.</b>   | <b>Gram-Scale and Synthetic Manipulations.....</b>                                 | <b>S17</b> |
| <b>V.</b>    | <b>Mechanistic Studies .....</b>                                                   | <b>S21</b> |
| <b>VI.</b>   | <b>References.....</b>                                                             | <b>S24</b> |
| <b>VII.</b>  | <b>X-Ray Crystallographic Analysis .....</b>                                       | <b>S25</b> |
| <b>VIII.</b> | <b>Copies of <sup>1</sup>H and <sup>13</sup>C{<sup>1</sup>H} NMR Spectra .....</b> | <b>S29</b> |

## I. General Information

Unless otherwise specified, **all reactions** were carried out under a nitrogen atmosphere at room temperature. **All solvents** were purified according to the standard procedures. **All chemicals** which are commercially available were employed without further purification. **Thin-layer chromatography (TLC)** was performed on silica gel plates (GF254) using UV-light (254 and 365 nm). **Flash chromatography** was conducted on silica gel (200–300 mesh).  **$^1\text{H}$  and  $^{13}\text{C}\{^1\text{H}\}$  NMR spectra** were recorded on a Bruker 400 MHz spectrometer. **Chemical shifts** were reported in parts per million (ppm). The  **$^1\text{H}$  NMR (400 MHz)** chemical shifts were measured relative to residual non-deuterated solvent resonance ( $\text{CDCl}_3$ :  $\delta = 7.260$  ppm,  $(\text{CD}_3)_2\text{CO}$ :  $\delta = 2.050$  ppm). The  **$^{13}\text{C}\{^1\text{H}\}$  NMR (100 MHz)** chemical shifts were given using  $\text{CDCl}_3$  or  $(\text{CD}_3)_2\text{CO}$  as the internal standard ( $\text{CDCl}_3$ :  $\delta = 77.00$  ppm,  $(\text{CD}_3)_2\text{CO}$ :  $\delta = 29.84$  ppm). **All high-resolution mass spectra (HR-MS)** were obtained on a Fourier Transform Ion Cyclotron Resonance (FT-ICR) mass spectrometer solariX (Bruker Daltonik GmbH, Bremen, Germany). **Crystal measurement** was performed by Bruker D8 Venture X-ray diffractionmeter.

## II. Representative Procedure of the Reaction

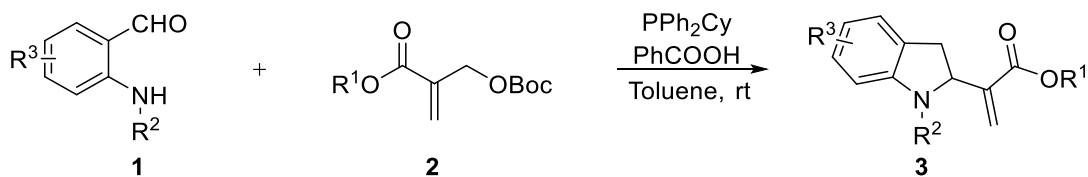

To a stirred solution of *o*-aminobenzaldehyde **1** (0.1 mmol, 1.0 equiv) and allyl carbonate **2** (0.15 mmol, 1.5 equiv) in toluene (2.0 mL) was added  $PPh_2Cy$  (0.12 mmol, 1.2 equiv) and benzoic acid (20 mol %) at room temperature. After the reaction of the raw material, the reaction mixture was purified without concentration via flash chromatography on silica gel (PE:EtOAc:DCM = 19:1:6) to afford compounds **3**.

Table S1. Optimization of the reaction conditions.<sup>a</sup>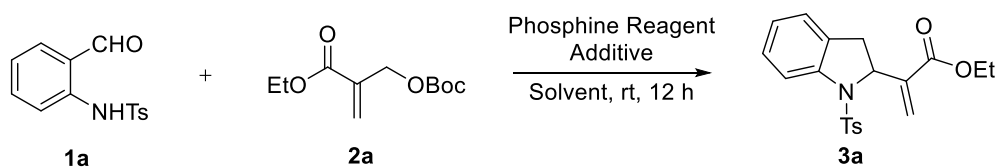

| Entry           | Phosphine                                           | Solvent        | Additive                                           | Yield [%] <sup>b</sup> |
|-----------------|-----------------------------------------------------|----------------|----------------------------------------------------|------------------------|
| 1               | PPh <sub>3</sub>                                    | toluene        | -                                                  | N.D.                   |
| 2               | (2-MeC <sub>6</sub> H <sub>4</sub> ) <sub>3</sub> P | toluene        | -                                                  | N.R.                   |
| 3               | Ph <sub>2</sub> MeP                                 | toluene        | -                                                  | trace                  |
| 4               | Ph <sub>2</sub> PrP                                 | toluene        | -                                                  | trace                  |
| 5               | Ph <sub>2</sub> CyP                                 | toluene        | -                                                  | 30                     |
| 6               | PhMe <sub>2</sub> P                                 | toluene        | -                                                  | N.D.                   |
| 7               | PhCy <sub>2</sub> P                                 | toluene        | -                                                  | N.D.                   |
| 8               | PBu <sub>3</sub>                                    | toluene        | -                                                  | trace                  |
| 9               | (MeO) <sub>3</sub> P                                | toluene        | -                                                  | N.D.                   |
| 10              | (EtO) <sub>3</sub> P                                | toluene        | -                                                  | N.D.                   |
| 11              | PPh <sub>2</sub> Cy                                 | DCM            | -                                                  | 20                     |
| 12              | PPh <sub>2</sub> Cy                                 | THF            | -                                                  | trace                  |
| 13              | PPh <sub>2</sub> Cy                                 | MeCN           | -                                                  | N.R.                   |
| 14              | PPh <sub>2</sub> Cy                                 | toluene        | C <sub>6</sub> H <sub>5</sub> OH                   | 28                     |
| 15              | PPh <sub>2</sub> Cy                                 | toluene        | 4-NO <sub>2</sub> C <sub>6</sub> H <sub>4</sub> OH | 41                     |
| 16              | <b>PPh<sub>2</sub>Cy</b>                            | <b>toluene</b> | <b>PhCO<sub>2</sub>H</b>                           | <b>88</b>              |
| 17              | PPh <sub>2</sub> Cy                                 | toluene        | CH <sub>3</sub> CO <sub>2</sub> H                  | 53                     |
| 18              | PPh <sub>2</sub> Cy                                 | toluene        | CH <sub>3</sub> CO <sub>2</sub> Na                 | 26                     |
| 19              | PPh <sub>2</sub> Cy                                 | toluene        | PhCO <sub>2</sub> Na                               | 31                     |
| 20              | PPh <sub>2</sub> Cy                                 | toluene        | NaHCO <sub>3</sub>                                 | 17                     |
| 21              | PPh <sub>2</sub> Cy                                 | toluene        | KHCO <sub>3</sub>                                  | 22                     |
| 22 <sup>c</sup> | PPh <sub>2</sub> Cy                                 | toluene        | PhCO <sub>2</sub> H                                | 58                     |
| 23 <sup>d</sup> | PPh <sub>2</sub> Cy                                 | toluene        | PhCO <sub>2</sub> H                                | 49                     |

<sup>a</sup>Unless otherwise stated, all reactions were performed with **1a** (0.1 mmol), **2a** (0.15 mmol), the phosphine reagent (0.12 mmol) and the additive (20 mol%) in the solvent specified (2.0 mL) at room temperature. <sup>b</sup>Isolated yield. <sup>c</sup>The additive (10 mol%) in the solvent specified (2.0 mL). <sup>d</sup>The additive (30 mol%) in the solvent specified (2.0 mL).



### III. Analytical Data

#### *Ethyl 2-(1-tosylindolin-2-yl)acrylate (3a)*

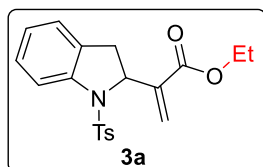

The **3a** was prepared according to the general procedure described above using **1a** (27.5 mg, 0.1 mmol), **2a** (34.5 mg, 0.15 mmol), PPh<sub>2</sub>Cy (32.2 mg, 1.2 equiv), PhCOOH (2.4 mg, 0.2 equiv) and isolated as a yellow oily liquid (32.5 mg, 88% yield) after flash column chromatography on silica gel (PE:EtOAc:DCM = 19:1:6). **<sup>1</sup>H NMR (400 MHz, CDCl<sub>3</sub>)**  $\delta$  7.73 (d,  $J$  = 8.1 Hz, 1H), 7.60 – 7.55 (m, 2H), 7.25 – 7.20 (m, 1H), 7.18 (d,  $J$  = 8.1 Hz, 2H), 7.05 – 6.97 (m, 2H), 6.34 (s, 1H), 6.04 (s, 1H), 5.16 – 5.11 (m, 1H), 4.30 – 4.16 (m, 2H), 3.10 (dd,  $J$  = 16.5, 10.2 Hz, 1H), 2.61 (dd,  $J$  = 16.5, 3.0 Hz, 1H), 2.36 (s, 3H), 1.29 (t,  $J$  = 7.1 Hz, 3H). **<sup>13</sup>C{<sup>1</sup>H} NMR (100 MHz, CDCl<sub>3</sub>)**  $\delta$  165.8, 144.1, 141.6, 140.1, 134.7, 131.1, 129.7, 127.9, 127.1, 125.7, 125.2, 124.9, 117.0, 61.3, 61.0, 36.2, 21.5, 14.1. **HRMS (ESI)**  $m/z$ : calcd. for C<sub>20</sub>H<sub>21</sub>NO<sub>4</sub>SNa<sup>+</sup> [M+Na]<sup>+</sup>: 394.1083, found 394.1098.

#### *Isopropyl 2-(1-tosylindolin-2-yl)acrylate (3b)*

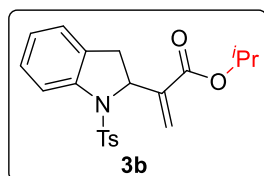

The **3b** was prepared according to the general procedure described above using **1a** (27.5 mg, 0.1 mmol), **2b** (36.6 mg, 0.15 mmol), PPh<sub>2</sub>Cy (32.2 mg, 1.2 equiv), PhCOOH (2.4 mg, 0.2 equiv) and isolated as a yellow oily liquid (32.4 mg, 84% yield) after flash column chromatography on silica gel (PE:EtOAc:DCM = 19:1:6). **<sup>1</sup>H NMR (400 MHz, CDCl<sub>3</sub>)**  $\delta$  7.72 (d,  $J$  = 8.1 Hz, 1H), 7.60 – 7.55 (m, 2H), 7.26 – 7.20 (m, 1H), 7.18 (d,  $J$  = 8.1 Hz, 2H), 7.05 – 6.98 (m, 2H), 6.31 (s, 1H), 6.01 (s, 1H), 5.16 – 5.11 (m, 1H), 5.11 – 5.03 (m, 1H), 3.09 (dd,  $J$  = 16.5, 10.2 Hz, 1H), 2.61 (dd,  $J$  = 16.5, 3.1 Hz, 1H), 2.36 (s, 3H), 1.26 (dd,  $J$  = 6.3, 2.9 Hz, 6H). **<sup>13</sup>C{<sup>1</sup>H} NMR (100 MHz, CDCl<sub>3</sub>)**  $\delta$  165.3, 144.0, 141.6, 140.4, 134.8, 131.2, 129.6, 127.8, 127.1, 125.4, 125.2, 124.9, 117.0, 68.5, 61.4, 36.2, 21.78, 21.75, 21.5. **HRMS (ESI)**  $m/z$ : calcd. for C<sub>21</sub>H<sub>23</sub>NO<sub>4</sub>SNa<sup>+</sup> [M+Na]<sup>+</sup>: 408.1240, found 408.1234.

### Butyl 2-(1-tosylindolin-2-yl)acrylate (**3c**)

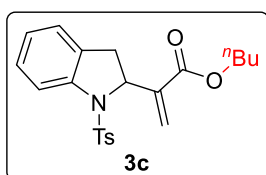

The **3c** was prepared according to the general procedure described above using **1a** (27.5 mg, 0.1 mmol), **2c** (38.7 mg, 0.15 mmol), PPh<sub>2</sub>Cy (32.2 mg, 1.2 equiv), PhCOOH (2.4 mg, 0.2 equiv) and isolated as a yellow oily liquid (33.7 mg, 85% yield) after flash column chromatography on silica gel (PE:EtOAc:DCM = 19:1:6). **<sup>1</sup>H NMR (400 MHz, CDCl<sub>3</sub>)**  $\delta$  7.73 (d,  $J$  = 8.1 Hz, 1H), 7.60 – 7.54 (m, 2H), 7.26 – 7.21 (m, 1H), 7.18 (d,  $J$  = 8.0 Hz, 2H), 7.06 – 6.98 (m, 2H), 6.33 (s, 1H), 6.03 (s, 1H), 5.17 – 5.11 (m, 1H), 4.23 – 4.12 (m, 2H), 3.09 (dd,  $J$  = 16.6, 10.2 Hz, 1H), 2.61 (dd,  $J$  = 16.6, 3.1 Hz, 1H), 2.36 (s, 3H), 1.69 – 1.62 (m, 2H), 1.43 – 1.37 (m, 2H), 0.94 (t,  $J$  = 7.4 Hz, 3H). **<sup>13</sup>C{<sup>1</sup>H} NMR (100 MHz, CDCl<sub>3</sub>)**  $\delta$  165.8, 144.1, 141.6, 140.1, 134.6, 131.1, 129.6, 127.8, 127.1, 125.6, 125.2, 124.9, 117.0, 64.8, 61.3, 36.2, 30.6, 21.5, 19.2, 13.7. **HRMS (ESI)**  $m/z$ : calcd. for C<sub>22</sub>H<sub>25</sub>NO<sub>4</sub>SNa<sup>+</sup> [M+Na]<sup>+</sup>: 422.1397, found 422.1381.

### Tert-Butyl 2-(1-tosylindolin-2-yl)acrylate (**3d**)

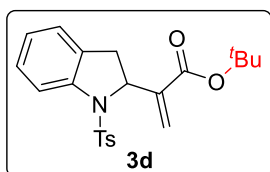

The **3d** was prepared according to the general procedure described above using **1a** (27.5 mg, 0.1 mmol), **2d** (38.7 mg, 0.15 mmol), PPh<sub>2</sub>Cy (32.2 mg, 1.2 equiv), PhCOOH (2.4 mg, 0.2 equiv) and isolated as a yellow oily liquid (34.7 mg, 87% yield) after flash column chromatography on silica gel (PE:EtOAc:DCM = 19:1:6). **<sup>1</sup>H NMR (400 MHz, CDCl<sub>3</sub>)**  $\delta$  7.72 (d,  $J$  = 8.2 Hz, 1H), 7.60 – 7.53 (m, 2H), 7.25 – 7.20 (m, 1H), 7.17 (d,  $J$  = 8.0 Hz, 2H), 7.05 – 6.97 (m, 2H), 6.22 (s, 1H), 5.96 (s, 1H), 5.16 – 5.08 (m, 1H), 3.05 (dd,  $J$  = 16.6, 10.2 Hz, 1H), 2.59 (dd,  $J$  = 16.6, 3.0 Hz, 1H), 2.35 (s, 3H), 1.48 (s, 9H). **<sup>13</sup>C{<sup>1</sup>H} NMR (100 MHz, CDCl<sub>3</sub>)**  $\delta$  165.0, 144.0, 141.6, 141.3, 134.7, 131.3, 129.6, 127.8, 127.1, 125.2, 124.9, 124.8, 117.1, 81.4, 61.4, 36.2, 28.1, 21.5. **HRMS (ESI)**  $m/z$ : calcd. for C<sub>22</sub>H<sub>25</sub>NO<sub>4</sub>SNa<sup>+</sup> [M+Na]<sup>+</sup>: 422.1397, found 422.1409.

### Cyclohexyl 2-(1-tosylindolin-2-yl)acrylate (**3e**)

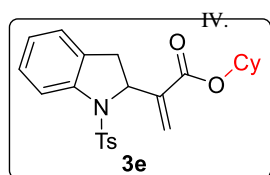

The **3e** was prepared according to the general procedure described above using **1a** (27.5 mg, 0.1 mmol), **2e** (42.6 mg, 0.15 mmol), PPh<sub>2</sub>Cy (32.2 mg, 1.2 equiv), PhCOOH (2.4 mg, 0.2 equiv) and isolated as a yellow oily liquid (22.4 mg, 53% yield) after flash column

chromatography on silica gel (PE:EtOAc:DCM = 19:1:6). **<sup>1</sup>H NMR (400 MHz, CDCl<sub>3</sub>)** δ 7.73 (d, *J* = 8.1 Hz, 1H), 7.62 – 7.53 (m, 2H), 7.25 – 7.20 (m, 1H), 7.18 (d, *J* = 8.1 Hz, 2H), 7.07 – 6.96 (m, 2H), 6.32 (s, 1H), 6.01 (s, 1H), 5.20 – 5.08 (m, 1H), 4.93 – 4.81 (m, 1H), 3.08 (dd, *J* = 16.6, 10.2 Hz, 1H), 2.62 (dd, *J* = 16.6, 3.1 Hz, 1H), 2.36 (s, 3H), 1.89 – 1.68 (m, 4H), 1.56 – 1.36 (m, 6H). **<sup>13</sup>C{<sup>1</sup>H} NMR (100 MHz, CDCl<sub>3</sub>)** δ 165.1, 144.0, 141.6, 140.5, 134.7, 131.2, 129.6, 127.8, 127.1, 125.4, 125.2, 124.9, 117.0, 73.2, 61.4, 36.2, 31.5, 25.4, 23.6, 21.6. **HRMS (ESI)** *m/z*: calcd. for C<sub>24</sub>H<sub>27</sub>NO<sub>4</sub>SNa<sup>+</sup> [M+Na]<sup>+</sup>: 448.1553, found 448.1551.

### *Benzyl 2-(1-tosylindolin-2-yl)acrylate (3f)*

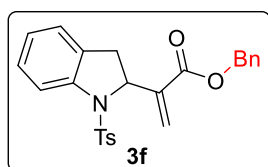

The **3f** was prepared according to the general procedure described above using **1a** (27.5 mg, 0.1 mmol), **2f** (43.9 mg, 0.15 mmol), PPh<sub>2</sub>Cy (32.2 mg, 1.2 equiv), PhCOOH (2.4 mg, 0.2 equiv) and isolated as a yellow oily liquid (20.2 mg, 46% yield) after flash column chromatography on silica gel (PE:EtOAc:DCM = 19:1:6). **<sup>1</sup>H NMR (400 MHz, CDCl<sub>3</sub>)** δ 7.74 (d, *J* = 8.1 Hz, 1H), 7.57 (d, *J* = 8.4 Hz, 2H), 7.44 – 7.30 (m, 5H), 7.26 – 7.20 (m, 1H), 7.17 (d, *J* = 8.1 Hz, 2H), 7.05 – 6.97 (m, 2H), 6.40 (s, 1H), 6.08 (s, 1H), 5.22 (d, *J* = 3.0 Hz, 2H), 5.19 – 5.14 (m, 1H), 3.09 (dd, *J* = 16.6, 10.2 Hz, 1H), 2.62 (dd, *J* = 16.6, 3.1 Hz, 1H), 2.36 (s, 3H). **<sup>13</sup>C{<sup>1</sup>H} NMR (100 MHz, CDCl<sub>3</sub>)** δ 165.6, 144.1, 141.5, 139.9, 135.6, 134.6, 131.0, 129.6, 128.6, 128.3, 128.1, 127.8, 127.1, 126.2, 125.2, 124.9, 117.0, 66.7, 61.2, 36.2, 21.5. **HRMS (ESI)** *m/z*: calcd. for C<sub>25</sub>H<sub>23</sub>NO<sub>4</sub>SNa<sup>+</sup> [M+Na]<sup>+</sup>: 456.1240, found 456.1241.

### *Ethyl 2-(1-((4-nitrophenyl)sulfonyl)indolin-2-yl)acrylate (3g)*

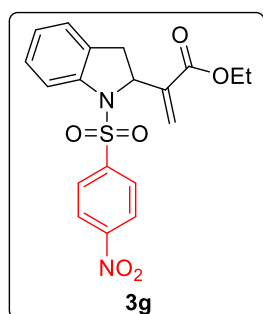

The **3g** was prepared according to the general procedure described above using **1b** (30.6 mg, 0.1 mmol), **2a** (34.5 mg, 0.15 mmol), PPh<sub>2</sub>Cy (32.2 mg, 1.2 equiv), PhCOOH (2.4 mg, 0.2 equiv) and isolated as a yellow oily liquid (25.2 mg, 63% yield) after flash column chromatography on silica gel

(PE:EtOAc:DCM = 19:1:6).  $^1\text{H NMR}$  (400 MHz,  $\text{CDCl}_3$ )  $\delta$  8.25 (d,  $J = 8.7$  Hz, 2H), 7.90 (d,  $J = 8.7$  Hz, 2H), 7.74 (d,  $J = 8.1$  Hz, 1H), 7.31 – 7.26 (m, 1H), 7.11 – 7.01 (m, 2H), 6.36 (s, 1H), 6.01 (s, 1H), 5.16 (d,  $J = 7.8$  Hz, 1H), 4.32 – 4.15 (m, 2H), 3.12 (dd,  $J = 16.7, 10.2$  Hz, 1H), 2.68 (dd,  $J = 16.7, 3.0$  Hz, 1H), 1.30 (t,  $J = 7.1$  Hz, 3H).  $^{13}\text{C}\{^1\text{H}\}$  NMR (100 MHz,  $\text{CDCl}_3$ )  $\delta$  165.5, 150.4, 143.2, 140.6, 139.7, 130.9, 128.3, 128.2, 125.8, 125.67, 125.65, 124.3, 116.6, 61.6, 61.2, 36.2, 14.1. HRMS (ESI)  $m/z$ : calcd. for  $\text{C}_{19}\text{H}_{18}\text{N}_2\text{O}_6\text{SNa}^+ [\text{M}+\text{Na}]^+$ : 425.0778, found 425.0787.

**Ethyl 2-(1-((2-bromophenyl)sulfonyl)indolin-2-yl)acrylate (3h)**

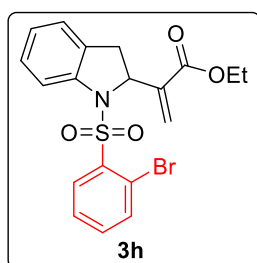

The **3h** was prepared according to the general procedure described above using **1c** (33.9 mg, 0.1 mmol), **2a** (34.5 mg, 0.15 mmol),  $\text{PPh}_2\text{Cy}$  (32.2 mg, 1.2 equiv),  $\text{PhCOOH}$  (2.4 mg, 0.2 equiv) and isolated as a yellow solid (23.9 mg, 55% yield) after flash column chromatography on silica gel

(PE:EtOAc:DCM = 19:1:6). m.p.: 121.0 – 122.5 °C.  $^1\text{H NMR}$  (400 MHz,  $\text{CDCl}_3$ )  $\delta$  8.22 (dd,  $J = 7.9, 1.7$  Hz, 1H), 7.66 (d,  $J = 7.7$  Hz, 1H), 7.47 – 7.41 (m, 1H), 7.39 – 7.33 (m, 1H), 7.28 (s, 1H), 7.12 – 7.04 (m, 2H), 6.97 – 6.91 (m, 1H), 6.32 (s, 1H), 6.02 (d,  $J = 1.4$  Hz, 1H), 5.75 (d,  $J = 10.0$  Hz, 1H), 4.32 – 4.17 (m, 2H), 3.62 (dd,  $J = 16.3, 10.0$  Hz, 1H), 2.81 (dd,  $J = 16.3, 2.0$  Hz, 1H), 1.30 (t,  $J = 7.1$  Hz, 3H).  $^{13}\text{C}\{^1\text{H}\}$  NMR (100 MHz,  $\text{CDCl}_3$ )  $\delta$  165.6, 140.7, 139.8, 138.0, 135.7, 134.0, 133.3, 129.9, 127.5, 127.4, 125.6, 125.3, 123.9, 120.1, 114.2, 63.1, 61.0, 36.0, 14.1. HRMS (ESI)  $m/z$ : calcd. for  $\text{C}_{19}\text{H}_{18}\text{BrNO}_4\text{SNa}^+ [\text{M}+\text{Na}]^+$ : 458.0032, found 458.0038.

**Ethyl 2-(1-((3-bromophenyl)sulfonyl)indolin-2-yl)acrylate (3i)**

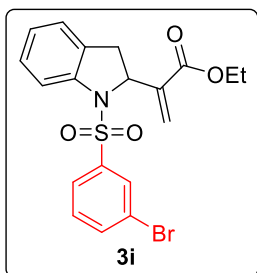

The **3i** was prepared according to the general procedure described above using **1d** (33.9 mg, 0.1 mmol), **2a** (34.5 mg, 0.15 mmol),  $\text{PPh}_2\text{Cy}$  (32.2 mg, 1.2 equiv),  $\text{PhCOOH}$  (2.4 mg, 0.2 equiv) and isolated as a yellow solid (24.0 mg, 55% yield) after flash column chromatography on silica gel

(PE:EtOAc:DCM = 19:1:6). m.p.: 33.8 – 34.5 °C.  $^1\text{H NMR}$  (400 MHz,  $\text{CDCl}_3$ )  $\delta$  7.85 (t,  $J = 1.8$  Hz, 1H), 7.71 (d,  $J = 8.1$  Hz, 1H), 7.67 – 7.59 (m, 2H), 7.28 (d,  $J = 7.9$  Hz, 1H), 7.26 – 7.22 (m, 1H), 7.09 – 7.01 (m, 2H), 6.34 (s, 1H), 6.01 (s, 1H), 5.18 – 5.12 (m, 1H), 4.31 – 4.16 (m, 2H), 3.16 (dd,  $J = 16.6, 10.2$  Hz, 1H), 2.67 (dd,  $J = 16.7, 3.0$  Hz, 1H), 1.29 (t,  $J = 7.1$  Hz, 3H).  $^{13}\text{C}\{^1\text{H}\}$  NMR (100 MHz,  $\text{CDCl}_3$ )  $\delta$  165.6, 141.0, 139.9, 139.5, 136.2, 130.9, 130.5, 130.0, 128.0, 125.7, 125.5, 125.4, 125.3, 123.0, 116.6, 61.5, 61.0, 36.2, 14.1. HRMS (ESI)  $m/z$ : calcd. for  $\text{C}_{19}\text{H}_{18}\text{BrNO}_4\text{SNa}^+ [\text{M}+\text{Na}]^+$ : 458.0032, found 458.0031.

### Ethyl 2-(1-(phenylsulfonyl)indolin-2-yl)acrylate (3j)

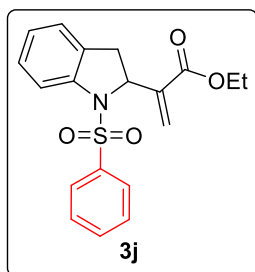

The **3j** was prepared according to the general procedure described above using **1e** (26.1 mg, 0.1 mmol), **2a** (34.5 mg, 0.15 mmol),  $\text{PPh}_2\text{Cy}$  (32.2 mg, 1.2 equiv),  $\text{PhCOOH}$  (2.4 mg, 0.2 equiv) and isolated as a yellow solid (23.6 mg, 66% yield) after flash column chromatography on silica gel

(PE:EtOAc:DCM = 19:1:6). m.p.: 128.0 – 131.0 °C.  $^1\text{H NMR}$  (400 MHz,  $\text{CDCl}_3$ )  $\delta$  7.75 (d,  $J = 8.1$  Hz, 1H), 7.72 – 7.67 (m, 2H), 7.57 – 7.50 (m, 1H), 7.44 – 7.37 (m, 2H), 7.25 – 7.19 (m, 1H), 7.08 – 7.01 (m, 1H), 7.01 – 6.96 (m, 1H), 6.34 (s, 1H), 6.03 (s, 1H), 5.21 – 5.10 (m, 1H), 4.30 – 4.16 (m, 2H), 3.08 (dd,  $J = 16.6, 10.2$  Hz, 1H), 2.62 (dd,  $J = 16.6, 3.0$  Hz, 1H), 1.29 (t,  $J = 7.1$  Hz, 3H).  $^{13}\text{C}\{^1\text{H}\}$  NMR (100 MHz,  $\text{CDCl}_3$ )  $\delta$  165.7, 141.4, 140.0, 137.6, 133.2, 131.1, 129.0, 127.9, 127.0, 125.7, 125.3, 125.0, 116.9, 61.3, 61.0, 36.2, 14.1. HRMS (ESI)  $m/z$ : calcd. for  $\text{C}_{19}\text{H}_{19}\text{NO}_4\text{SNa}^+ [\text{M}+\text{Na}]^+$ : 380.0927, found 380.0935.

### Ethyl 2-(1-((4-methoxyphenyl)sulfonyl)indolin-2-yl)acrylate (3k)

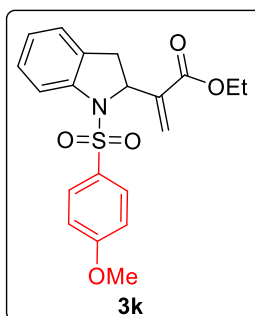

The **3k** was prepared according to the general procedure described above using **1f** (29.1 mg, 0.1 mmol), **2a** (34.5 mg, 0.15 mmol),  $\text{PPh}_2\text{Cy}$  (32.2 mg, 1.2 equiv),  $\text{PhCOOH}$  (2.4 mg, 0.2 equiv) and isolated as a yellow oily liquid (34.4 mg, 89% yield) after flash column chromatography on silica gel

(PE:EtOAc:DCM = 19:1:6).  $^1\text{H NMR}$  (400 MHz,  $\text{CDCl}_3$ )  $\delta$  7.73 (d,  $J = 8.1$  Hz, 1H), 7.65 – 7.59 (m, 2H), 7.25 – 7.20 (m, 1H), 7.06 – 6.97 (m, 2H), 6.88 – 6.81 (m, 2H), 6.33 (s, 1H), 6.04 (s, 1H), 5.16 – 5.09 (m, 1H), 4.30 – 4.15 (m, 2H), 3.81 (s, 3H), 3.11 (dd,  $J = 16.6, 10.2$  Hz, 1H), 2.62 (dd,  $J = 16.6, 3.0$  Hz, 1H), 1.29 (t,  $J = 7.1$  Hz, 3H).  $^{13}\text{C}\{^1\text{H}\}$  NMR (100 MHz,  $\text{CDCl}_3$ )  $\delta$ . 165.8, 163.2, 141.6, 140.2, 131.1, 129.24, 129.16, 127.8, 125.6, 125.2, 124.9, 117.0, 114.2, 61.2, 60.9, 55.5, 36.2, 14.1 HRMS (ESI)  $m/z$ : calcd. for  $\text{C}_{20}\text{H}_{21}\text{NO}_5\text{SNa}^+$   $[\text{M}+\text{Na}]^+$ : 410.1033, found 410.1025.

### *Ethyl 2-(1-([1,1'-biphenyl]-4-ylsulfonyl)indolin-2-yl)acrylate (3l)*

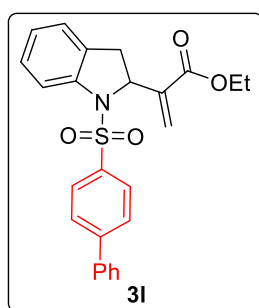

The **3l** was prepared according to the general procedure described above using **1g** (33.7 mg, 0.1 mmol), **2a** (34.5 mg, 0.15 mmol),  $\text{PPh}_2\text{Cy}$  (32.2 mg, 1.2 equiv),  $\text{PhCOOH}$  (2.4 mg, 0.2 equiv) and isolated as a yellow solid (22.3 mg, 51% yield) after flash column chromatography on silica gel

(PE:EtOAc:DCM = 19:1:6). m.p.: 122.0 – 123.8 °C.  $^1\text{H NMR}$  (400 MHz,  $\text{CDCl}_3$ )  $\delta$  7.82 – 7.74 (m, 3H), 7.60 (d,  $J = 8.4$  Hz, 2H), 7.55 (d,  $J = 7.2$  Hz, 2H), 7.45 (t,  $J = 7.3$  Hz, 2H), 7.39 (t,  $J = 7.2$  Hz, 1H), 7.29 – 7.26 (m, 1H), 7.04 (q,  $J = 7.6$  Hz, 2H), 6.36 (s, 1H), 6.07 (s, 1H), 5.28 – 5.16 (m, 1H), 4.33 – 4.17 (m, 2H), 3.16 (dd,  $J = 16.6, 10.2$  Hz, 1H), 2.66 (dd,  $J = 16.6, 2.9$  Hz, 1H), 1.30 (t,  $J = 7.1$  Hz, 3H).  $^{13}\text{C}\{^1\text{H}\}$  NMR (100 MHz,  $\text{CDCl}_3$ )  $\delta$  165.7, 145.9, 141.4, 140.1, 138.9, 136.1, 131.1, 129.0, 128.5, 127.9, 127.6, 127.5, 127.2, 125.7, 125.3, 125.0, 116.9, 61.3, 61.0, 36.2, 14.1. HRMS (ESI)  $m/z$ : alcd. for  $\text{C}_{25}\text{H}_{23}\text{NO}_4\text{SNa}^+$   $[\text{M}+\text{Na}]^+$ : 456.1240, found 456.1240.

### *Ethyl 2-(1-(mesitylsulfonyl)indolin-2-yl)acrylate (3m)*

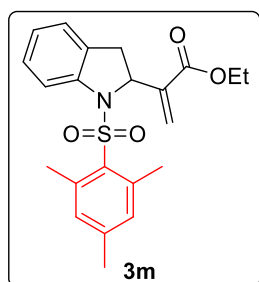

The **3m** was prepared according to the general procedure described above using **1h** (30.3 mg, 0.1 mmol), **2a** (34.5 mg, 0.15 mmol),  $\text{PPh}_2\text{Cy}$  (32.2 mg, 1.2 equiv),  $\text{PhCOOH}$  (2.4 mg, 0.2 equiv) and isolated as a yellow oily liquid (27.9 mg, 70% yield) after flash column chromatography on silica gel

(PE:EtOAc:DCM = 19:1:6).  $^1\text{H NMR}$  (400 MHz,  $\text{CDCl}_3$ )  $\delta$  7.21 (d,  $J = 7.6$  Hz, 1H), 7.13 – 7.08 (m, 2H), 6.99 – 6.94 (m, 1H), 6.92 (s, 2H), 6.19 (s, 1H), 5.86 (s, 1H), 5.30 – 5.25 (m, 1H), 4.25 – 4.12 (m, 2H), 3.51 (dd,  $J = 16.3, 10.0$  Hz, 1H), 2.75 (dd,  $J = 16.4, 2.4$  Hz, 1H), 2.57 (s, 6H), 2.28 (s, 3H), 1.26 (t,  $J = 7.1$  Hz, 3H).  $^{13}\text{C}\{^1\text{H}\}$  NMR (100 MHz,  $\text{CDCl}_3$ )  $\delta$  165.6, 143.0, 142.4, 140.4, 139.5, 132.9, 132.2, 130.9, 127.6, 125.4, 123.8, 115.2, 61.0, 60.9, 36.5, 23.0, 21.0, 14.1. HRMS (ESI)  $m/z$ : calcd. for  $\text{C}_{22}\text{H}_{25}\text{NO}_4\text{SNa}^+$   $[\text{M}+\text{Na}]^+$ : 422.1397, found 422.1387.

### *Ethyl 2-(1-(naphthalen-1-ylsulfonyl)indolin-2-yl)acrylate (3n)*

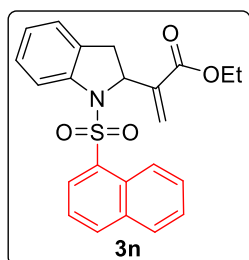

The **3n** was prepared according to the general procedure described above using **1i** (31.1 mg, 0.1 mmol), **2a** (34.5 mg, 0.15 mmol),  $\text{PPh}_2\text{Cy}$  (32.2 mg, 1.2 equiv),  $\text{PhCOOH}$  (2.4 mg, 0.2 equiv) and isolated as a yellow solid (24.9 mg, 62% yield) after flash column chromatography on silica gel (PE:EtOAc:DCM = 19:1:6). m.p.: 80.5 – 82.1 °C.  $^1\text{H NMR}$  (400 MHz,  $\text{CDCl}_3$ )  $\delta$  8.56 (d,  $J = 8.4$  Hz, 1H), 8.26 – 8.19 (m 1H), 8.02 (d,  $J = 8.1$  Hz, 1H), 7.88 – 7.83 (m 1H), 7.66 (d,  $J = 8.1$  Hz, 1H), 7.53 – 7.45 (m, 3H), 7.24 – 7.16 (m 1H), 7.02 – 6.91 (m, 2H), 6.27 (s, 1H), 5.99 (d,  $J = 1.4$  Hz, 1H), 5.36 – 5.29 (m 1H), 4.26 – 4.13 (m, 2H), 3.01 (dd,  $J = 16.4, 9.9$  Hz, 1H), 2.60 (dd,  $J = 16.3, 2.2$  Hz, 1H), 1.27 (t,  $J = 7.1$  Hz, 3H).  $^{13}\text{C}\{^1\text{H}\}$  NMR (100 MHz,  $\text{CDCl}_3$ )  $\delta$  165.6, 141.6, 139.5, 134.6, 134.3, 133.8, 130.7, 130.4, 128.8, 128.7, 128.0, 127.6, 126.9, 125.7, 125.3, 124.7, 124.0, 116.6, 61.6, 60.9, 36.1, 14.1. HRMS (ESI)  $m/z$ : calcd. for  $\text{C}_{23}\text{H}_{21}\text{NO}_4\text{SNa}^+$   $[\text{M}+\text{Na}]^+$ : 430.1083, found 430.1087.

### *Ethyl 2-(1-(methylsulfonyl)indolin-2-yl)acrylate (3o)*

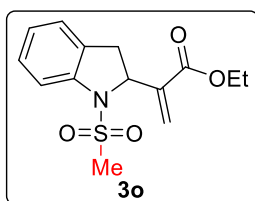

The **3o** was prepared according to the general procedure described above using **1j** (19.9 mg, 0.1 mmol), **2a** (34.5 mg, 0.15 mmol),  $\text{PPh}_2\text{Cy}$  (32.2 mg, 1.2 equiv),  $\text{PhCOOH}$  (2.4 mg, 0.2 equiv) and isolated as a yellow oily liquid (18.2 mg, 62%

yield) after flash column chromatography on silica gel (PE:EtOAc:DCM = 19:1:6). **<sup>1</sup>H NMR (400 MHz, CDCl<sub>3</sub>)**  $\delta$  7.52 (d,  $J$  = 8.0 Hz, 1H), 7.26 – 7.21 (m, 1H), 7.17 (d,  $J$  = 7.4 Hz, 1H), 7.11 – 7.04 (m, 1H), 6.34 (s, 1H), 5.98 (s, 1H), 5.29 – 5.17 (m, 1H), 4.33 – 4.17 (m, 2H), 3.69 (dd,  $J$  = 16.7, 10.4 Hz, 1H), 2.87 (m, 4H), 1.30 (t,  $J$  = 7.1 Hz, 3H). **<sup>13</sup>C{<sup>1</sup>H} NMR (100 MHz, CDCl<sub>3</sub>)**  $\delta$  165.7, 141.4, 140.4, 130.2, 128.2, 125.5, 124.8, 115.5, 61.6, 61.0, 36.6, 36.1, 14.1. **HRMS (ESI)**  $m/z$ : calcd. for C<sub>14</sub>H<sub>17</sub>NO<sub>4</sub>SNa<sup>+</sup> [M+Na]<sup>+</sup>: 318.0770, found 318.0770.

### *Ethyl 2-(1-tosyl-6-(trifluoromethyl)indolin-2-yl)acrylate (3p)*

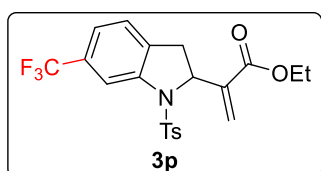

The **3p** was prepared according to the general procedure described above using **1k** (34.3 mg, 0.1 mmol), **2a** (34.5 mg, 0.15 mmol), PPh<sub>2</sub>Cy (32.2 mg, 1.2 equiv), PhCOOH (2.4 mg, 0.2 equiv) and isolated as a reddish brown oily liquid (24.9 mg, 57% yield) after flash column chromatography on silica gel (PE:EtOAc:DCM = 19:1:6). **<sup>1</sup>H NMR (400 MHz, CDCl<sub>3</sub>)**  $\delta$  7.97 (s, 1H), 7.59 (d,  $J$  = 8.3 Hz, 2H), 7.28 (d,  $J$  = 7.8 Hz, 1H), 7.22 (d,  $J$  = 8.0 Hz, 2H), 7.10 (d,  $J$  = 7.8 Hz, 1H), 6.37 (s, 1H), 6.03 (s, 1H), 5.26 – 5.13 (m, 1H), 4.33 – 4.16 (m, 2H), 3.19 (dd,  $J$  = 17.1, 10.4 Hz, 1H), 2.72 (dd,  $J$  = 17.1, 3.0 Hz, 1H), 2.37 (s, 3H), 1.30 (d,  $J$  = 7.1 Hz, 3H). **<sup>13</sup>C{<sup>1</sup>H} NMR (100 MHz, CDCl<sub>3</sub>)**  $\delta$  165.5, 144.6, 142.3, 139.9, 135.0, 134.4, 130.5 (q,  $J$  = 33 Hz), 129.9, 127.1, 126.0, 125.5, 123.9 (d,  $J$  = 270 Hz), 121.7 (q,  $J$  = 4 Hz), 113.4 (q,  $J$  = 33 Hz), 61.7, 61.1, 36.2, 21.6, 14.1. **<sup>19</sup>F{<sup>1</sup>H} NMR (376 MHz, CDCl<sub>3</sub>)**  $\delta$  -62.2. **HRMS (ESI)**  $m/z$ : calcd. for C<sub>21</sub>H<sub>20</sub>F<sub>3</sub>NO<sub>4</sub>SNa<sup>+</sup> [M+Na]<sup>+</sup>: 462.0957, found 462.0967.

### *Ethyl 2-(6-fluoro-1-tosylindolin-2-yl)acrylate (3q)*

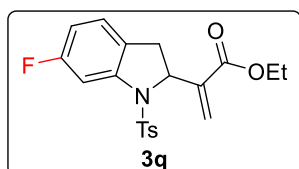

The **3q** was prepared according to the general procedure described above using **1l** (29.3 mg, 0.1 mmol), **2a** (34.5 mg, 0.15 mmol), PPh<sub>2</sub>Cy (32.2 mg, 1.2 equiv), PhCOOH (2.4 mg, 0.2 equiv) and isolated as a white solid (19.7 mg, 51% yield) after flash column chromatography on silica gel (PE:EtOAc:DCM = 19:1:6). m.p.: 79.2 – 80.2 °C. **<sup>1</sup>H**



**NMR (400 MHz, CDCl<sub>3</sub>)**  $\delta$  7.61 (d,  $J$  = 8.2 Hz, 2H), 7.50 – 7.44 (m, 1H), 7.22 (d,  $J$  = 8.0 Hz, 2H), 6.95 – 6.89 (m, 1H), 6.75 – 6.67 (m, 1H), 6.35 (s, 1H), 6.01 (s, 1H), 5.20 – 5.14 (m, 1H), 4.30 – 4.16 (m, 2H), 3.09 (dd,  $J$  = 16.3, 10.4 Hz, 1H), 2.60 (dd,  $J$  = 16.3, 3.2 Hz, 1H), 2.38 (s, 3H), 1.30 (t,  $J$  = 7.1 Hz, 3H). **<sup>13</sup>C{<sup>1</sup>H} NMR (100 MHz, CDCl<sub>3</sub>)**  $\delta$  165.6, 163.6 (d,  $J$  = 242 Hz), 144.4, 142.9 (d,  $J$  = 11 Hz), 140.0, 134.6, 129.8, 127.1, 126.2 (d,  $J$  = 3 Hz), 125.8, 125.8 (d,  $J$  = 3 Hz), 111.5 (d,  $J$  = 23 Hz), 104.7 (d,  $J$  = 28 Hz), 62.2, 61.0, 35.6, 21.6, 14.1. **<sup>19</sup>F{<sup>1</sup>H} NMR (376 MHz, CDCl<sub>3</sub>)**  $\delta$  -113.6. **HRMS (ESI)**  $m/z$ : calcd. for C<sub>20</sub>H<sub>20</sub>FNO<sub>4</sub>SNa<sup>+</sup> [M+Na]<sup>+</sup>: 412.0989, found 412.0989.

**Ethyl 2-(6-chloro-1-tosylindolin-2-yl)acrylate (3r)**

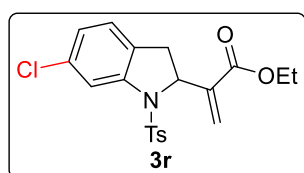

The **3r** was prepared according to the general procedure described above using **1m** (30.9 mg, 0.1 mmol), **2a** (34.5 mg, 0.15 mmol), PPh<sub>2</sub>Cy (32.2 mg, 1.2 equiv), PhCOOH (2.4 mg, 0.2 equiv) and isolated as a yellow solid (19.5 mg, 48% yield) after flash column chromatography on silica gel (PE:EtOAc:DCM = 19:1:6).  $m.p.$ : 87.2 – 88.3 °C. **<sup>1</sup>H NMR (400 MHz, CDCl<sub>3</sub>)**  $\delta$  7.74 (d,  $J$  = 1.9 Hz, 1H), 7.63 – 7.58 (m, 2H), 7.23 (d,  $J$  = 8.0 Hz, 2H), 6.99 (dd,  $J$  = 8.0, 1.9 Hz, 1H), 6.91 (d,  $J$  = 8.0 Hz, 1H), 6.35 (s, 1H), 6.01 (s, 1H), 5.18 – 5.11 (m, 1H), 4.30 – 4.15 (m, 2H), 3.08 (dd,  $J$  = 16.7, 10.4 Hz, 1H), 2.60 (dd,  $J$  = 16.7, 3.2 Hz, 1H), 2.38 (s, 3H), 1.29 (t,  $J$  = 7.1 Hz, 3H). **<sup>13</sup>C{<sup>1</sup>H} NMR (100 MHz, CDCl<sub>3</sub>)**  $\delta$  165.6, 144.4, 142.8, 139.9, 134.5, 133.5, 129.9, 129.5, 127.1, 125.9, 125.8, 124.9, 117.0, 61.9, 61.1, 35.8, 21.6, 14.1. **HRMS (ESI)**  $m/z$ : calcd. for C<sub>20</sub>H<sub>20</sub>ClNO<sub>4</sub>SH<sup>+</sup> [M+H]<sup>+</sup>: 406.0874, found 406.0863.

**Ethyl 2-(6-bromo-1-tosylindolin-2-yl)acrylate (3s)**

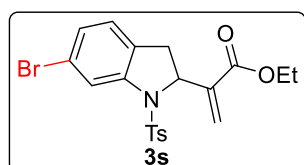

The **3s** was prepared according to the general procedure described above using **1n** (35.3 mg, 0.1 mmol), **2a** (34.5 mg, 0.15 mmol), PPh<sub>2</sub>Cy (32.2 mg, 1.2 equiv), PhCOOH (2.4 mg, 0.2 equiv) and isolated as a yellow solid (22.3 mg, 50% yield) after flash

column chromatography on silica gel (PE:EtOAc:DCM = 19:1:6). m.p.: 95.2 – 96.8 °C.  $^1\text{H NMR}$  (400 MHz,  $\text{CDCl}_3$ )  $\delta$  7.89 (d,  $J = 1.7$  Hz, 1H), 7.62 – 7.58 (m, 2H), 7.23 (d,  $J = 8.1$  Hz, 2H), 7.14 (dd,  $J = 7.9, 1.8$  Hz, 1H), 6.86 (d,  $J = 7.9$  Hz, 1H), 6.35 (s, 1H), 6.01 (s, 1H), 5.16 – 5.11 (m, 1H), 4.30 – 4.16 (m, 2H), 3.05 (dd,  $J = 16.9, 10.3$  Hz, 1H), 2.59 (dd,  $J = 16.8, 3.2$  Hz, 1H), 2.38 (s, 3H), 1.30 (t,  $J = 7.1$  Hz, 3H).  $^{13}\text{C}\{^1\text{H}\}$  NMR (100 MHz,  $\text{CDCl}_3$ )  $\delta$  165.6, 144.4, 143.0, 139.8, 134.4, 130.1, 129.8, 127.8, 127.1, 126.4, 125.8, 121.1, 119.8, 61.8, 61.0, 35.8, 21.6, 14.1. HRMS (ESI) m/z: calcd. for  $\text{C}_{20}\text{H}_{20}\text{BrNO}_4\text{SNa}^+$   $[\text{M}+\text{Na}]^+$ : 472.0189, found 472.0185.

### *Ethyl 2-(1-tosyl-5-(trifluoromethyl)indolin-2-yl)acrylate (3t)*

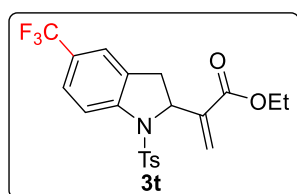

The **3t** was prepared according to the general procedure described above using **1o** (34.3 mg, 0.1 mmol), **2a** (34.5 mg, 0.15 mmol),  $\text{PPh}_2\text{Cy}$  (32.2 mg, 1.2 equiv),  $\text{PhCOOH}$  (2.4 mg, 0.2 equiv) and isolated as a yellow oily liquid (23.3 mg, 53% yield) after flash column chromatography on silica gel (PE:EtOAc:DCM = 19:1:6).  $^1\text{H NMR}$  (400 MHz,  $\text{CDCl}_3$ )  $\delta$  7.79 (d,  $J = 8.5$  Hz, 1H), 7.61 (d,  $J = 8.3$  Hz, 2H), 7.49 (d,  $J = 8.4$  Hz, 1H), 7.26 – 7.20 (m, 3H), 6.36 (s, 1H), 6.00 (s, 1H), 5.20 (dd,  $J = 10.4, 3.3$  Hz, 1H), 4.30 – 4.16 (m, 2H), 3.22 (dd,  $J = 16.8, 10.5$  Hz, 1H), 2.73 (dd,  $J = 16.9, 3.4$  Hz, 1H), 2.38 (s, 3H), 1.28 (t,  $J = 7.1$  Hz, 3H).  $^{13}\text{C}\{^1\text{H}\}$  NMR (100 MHz,  $\text{CDCl}_3$ )  $\delta$  165.5, 144.7, 144.6, 139.9, 134.6, 131.5, 129.9, 127.0, 126.7 (q,  $J = 32$  Hz), 126.0, 125.5 (q,  $J = 4$  Hz), 122.7, 122.4 (q,  $J = 4$  Hz), 116.0, 61.8, 61.1, 36.0, 21.5, 14.1.  $^{19}\text{F}\{^1\text{H}\}$  NMR (376 MHz,  $\text{CDCl}_3$ )  $\delta$  -61.9. HRMS (ESI) m/z: calcd. for  $\text{C}_{21}\text{H}_{20}\text{F}_3\text{NO}_4\text{SNa}^+$   $[\text{M}+\text{Na}]^+$ : 462.0957, found 462.0962.

### *Ethyl 2-(5-bromo-1-tosylindolin-2-yl)acrylate (3u)*

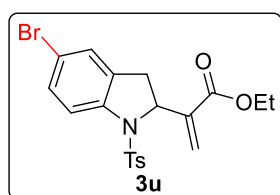

The **3u** was prepared according to the general procedure described above using **1p** (35.3 mg, 0.1 mmol), **2a** (34.5 mg, 0.15 mmol),  $\text{PPh}_2\text{Cy}$  (32.2 mg, 1.2 equiv),  $\text{PhCOOH}$  (2.4 mg, 0.2 equiv) and isolated as a yellow solid (21.2 mg, 47% yield)

after flash column chromatography on silica gel (PE:EtOAc:DCM = 19:1:6). m.p.: 113.7 – 115.0 °C.  $^1\text{H NMR}$  (400 MHz,  $\text{CDCl}_3$ )  $\delta$  7.60 (d,  $J = 8.5$  Hz, 1H), 7.57 (d,  $J = 8.1$  Hz, 2H), 7.36 – 7.31 (m, 1H), 7.21 (d,  $J = 8.0$  Hz, 2H), 7.12 (s, 1H), 6.34 (s, 1H), 6.01 (s, 1H), 5.17 – 5.08 (m, 1H), 4.30–4.16 (m, 2H), 3.08 (dd,  $J = 16.8, 10.3$  Hz, 1H), 2.61 (dd,  $J = 16.9, 3.1$  Hz, 1H), 2.38 (s, 3H), 1.29 (t,  $J = 7.1$  Hz, 3H).  $^{13}\text{C}\{^1\text{H}\}$  NMR (100 MHz,  $\text{CDCl}_3$ )  $\delta$  165.6, 144.4, 140.9, 139.8, 134.4, 133.5, 130.8, 129.8, 128.3, 127.1, 125.9, 118.2, 117.7, 61.6, 61.1, 36.0, 21.6, 14.1. HRMS (ESI) m/z: calcd. for  $\text{C}_{20}\text{H}_{20}\text{BrNO}_4\text{SNa}^+ [\text{M}+\text{Na}]^+$ : 472.0189, found 472.0193.

#### *Ethyl 2-(5-methyl-1-tosylindolin-2-yl)acrylate (3v)*

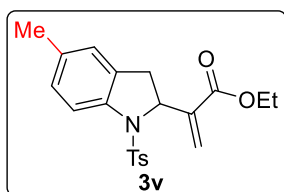

The **3v** was prepared according to the general procedure described above using **1q** (28.9 mg, 0.1 mmol), **2a** (34.5 mg, 0.15 mmol),  $\text{PPh}_2\text{Cy}$  (32.2 mg, 1.2 equiv),  $\text{PhCOOH}$  (2.4 mg, 0.2 equiv) and isolated as a yellow solid (23.6 mg, 61% yield)

after flash column chromatography on silica gel (PE:EtOAc:DCM = 19:1:6). m.p.: 165.0 – 165.9 °C.  $^1\text{H NMR}$  (400 MHz,  $\text{CDCl}_3$ )  $\delta$  7.60 (d,  $J = 8.2$  Hz, 1H), 7.58 – 7.53 (m, 2H), 7.17 (d,  $J = 8.0$  Hz, 2H), 7.02 (dd,  $J = 8.2, 1.6$  Hz, 1H), 6.80 (s, 1H), 6.32 (s, 1H), 6.03 (s, 1H), 5.14 – 5.08 (m, 1H), 4.30 – 4.16 (m, 2H), 3.02 (dd,  $J = 16.5, 10.1$  Hz, 1H), 2.55 (dd,  $J = 16.5, 3.0$  Hz, 1H), 2.35 (s, 3H), 2.25 (s, 3H), 1.29 (t,  $J = 7.1$  Hz, 3H).  $^{13}\text{C}\{^1\text{H}\}$  NMR (100 MHz,  $\text{CDCl}_3$ )  $\delta$  165.8, 144.0, 140.2, 139.2, 134.8, 134.7, 131.2, 129.6, 128.4, 127.1, 125.8, 125.5, 116.8, 61.4, 60.9, 36.1, 21.5, 20.9, 14.1. HRMS (ESI) m/z: calcd. for  $\text{C}_{21}\text{H}_{23}\text{NO}_4\text{SNa}^+ [\text{M}+\text{Na}]^+$ : 408.1240, found 408.1243.

#### *Ethyl 2-(5-methoxy-1-tosylindolin-2-yl)acrylate (3w)*

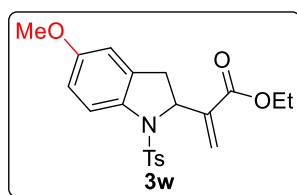

The **3w** was prepared according to the general procedure described above using **1r** (30.5 mg, 0.1 mmol), **2a** (34.5 mg, 0.15 mmol),  $\text{PPh}_2\text{Cy}$  (32.2 mg, 1.2 equiv),  $\text{PhCOOH}$  (2.4 mg, 0.2 equiv) and isolated as a yellow solid (25.6 mg, 64%

yield) after flash column chromatography on silica gel (PE:EtOAc:DCM = 19:1:6). m.p.: 148.0 – 149.9 °C.  $^1\text{H NMR}$  (400 MHz,  $\text{CDCl}_3$ )  $\delta$  7.63 (d,  $J = 8.8$  Hz, 1H), 7.58 – 7.50 (m, 2H), 7.17 (d,  $J = 8.1$  Hz, 2H), 6.76 (dd,  $J = 8.8, 2.7$  Hz, 1H), 6.53 (d,  $J = 2.6$  Hz, 1H), 6.31 (s, 1H), 6.04 (s, 1H), 5.14 – 5.06 (m, 1H), 4.30 – 4.13 (m, 2H), 3.73 (s, 3H), 2.95 (dd,  $J = 16.6, 10.0$  Hz, 1H), 2.52 (dd,  $J = 16.7, 2.8$  Hz, 1H), 2.35 (s, 3H), 1.29 (t,  $J = 7.1$  Hz, 3H).  $^{13}\text{C}\{^1\text{H}\}$  NMR (100 MHz,  $\text{CDCl}_3$ )  $\delta$  165.7, 157.6, 143.9, 139.8, 134.8, 134.4, 133.1, 129.6, 127.1, 125.6, 118.3, 112.9, 110.8, 61.6, 60.9, 55.5, 36.3, 21.5, 14.1. HRMS (ESI)  $m/z$ : calcd. for  $\text{C}_{21}\text{H}_{23}\text{NO}_5\text{SNa}^+$   $[\text{M}+\text{Na}]^+$ : 424.1189, found 424.1182.

***Ethyl 2-(1-tosyl-2,3-dihydro-1H-benzof[*f*]indol-2-yl)acrylate (3x)***

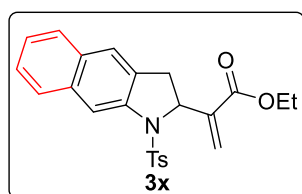

The **3x** was prepared according to the general procedure described above using **1s** (32.5 mg, 0.1 mmol), **2a** (34.5 mg, 0.15 mmol),  $\text{PPh}_2\text{Cy}$  (32.2 mg, 1.2 equiv),  $\text{PhCOOH}$  (2.4 mg, 0.2 equiv) and isolated as a yellow oily liquid (30.3 mg,

72% yield) after flash column chromatography on silica gel (PE:EtOAc:DCM = 19:1:6).  $^1\text{H NMR}$  (400 MHz,  $\text{CDCl}_3$ )  $\delta$  8.11 (s, 1H), 7.86 (d,  $J = 8.2$  Hz, 1H), 7.68 – 7.62 (m, 3H), 7.48 – 7.42 (m, 2H), 7.37 (ddd,  $J = 8.2, 6.9, 1.3$  Hz, 1H), 7.16 (d,  $J = 8.0$  Hz, 2H), 6.33 (s, 1H), 6.09 – 6.01 (m, 1H), 5.32 – 5.23 (m, 1H), 4.31 – 4.17 (m, 2H), 3.26 (ddd,  $J = 16.8, 10.0, 1.8$  Hz, 1H), 2.82 (dd,  $J = 16.8, 1.8$  Hz, 1H), 2.33 (s, 3H), 1.30 (t,  $J = 7.1$  Hz, 3H).  $^{13}\text{C}\{^1\text{H}\}$  NMR (100 MHz,  $\text{CDCl}_3$ )  $\delta$  165.7, 144.1, 140.1, 140.0, 135.1, 133.5, 131.40, 131.38, 129.7, 127.9, 127.3, 127.0, 126.0, 125.7, 125.0, 124.0, 113.1, 61.7, 61.0, 35.8, 21.5, 14.1. HRMS (ESI)  $m/z$ : calcd. for  $\text{C}_{24}\text{H}_{23}\text{NO}_4\text{SNa}^+$   $[\text{M}+\text{Na}]^+$ : 444.1240, found 444.1249.

## IV. Gram-Scale and Synthetic Manipulations

### (a) Synthesis of **3a** on gram-scale.

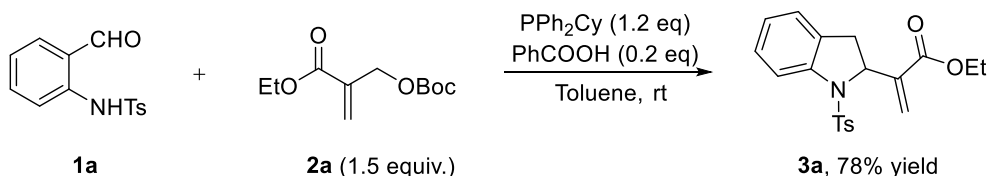

To a stirred solution of *o*-aminobenzaldehyde **1a** (4.0 mmol, 1.0 equiv) and allyl carbonate **2a** (6 mmol, 1.5 equiv) were added to toluene (80.0 mL) with PPh<sub>2</sub>Cy (1.2 equiv) and PhCOOH (20 mol %), and stirred at room temperature. The reaction mixture was purified by flash chromatography on silica gel (PE:EtOAc:DCM = 19:1:6) with a yield of 78%.

### (b) Synthetic manipulations of **3a**.

#### *Ethyl 3-(p-tolylthio)-2-(1-tosylindolin-2-yl)propanoate (4)*

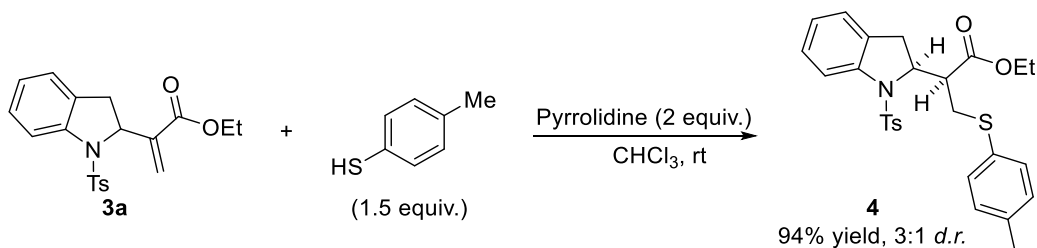

According to the known procedure.<sup>1</sup> *p*-Toluenethiol (18.6 mg, 0.15 mmol) and Pyrrolidine (16  $\mu$ L, 0.2 mmol) were added to a solution of **3a** (37.1 mg, 0.1 mmol) in CHCl<sub>3</sub> (4.0 mL) at room temperature. The resulting reaction mixture was stirred at rt for 12 hours. The reaction was quenched with saturated NH<sub>4</sub>Cl and the mixture was extracted with CH<sub>2</sub>Cl<sub>2</sub>. The combined organic phases were dried over Na<sub>2</sub>SO<sub>4</sub> and concentrated in vacuo. The residue was purified by flash column on silica gel (PE:EtOAc:DCM = 5:2:1) to afford a white solid **4** (46.6 mg, 94% yield, 3:1 *d.r.*). m.p.: 99.5 – 101.0 °C. <sup>1</sup>H NMR (400 MHz, CDCl<sub>3</sub>)  $\delta$  7.66 (d, *J* = 8.0 Hz, 1H), 7.47 (d, *J* = 8.2 Hz, 2H), 7.27 (s, 1H), 7.25 (s, 1H), 7.24 – 7.18 (m, 1H), 7.16 – 7.08 (m, 4H), 7.03 (t, *J* = 7.3 Hz, 1H), 6.99 (d, *J* = 7.3 Hz, 1H), 4.55 (ddd, *J* = 9.7, 4.2, 2.4 Hz, 1H), 3.87 (q, *J* = 7.1 Hz, 2H), 3.17 (d, *J* = 6.9 Hz, 2H), 3.03 (ddd, *J* = 8.0, 6.3, 4.1 Hz,

1H), 2.81 (dd,  $J = 16.5, 2.3$  Hz, 1H), 2.63 (dd,  $J = 16.5, 9.7$  Hz, 1H), 2.34 (s, 3H), 2.31 (s, 3H), 1.10 (t,  $J = 7.1$  Hz, 3H).  $^{13}\text{C}\{^1\text{H}\}$  NMR (100 MHz,  $\text{CDCl}_3$ )  $\delta$  171.1, 144.1, 141.8, 136.5, 134.5, 132.4, 131.8, 130.5, 129.8, 129.6, 127.9, 127.1, 125.3, 124.7, 118.2, 62.4, 61.0, 51.3, 31.8, 31.6, 21.5, 21.0, 13.9. HRMS (ESI)  $m/z$ : calcd. for  $\text{C}_{27}\text{H}_{29}\text{NO}_4\text{S}_2\text{Na}^+$   $[\text{M}+\text{Na}]^+$ : 518.1430, found 518.1430.

**Ethyl 2-(indolin-2-yl)acrylate (5)**

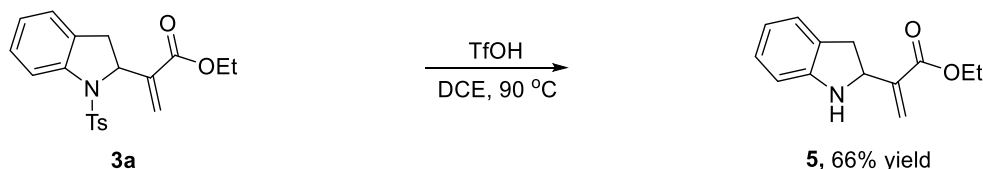

According to the known procedure.<sup>2</sup> TfOH (30.0 mg, 0.2 mmol) was added to a solution of **3a** (37.1 mg, 0.1 mmol) in DCE (2.0 mL) at room temperature. The resulting reaction mixture was heated at 90 °C and stirred by reflux for 4 hours. The reaction was quenched with saturated  $\text{NaHCO}_3$  and the mixture was extracted with  $\text{CH}_2\text{Cl}_2$ . The combined organic phases were dried over  $\text{Na}_2\text{SO}_4$  and concentrated in vacuo. The residue was purified by flash column on silica gel (PE:EtOAc:DCM = 5:1:1) to afford a brown oil **5** (14.3 mg, 66% yield).  $^1\text{H}$  NMR (400 MHz,  $\text{CDCl}_3$ )  $\delta$  7.12 – 7.00 (m, 2H), 6.73 – 6.68 (m, 1H), 6.65 (d,  $J = 7.7$  Hz, 1H), 6.29 (t,  $J = 1.2$  Hz, 1H), 5.95 (t,  $J = 1.4$  Hz, 1H), 4.78 (t,  $J = 9.0$ , 1H), 4.31 – 4.19 (m, 2H), 4.07 (s, 1H), 3.40 (dd,  $J = 15.6, 9.1$  Hz, 1H), 2.84 (dd,  $J = 15.5, 8.9$  Hz, 1H), 1.33 (t,  $J = 7.1$  Hz, 3H).  $^{13}\text{C}\{^1\text{H}\}$  NMR (100 MHz,  $\text{CDCl}_3$ )  $\delta$  166.6, 150.4, 142.5, 127.8, 127.4, 124.6, 123.9, 118.9, 109.1, 60.8, 59.0, 36.5, 14.2. HRMS (ESI)  $m/z$ : calcd. for  $\text{C}_{13}\text{H}_{15}\text{NO}_2\text{Na}^+$   $[\text{M}+\text{Na}]^+$ : 240.0995, found 240.0994.

**Ethyl 2,3-dihydroxy-2-(1-tosylindolin-2-yl)propanoate (6)**

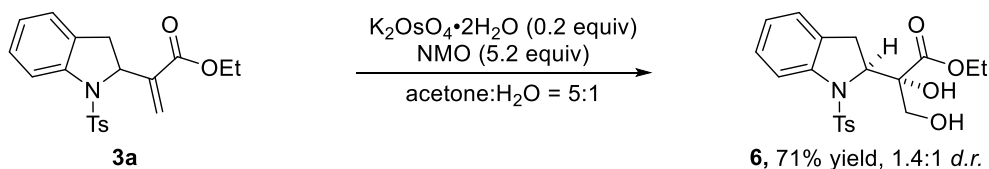

According to the known procedure.<sup>3</sup> Potassium osmate dihydrate (7.3 mg, 0.02 mmol) and 4-methylmorpholine N-oxide (0.05 mL, 0.52 mmol) were added to a solution of **3a** (37.1 mg, 0.1 mmol) in acetone: $\text{H}_2\text{O} = 5:1$  (4.0 mL) at room temperature. The resulting reaction mixture was stirred at rt for 12 h. The reaction was

quenched with saturated Na<sub>2</sub>SO<sub>3</sub> and the mixture was extracted with CH<sub>2</sub>Cl<sub>2</sub>. The combined organic phases were dried over Na<sub>2</sub>SO<sub>4</sub> and concentrated in vacuo. The residue was purified by flash column on silica gel (PE:EtOAc:DCM = 5:2:1) to afford a white solid **6** (28.6 mg, 71% yield, 1.4:1 *d.r.*). m.p.: 109.2 – 110.9 °C. <sup>1</sup>H NMR (400 MHz, CDCl<sub>3</sub>) δ 7.64 (d, *J* = 8.0 Hz, 1H), 7.44 – 7.37 (m, 2H), 7.25 – 7.18 (m, 1H), 7.13 (d, *J* = 8.0 Hz, 2H), 7.08 – 7.02 (m, 1H), 7.00 – 6.95 (m, 1H), 4.61 (dd, *J* = 8.9, 2.5 Hz, 1H), 4.16 – 4.09 (m, 2H), 4.09 – 4.04 (m, 1H), 3.88 (dd, *J* = 11.9, 6.6 Hz, 1H), 3.50 (s, 1H), 2.70 (t, *J* = 7.2 Hz, 1H), 2.62 (dd, *J* = 16.5, 2.5 Hz, 1H), 2.54 (dd, *J* = 16.4, 8.9 Hz, 1H), 2.34 (s, 3H), 1.21 (t, *J* = 7.1 Hz, 3H). <sup>13</sup>C{<sup>1</sup>H} NMR (100 MHz, CDCl<sub>3</sub>) δ 172.7, 144.3, 141.9, 133.8, 133.7, 129.6, 127.6, 127.2, 125.8, 124.2, 118.9, 80.5, 64.8, 64.1, 62.5, 30.6, 21.5, 14.0. HRMS (ESI) *m/z*: calcd. for C<sub>20</sub>H<sub>23</sub>NO<sub>6</sub>SNa<sup>+</sup> [M+Na]<sup>+</sup>: 428.1138, found 428.1146.

**Ethyl 3-(benzylamino)-2-(1-tosylindolin-2-yl)propanoate (7)**

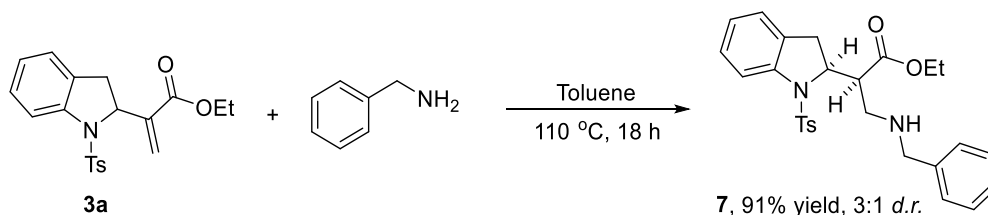

Benzylamine (53.6 mg, 0.5 mmol) was added to a solution of **3a** (37.1 mg, 0.1 mmol) in Toluene (2.0 mL) at room temperature. The resulting reaction mixture was heated at 110 °C and stirred by reflux for 18 hours. The reaction was quenched with saturated NaHCO<sub>3</sub> and the mixture was extracted with CH<sub>2</sub>Cl<sub>2</sub>. The combined organic phases were dried over Na<sub>2</sub>SO<sub>4</sub> and concentrated in vacuo. The residue was purified by flash column on silica gel (PE:EtOAc:DCM = 10:5:1) to afford a brown oil **7** (43.6 mg, 91% yield, 3:1 *d.r.*). <sup>1</sup>H NMR (400 MHz, (CD<sub>3</sub>)<sub>2</sub>CO) δ 7.58 – 7.51 (m, 3H), 7.31 – 7.28 (m, 3H), 7.27 – 7.25 (m, 3H), 7.25 – 7.18 (m, 2H), 7.10 – 7.02 (m, 2H), 7.78 – 7.71 (m, 1H), 3.99 – 3.90 (m, 2H), 3.76 – 3.63 (m, 2H), 3.03 – 2.97 (m, 1H), 2.93 – 2.90 (m, 1H), 2.88 – 2.87 (m, 1H), 2.86 – 2.83 (m, 1H), 2.71 (dd, *J* = 16.6, 9.7 Hz, 1H), 2.34 (s, 3H), 1.13 (t, *J* = 7.1 Hz, 3H). <sup>13</sup>C{<sup>1</sup>H} NMR (100 MHz, (CD<sub>3</sub>)<sub>2</sub>CO) δ 172.4, 145.1, 142.8, 141.7, 135.8, 134.1, 130.5, 128.9, 128.8, 128.3, 128.0, 127.4,

126.0, 125.8, 118.6, 62.8, 61.0, 54.3, 52.1, 46.9, 32.8, 21.4, 14.3. **HRMS (ESI) m/z:** calcd. for  $C_{27}H_{30}N_2O_4SH^+$   $[M+H]^+$ : 479.1999, found 479.2005.

***Ethyl (Z)-2-ethyl-4-(2-((4-methylphenyl)sulfonamido)phenyl)but-2-enoate (8)***

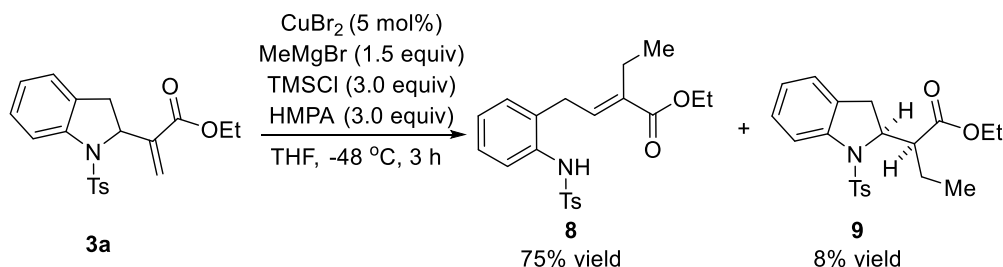

The **3a** (37.1 mg, 0.1 mmol) and  $CuBr_2$  (11.2 mg, 0.05 mmol) was added to a reaction tube. Vacuum for 15 minutes and inject nitrogen. Then, THF (1 mL),  $Me_3SiCl$  (31.1 mg, 0.3 mmol) and HMPA (53.6 mg, 0.3 mmol) were added at  $-48\text{ }^\circ\text{C}$  and  $MeMgBr$  (0.15 mL, 0.15 mmol) was added drop by drop for 1 hours. The reaction was quenched with saturated  $NH_4Cl$  and the mixture was extracted with EtOAc. The combined organic phases were dried over  $Na_2SO_4$  and concentrated in vacuo. The residue was purified by flash column on silica gel (PE:EtOAc = 5:2) to afford a white solid **8** (29.1 mg, 75% yield) and **9** (2.9 mg, 8% yield). Compound data of **8**:  $^1H$  NMR (400 MHz,  $CDCl_3$ )  $\delta$  7.59 (d,  $J = 8.3$  Hz, 2H), 7.23 (d,  $J = 8.0$  Hz, 2H), 7.20 – 7.13 (m, 3H), 7.12 – 7.05 (m, 1H), 6.57 (dd,  $J = 15.4, 8.0$  Hz, 2H), 4.18 (q,  $J = 7.1$  Hz, 2H), 3.29 (d,  $J = 7.5$  Hz, 2H), 2.40 (s, 3H), 2.31 (q,  $J = 7.5$  Hz, 2H), 1.28 (t,  $J = 7.1$  Hz, 3H), 1.00 (t,  $J = 7.5$  Hz, 3H).  $^{13}C\{^1H\}$  NMR (100 MHz,  $CDCl_3$ )  $\delta$  167.3, 143.9, 137.6, 136.5, 135.8, 134.4, 134.1, 129.8, 129.6, 127.5, 127.19, 127.15, 126.2, 60.6, 29.9, 21.5, 20.1, 14.2, 13.7. **HRMS (ESI) m/z:** calcd. for  $C_{21}H_{25}NO_4SNa^+$   $[M+Na]^+$ : 410.1397, found 410.1407.

Compound data of **9**:  $^1H$  NMR (400 MHz,  $CDCl_3$ )  $\delta$  7.63 (d,  $J = 8.0$  Hz, 1H), 7.45 (d,  $J = 8.3$  Hz, 2H), 7.24 – 7.18 (m, 1H), 7.12 (d,  $J = 8.1$  Hz, 2H), 7.07 – 6.98 (m, 2H), 4.41 (td,  $J = 8.1, 2.9$  Hz, 1H), 4.11 – 3.98 (m, 2H), 2.59 – 2.49 (m, 3H), 2.33 (s, 3H), 1.97 – 1.76 (m, 2H), 1.15 (t,  $J = 7.1$  Hz, 3H).  $^{13}C\{^1H\}$  NMR (100 MHz,  $CDCl_3$ )  $\delta$  173.6, 143.9, 143.8, 141.4, 135.2, 133.1, 129.5, 127.6, 127.1, 125.4, 125.0, 118.9, 63.6, 60.5, 52.5, 32.8, 22.6, 21.5, 14.2, 11.6. **HRMS (ESI) m/z:** calcd. for  $C_{21}H_{25}NO_4SNa^+$   $[M+Na]^+$ : 410.1397, found 410.1402.



## V. Mechanistic Studies

### (a) Control Experiments of **1a** and **2a**.

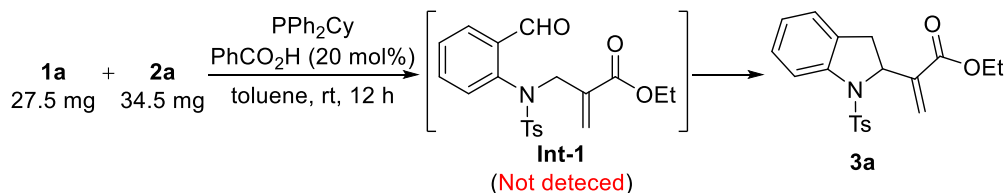

| PPh <sub>2</sub> Cy | 0.2 equiv     | 0.5 equiv     | 0.8 equiv     | 1.0 equiv     | 1.2 equiv     |
|---------------------|---------------|---------------|---------------|---------------|---------------|
| <b>3a</b> (%)       | 2.2 mg (6%)   | 9.0 mg (24%)  | 16.1 mg (43%) | 23.4 mg (63%) | 32.5 mg (88%) |
| <b>1a</b> (%)       | 24.1 mg (88%) | 18.4 mg (67%) | 9.6 mg (35%)  | 3.3 mg (12%)  | 0.0 mg (0%)   |

To a stirred solution of *o*-aminobenzaldehyde **1a** (27.5 mg, 0.1 mmol) and allyl carbonate **2a** (34.5 mg, 0.15 mmol, 1.5 equiv) in toluene (2.0 mL) was added PPh<sub>2</sub>Cy (0.2-1.2 equiv) and benzoic acid (2.4 mg, 20 mol%) at room temperature for 12 h. The reaction mixture was purified without concentration via flash chromatography on silica gel (PE:EtOAc:DCM = 19:1:6) to afford compounds **3a** and **1a**.

### (b) Transformation Experiment of **3a'**

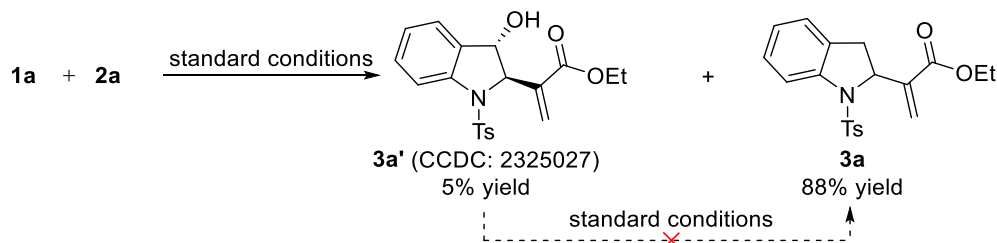

To a stirred solution of *o*-aminobenzaldehyde **1a** (27.5 mg, 0.1 mmol) and allyl carbonate **2a** (34.5 mg, 0.15 mmol, 1.5 equiv) in toluene (2.0 mL) was added PPh<sub>2</sub>Cy (32.2 mg, 0.12 mmol, 1.2 equiv) and benzoic acid (2.4 mg, 20 mol%) at room temperature for 12 h. The reaction mixture was purified without concentration via flash chromatography on silica gel (PE:EtOAc:DCM = 19:1:6) to afford compounds **3a'** (1.9 mg, 5% yield). Compound data of **3a'**: <sup>1</sup>H NMR (400 MHz, (CD<sub>3</sub>)<sub>2</sub>CO) δ 7.73 (d, *J* = 8.3 Hz, 2H), 7.64 (d, *J* = 8.2 Hz, 1H), 7.38 – 7.25 (m, 4H), 7.10 – 7.04 (m, 1H), 6.26 (s, 1H), 5.86 (s, 1H), 4.99 (s, 1H), 4.85–4.79 (m, 2H), 4.21 (qd, *J* = 7.1, 4.6 Hz, 2H), 2.35 (s, 3H), 1.23 (t, *J* = 7.2 Hz, 3H). <sup>13</sup>C{<sup>1</sup>H} NMR (100 MHz,

(CD<sub>3</sub>)<sub>2</sub>CO)  $\delta$  166.0, 145.1, 142.9, 139.8, 135.9, 133.6, 130.5, 130.4, 128.4, 127.3, 126.2, 125.0, 115.9, 76.7, 72.8, 61.5, 21.4, 14.3. **HRMS (ESI)**  $m/z$ : calcd. for C<sub>20</sub>H<sub>21</sub>NO<sub>5</sub>SNa<sup>+</sup> [M+Na]<sup>+</sup>: 410.1033, found 410.1038.

### (c) Control Experiment of **1a** and **2g**

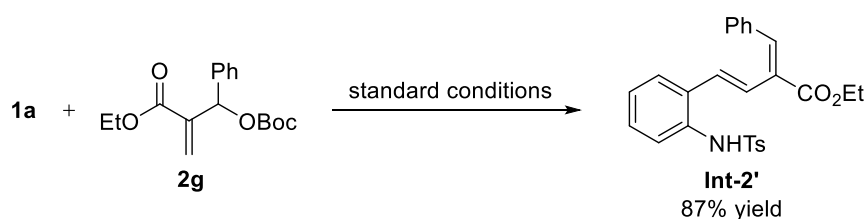

To a stirred solution of *o*-aminobenzaldehyde **1a** (27.5 mg, 0.1 mmol) and allyl carbonate **2g** (46.0 mg, 0.15 mmol, 1.5 equiv) in toluene (2.0 mL) was added PPh<sub>2</sub>Cy (32.2 mg, 0.12 mmol, 1.2 equiv) and benzoic acid (2.4 mg, 20 mol%) at room temperature for 12 h. The reaction mixture was purified without concentration via flash chromatography on silica gel (PE:EtOAc:DCM = 20:3:1) to afford compounds **Int-2'** (38.9 mg, 87% yield). Compound data of **Int-2'**: <sup>1</sup>H NMR (400 MHz, CDCl<sub>3</sub>)  $\delta$  7.65 – 7.55 (m, 3H), 7.46 – 7.34 (m, 6H), 7.30 – 7.27 (m, 1H), 7.23 – 7.20 (m, 1H), 7.18 – 7.14 (m, 2H), 7.03 (d,  $J$  = 16.2 Hz, 1H), 6.70 (d,  $J$  = 16.3 Hz, 1H), 6.57 (s, 1H), 4.38 (q,  $J$  = 7.1 Hz, 2H), 2.30 (s, 3H), 1.44 (t,  $J$  = 7.1 Hz, 3H). <sup>13</sup>C{<sup>1</sup>H} NMR (100 MHz, CDCl<sub>3</sub>)  $\delta$  167.0, 143.8, 139.9, 136.4, 135.3, 133.6, 132.4, 130.0, 129.51, 129.48, 129.0, 128.8, 128.7, 128.6, 127.3, 126.5, 126.3, 125.5, 125.3, 61.2, 21.5, 14.4. **HRMS (ESI)**  $m/z$ : calcd. for C<sub>26</sub>H<sub>25</sub>NO<sub>4</sub>SNa<sup>+</sup> [M+Na]<sup>+</sup>: 470.1397, found 470.1404.

### (d) The Deuterium Labeling Experiment

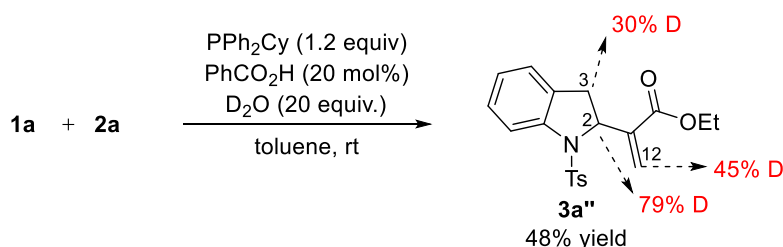

To a stirred solution of *o*-aminobenzaldehyde **1a** (27.5 mg, 0.1 mmol), allyl carbonate **2a** (34.5 mg, 0.15 mmol, 1.5 equiv), D<sub>2</sub>O (40.0 mg, 20.0 equiv), PPh<sub>2</sub>Cy (32.2 mg,

0.12 mmol, 1.2 equiv), benzoic acid (2.4 mg, 20 mol%) and 2.0 mL of toluene. The resulting reaction mixture was stirred at room temperature for 12 h. The reaction mixture was concentrated and the residue was purified by silica gel flash column chromatography (PE:EtOAc:DCM = 19:1:6) to afford corresponding product d-**3a''** as a yellow oily liquid (18.1 mg, 48% yield).

## VI. References

1. (a) Patil, D. V.; Phun, L. H.; France, S. Indium-Catalyzed Homo-Nazarov Cyclizations of Alkenyl Cyclopropyl Ketones. *Org. Lett.* **2010**, *12*, 5684–5687. (b) Cabrera, S.; Alemán, J.; Bolze, P.; Bertelsen, S.; Jørgensen, K. A. An Unexpected Organocatalytic Asymmetric Tandem Michael/Morita–Baylis–Hillman Reaction. *Angew. Chem. Int. Ed.* **2008**, *47*, 121–125.
2. Javorskis, T.; Orentas, E. Chemoselective Deprotection of Sulfonamides Under Acidic Conditions: Scope, Sulfonyl Group Migration, and Synthetic Applications. *J. Org. Chem.* **2017**, *82*, 13423–13439.
3. Gao, J.; Li, Y.; Wang, N.; Li, Z.; Huang, N.; Yao, H. One-Pot Stereoselective Synthesis of 2, 3, 4-Unprotected  $\beta$ -N-Glycopyranosides from Glycals and Amines. *Adv. Synth. Catal.* **2023**, *365*, 2350–2355.

## VII. X-Ray Crystallographic Analysis

**Crystal Growth Method:** 20 mg of **3j** was added in a HPLC vial and dissolved by 1.0 mL DCM, closed the lid. Then put it in a large bottle, added PE to the same level of the liquid in the HPLC vial, tighten the lid, put it in a fumehood and waited for growth.

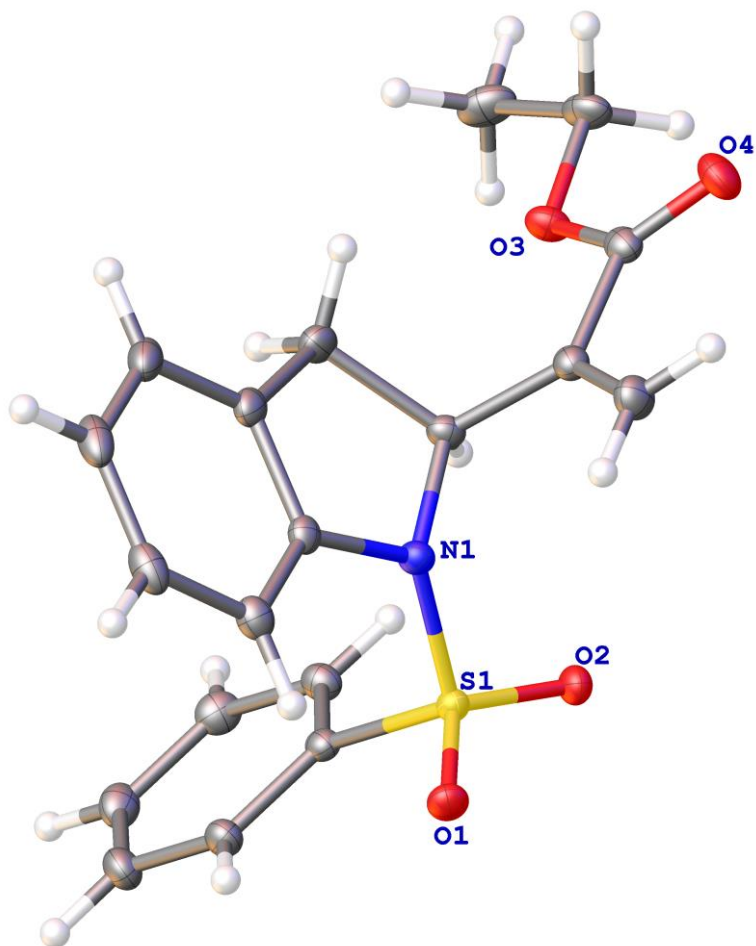

**Figure S1.** X-ray structure of **3j** (ellipsoid contour at 50% probability CCDC 2287281)

**Crystal Growth Method:** 15 mg of **4** was added in a HPLC vial and dissolved by 1.0 mL DCM, closed the lid. Then put it in a large bottle, added PE to the same level of the liquid in the HPLC vial, tighten the lid, put it in a fumehood and waited for growth.

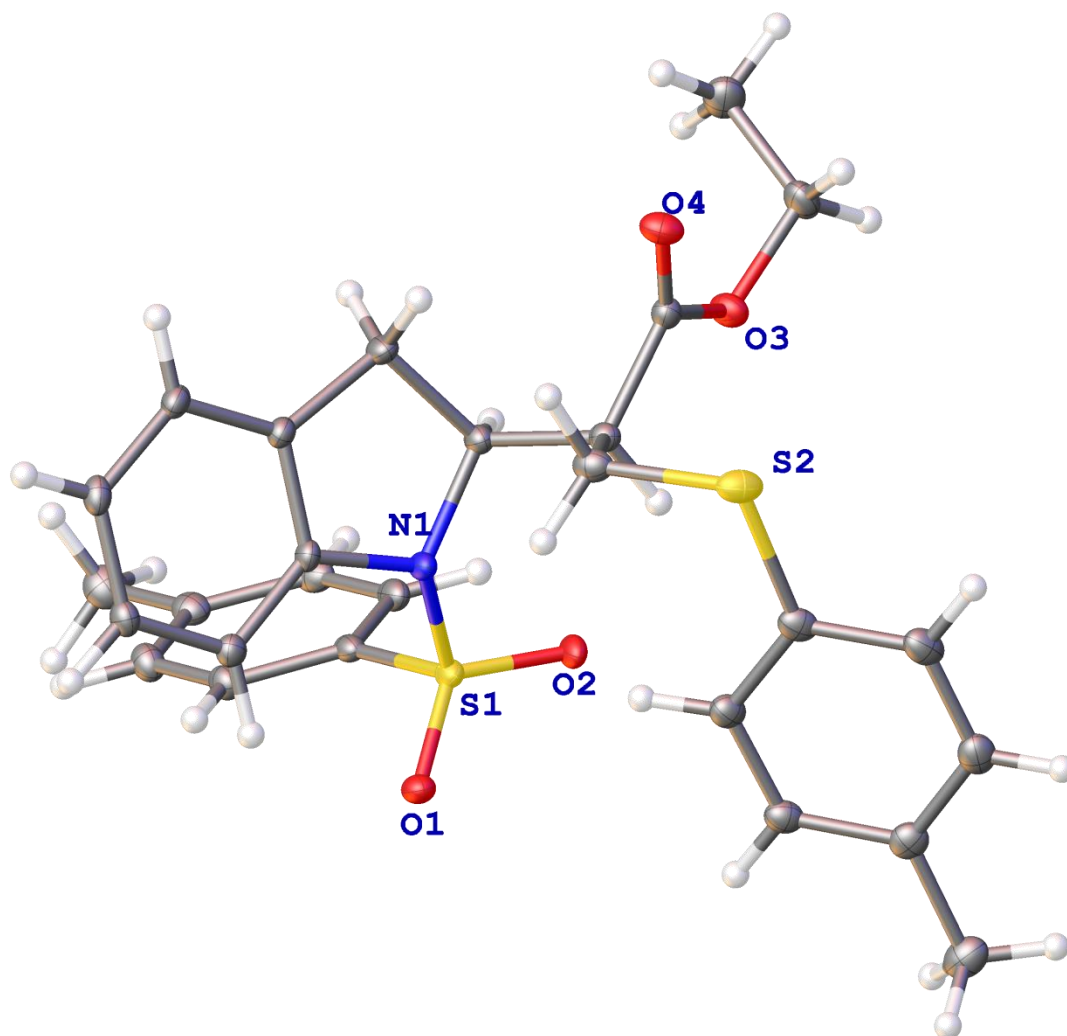

**Figure S2.** X-ray structure of **4** (ellipsoid contour at 50% probability CCDC 2293949)

**Crystal Growth Method:** 5 mg of **3a'** was added in a HPLC vial and dissolved by 1.0 mL DCM, closed the lid. Then put it in a large bottle, added PE to the same level of the liquid in the HPLC vial, tighten the lid, put it in a fumehood and waited for growth.

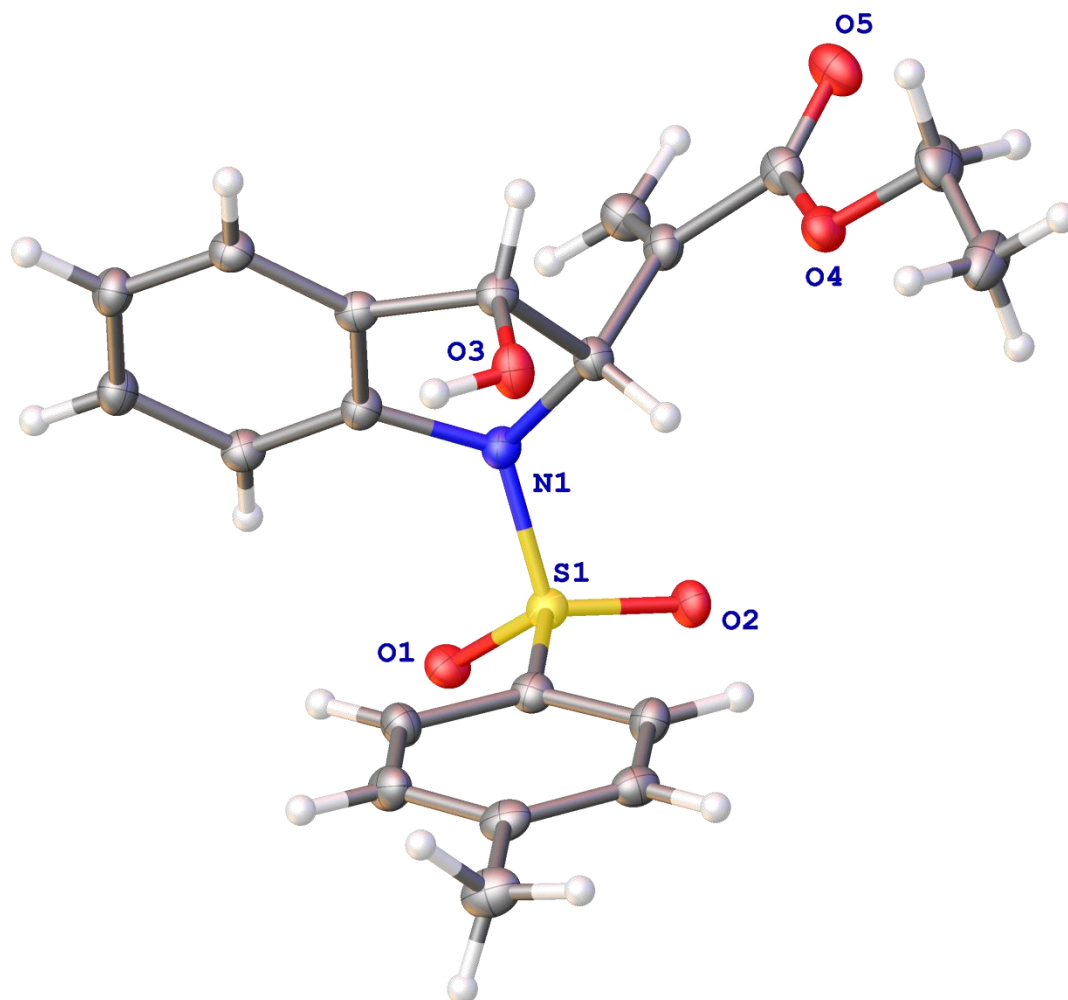

**Figure S3.** X-ray structure of **3a'** (ellipsoid contour at 50% probability CCDC 2325027)

**Table S1.** Crystal data and structure refinement for **3j**, **4**, and **3a'**.

| Identification code                         | <b>3j</b>                                                        | <b>4</b>                                                         | <b>3a'</b>                                                       |
|---------------------------------------------|------------------------------------------------------------------|------------------------------------------------------------------|------------------------------------------------------------------|
| Empirical formula                           | C <sub>19</sub> H <sub>19</sub> NO <sub>4</sub> S                | C <sub>27</sub> H <sub>29</sub> NO <sub>4</sub> S <sub>2</sub>   | C <sub>20</sub> H <sub>21</sub> NO <sub>5</sub> S                |
| Formula weight                              | 357.41                                                           | 495.63                                                           | 387.44                                                           |
| Temperature/K                               | 150.00(10)                                                       | 100.0(6)                                                         | 99.97(15)                                                        |
| Crystal system                              | monoclinic                                                       | monoclinic                                                       | triclinic                                                        |
| Space group                                 | P2 <sub>1</sub> /c                                               | P2 <sub>1</sub> /n                                               | P-1                                                              |
| a/Å                                         | 8.30100(10)                                                      | 9.24180(10)                                                      | 8.0093(9)                                                        |
| b/Å                                         | 11.06510(10)                                                     | 19.5215(3)                                                       | 9.9303(10)                                                       |
| c/Å                                         | 18.7113(2)                                                       | 14.0366(2)                                                       | 13.0524(6)                                                       |
| α/°                                         | 90                                                               | 90                                                               | 92.274(6)                                                        |
| β/°                                         | 93.4680(10)                                                      | 99.178(2)                                                        | 107.728(8)                                                       |
| γ/°                                         | 90                                                               | 90                                                               | 106.033(10)                                                      |
| Volume/Å <sup>3</sup>                       | 1715.51(3)                                                       | 2499.98(6)                                                       | 941.63(16)                                                       |
| Z                                           | 4                                                                | 4                                                                | 2                                                                |
| P <sub>calc</sub> (g/cm <sup>3</sup> )      | 1.384                                                            | 1.317                                                            | 1.366                                                            |
| μ/mm <sup>-1</sup>                          | 1.884                                                            | 2.204                                                            | 1.800                                                            |
| F(000)                                      | 752.0                                                            | 1048.0                                                           | 408.0                                                            |
| Crystal size/mm <sup>3</sup>                | 0.15 × 0.12 × 0.1                                                | 0.16 × 0.14 × 0.12                                               | 0.15 × 0.14 × 0.1                                                |
| Radiation                                   | Cu Kα (λ = 1.54184)                                              | Cu Kα (λ = 1.54184)                                              | Cu Kα (λ = 1.54184)                                              |
| 2θ range for data collection/°              | 9.29 to 148.79                                                   | 7.824 to 148.864                                                 | 7.176 to 150.146                                                 |
| Index ranges                                | -10 ≤ h ≤ 9,<br>-13 ≤ k ≤ 13,<br>-22 ≤ l ≤ 22                    | -9 ≤ h ≤ 11,<br>-22 ≤ k ≤ 23,<br>-17 ≤ l ≤ 14                    | -6 ≤ h ≤ 9,<br>-12 ≤ k ≤ 12,<br>-15 ≤ l ≤ 16                     |
| Reflections collected                       | 18184                                                            | 13621                                                            | 7837                                                             |
| Independent reflections                     | 3454 [R <sub>int</sub> = 0.0211,<br>R <sub>sigma</sub> = 0.0120] | 4968 [R <sub>int</sub> = 0.0430,<br>R <sub>sigma</sub> = 0.0514] | 3580 [R <sub>int</sub> = 0.0590,<br>R <sub>sigma</sub> = 0.0619] |
| Data/restraints/parameters                  | 3454/0/228                                                       | 4968/0/310                                                       | 3580/0/255                                                       |
| Goodness-of-fit on F <sup>2</sup>           | 1.033                                                            | 1.096                                                            | 1.162                                                            |
| Final R indexes [I ≥ 2σ (I)]                | R <sub>1</sub> = 0.0297,<br>wR <sub>2</sub> = 0.0770             | R <sub>1</sub> = 0.0453,<br>wR <sub>2</sub> = 0.1197             | R <sub>1</sub> = 0.0793,<br>wR <sub>2</sub> = 0.2277             |
| Final R indexes [all data]                  | R <sub>1</sub> = 0.0301,<br>wR <sub>2</sub> = 0.0772             | R <sub>1</sub> = 0.0548,<br>wR <sub>2</sub> = 0.1248             | R <sub>1</sub> = 0.0908,<br>wR <sub>2</sub> = 0.2536             |
| Largest diff. peak/hole / e Å <sup>-3</sup> | 0.28/-0.37                                                       | 0.38/-0.49                                                       | 1.02/-1.27                                                       |



## VIII. Copies of $^1\text{H}$ and $^{13}\text{C}\{^1\text{H}\}$ NMR Spectra

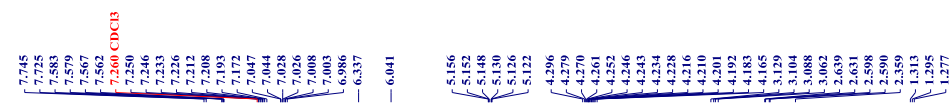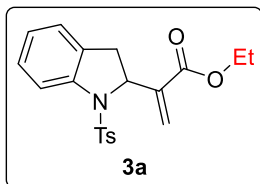

$^1\text{H}$  NMR (400 MHz,  $\text{CDCl}_3$ )

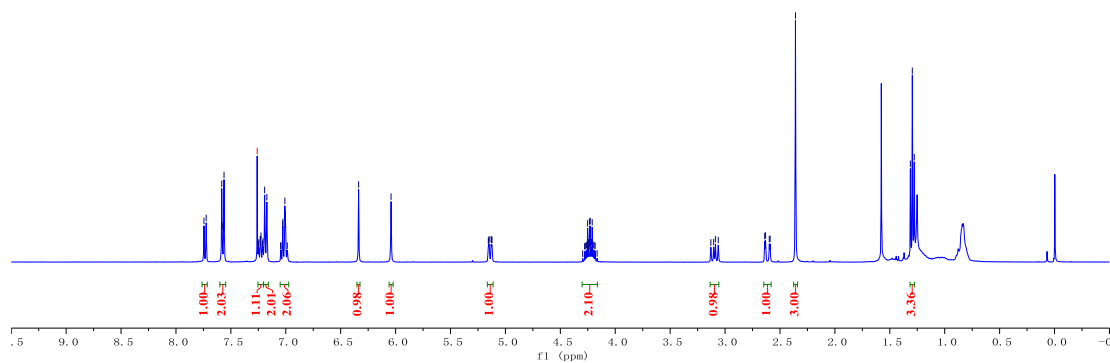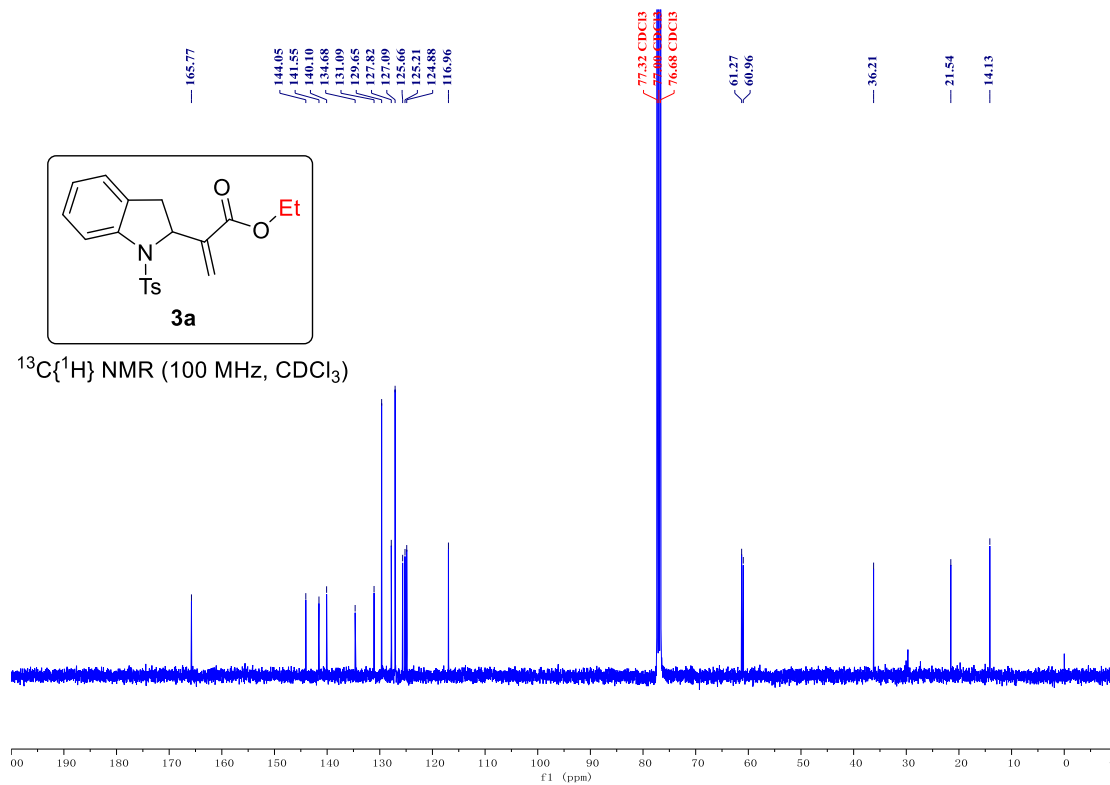



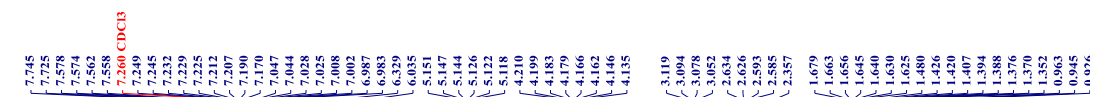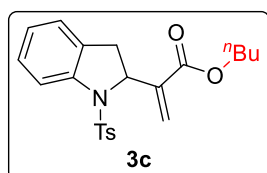

$^1\text{H}$  NMR (400 MHz,  $\text{CDCl}_3$ )

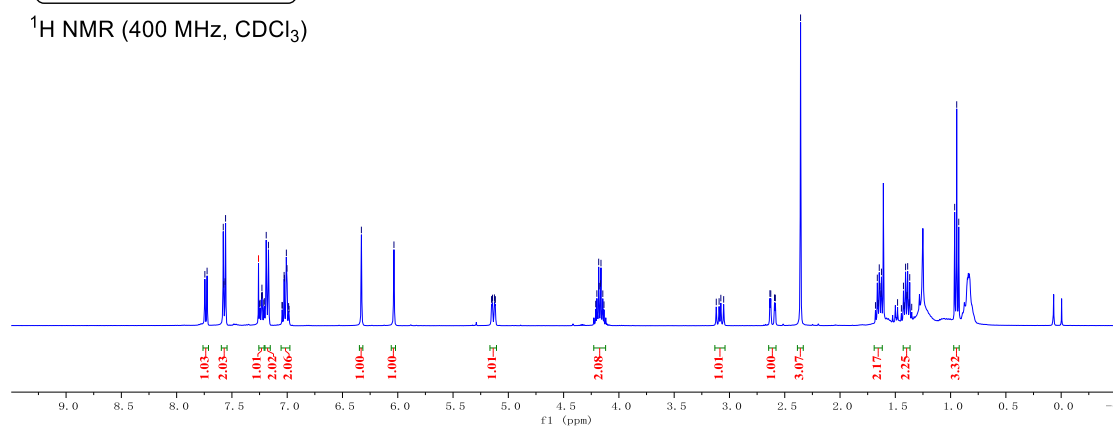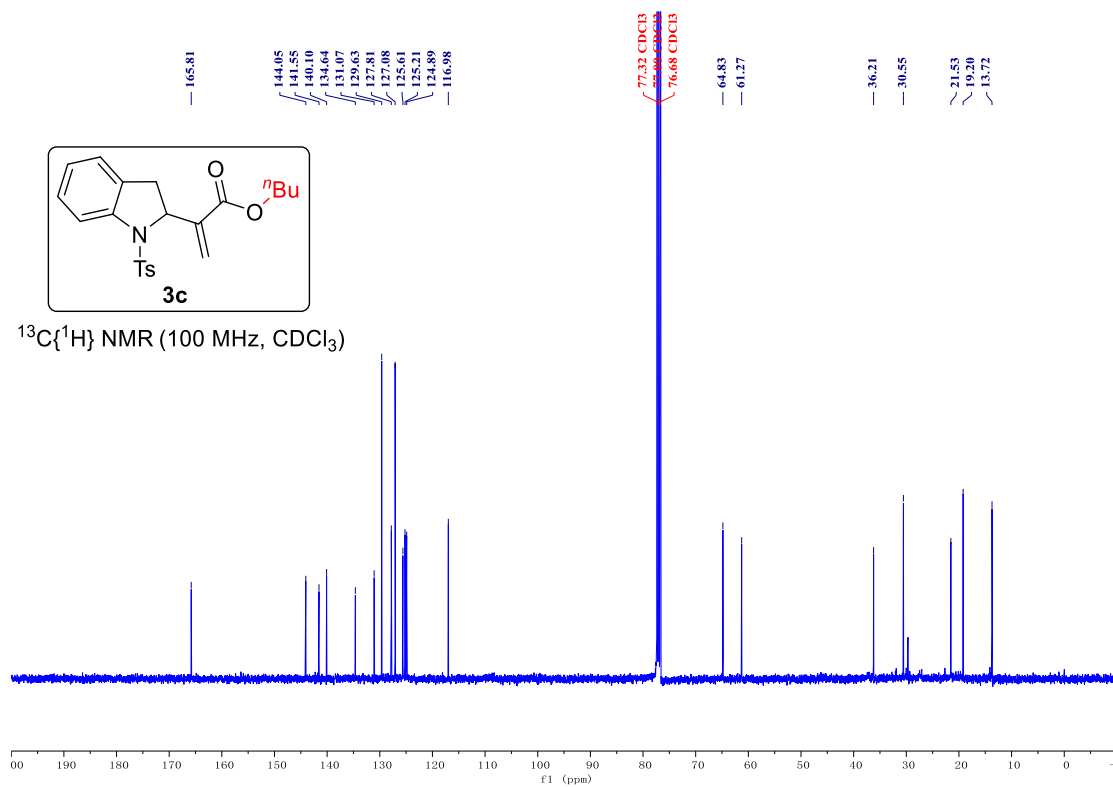

$^{13}\text{C}\{^1\text{H}\}$  NMR (100 MHz,  $\text{CDCl}_3$ )

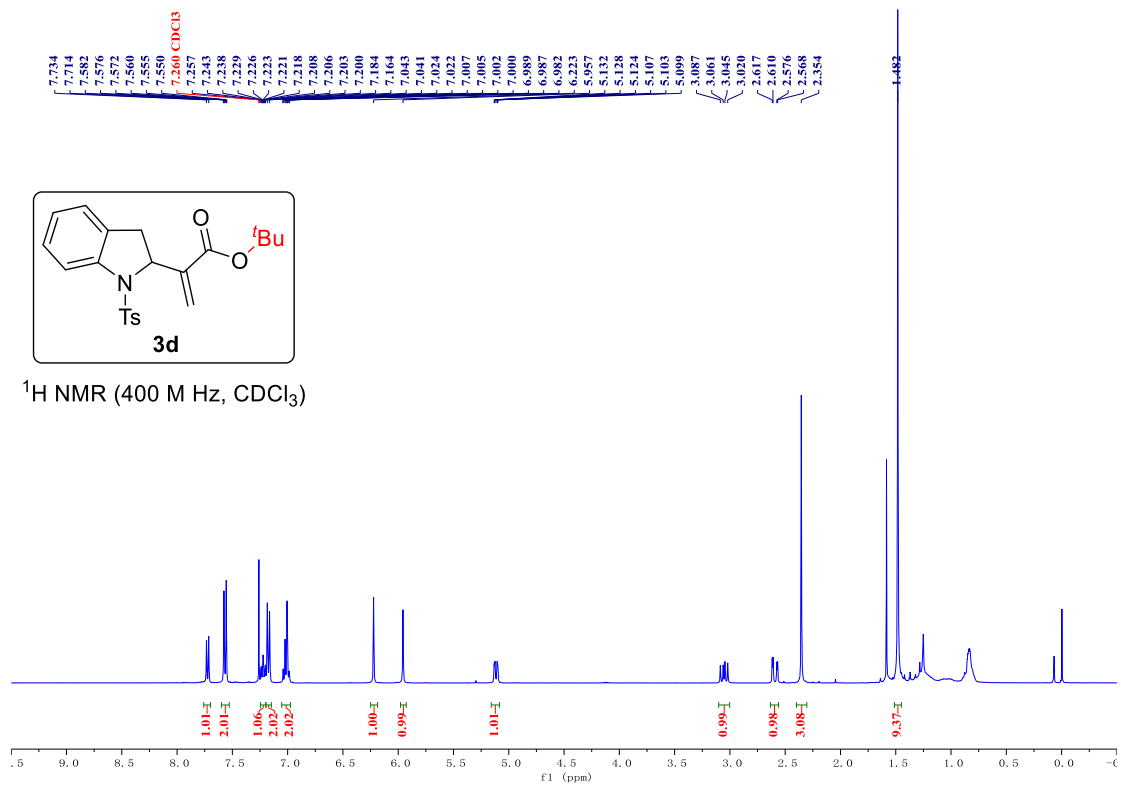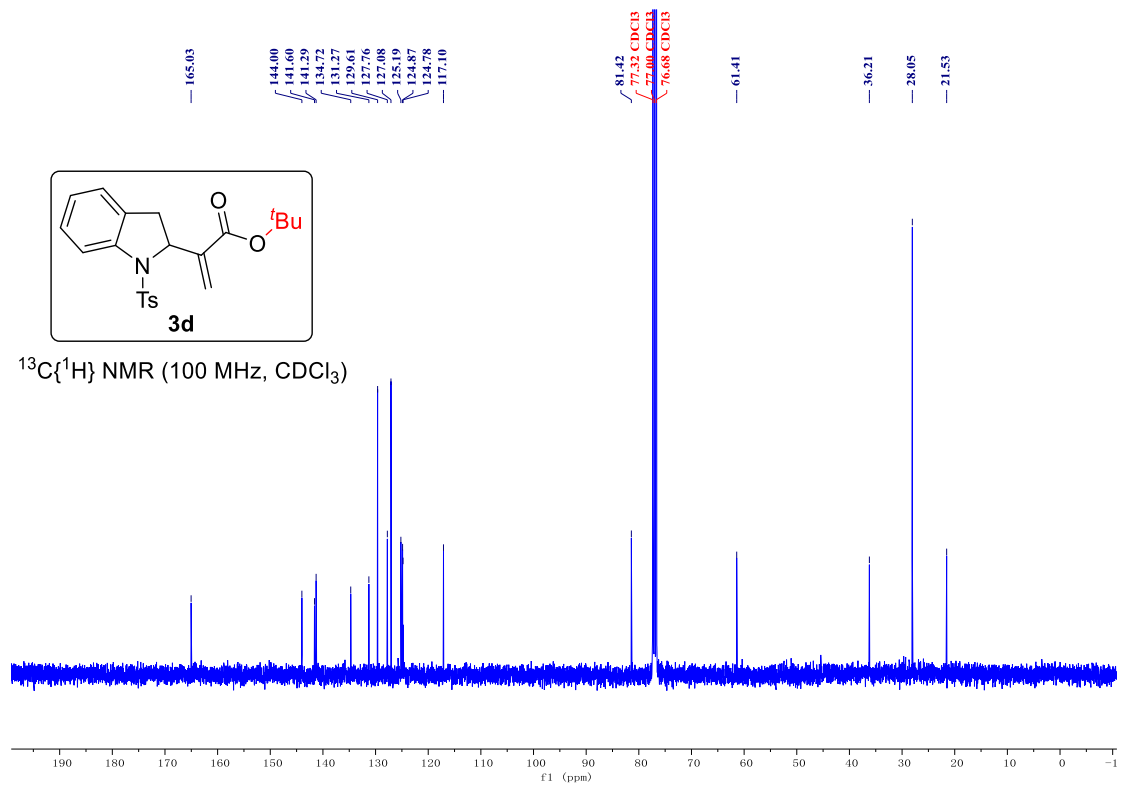

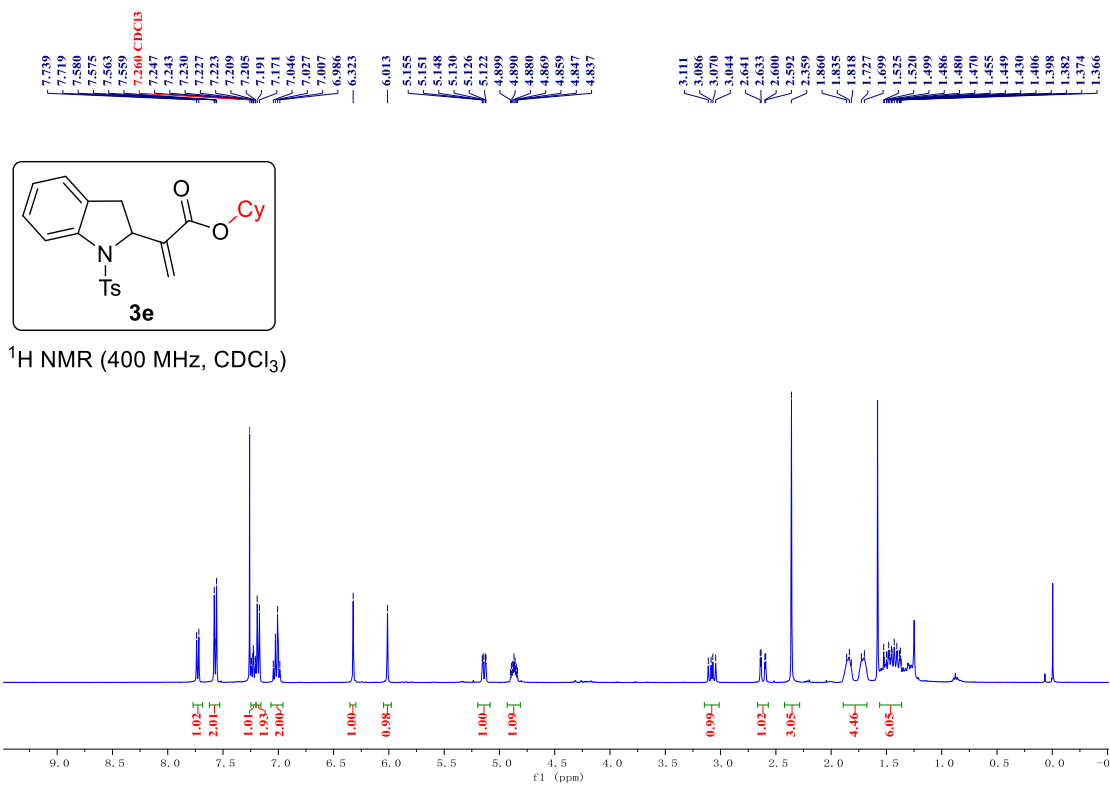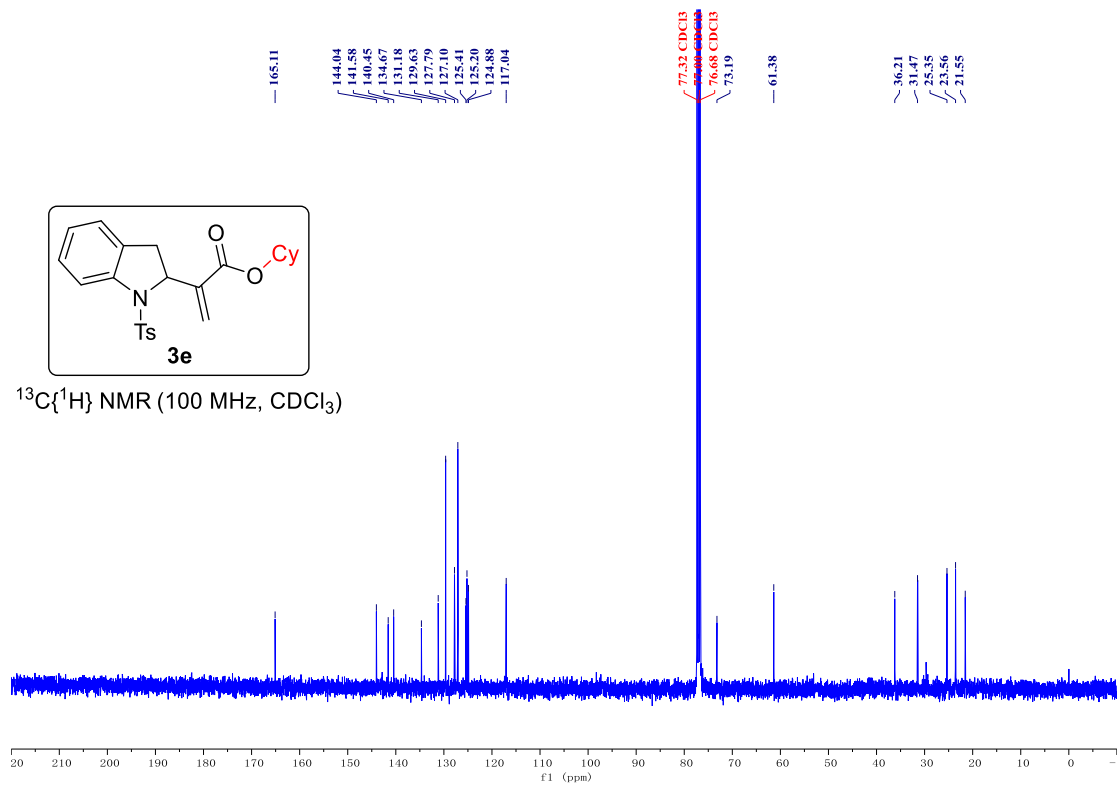

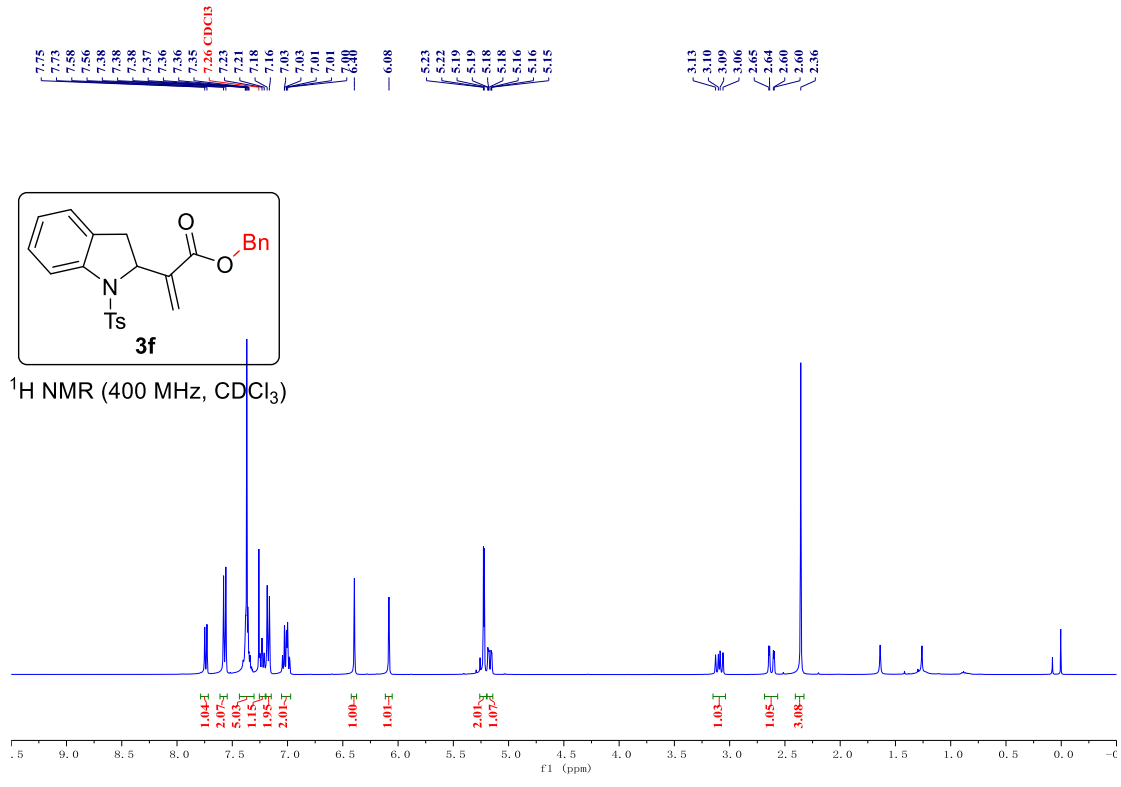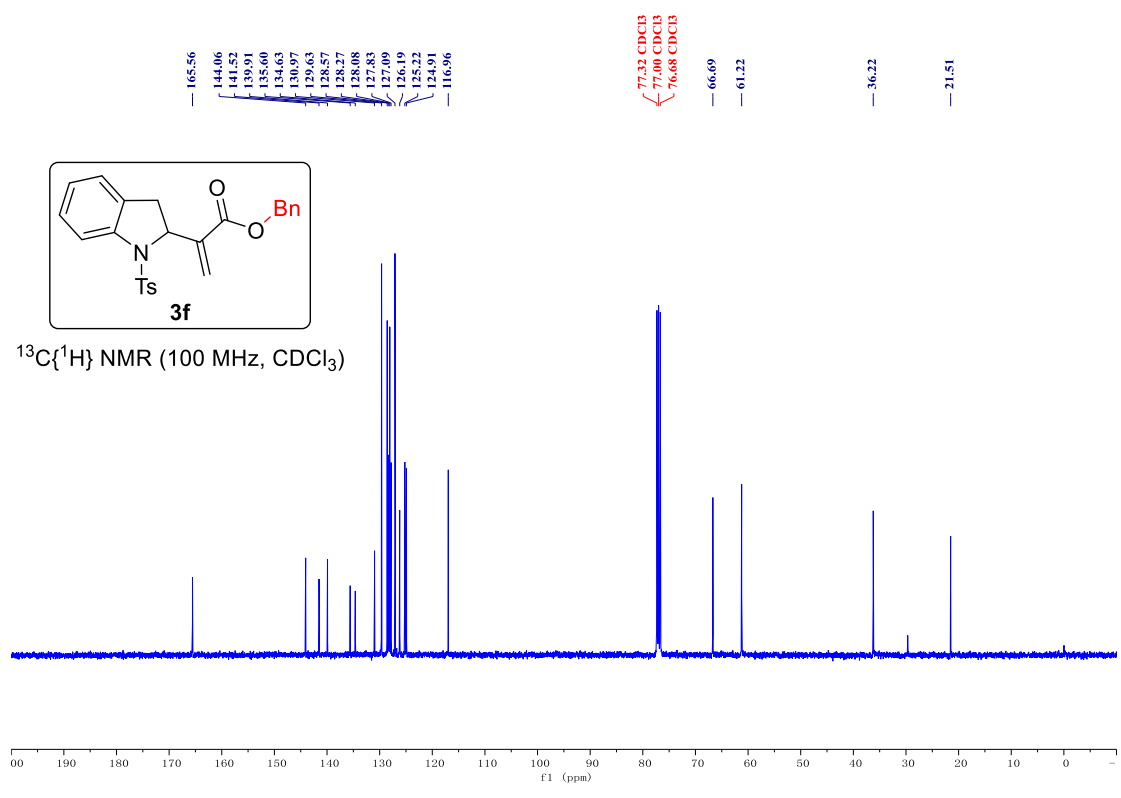

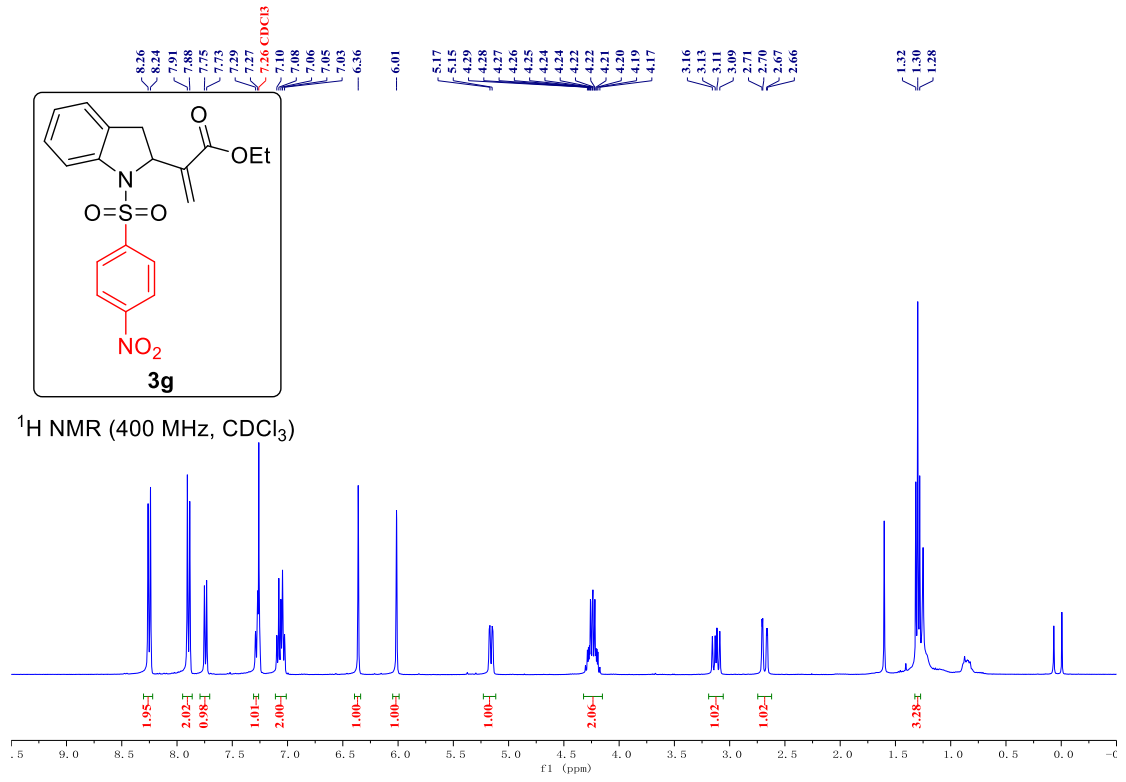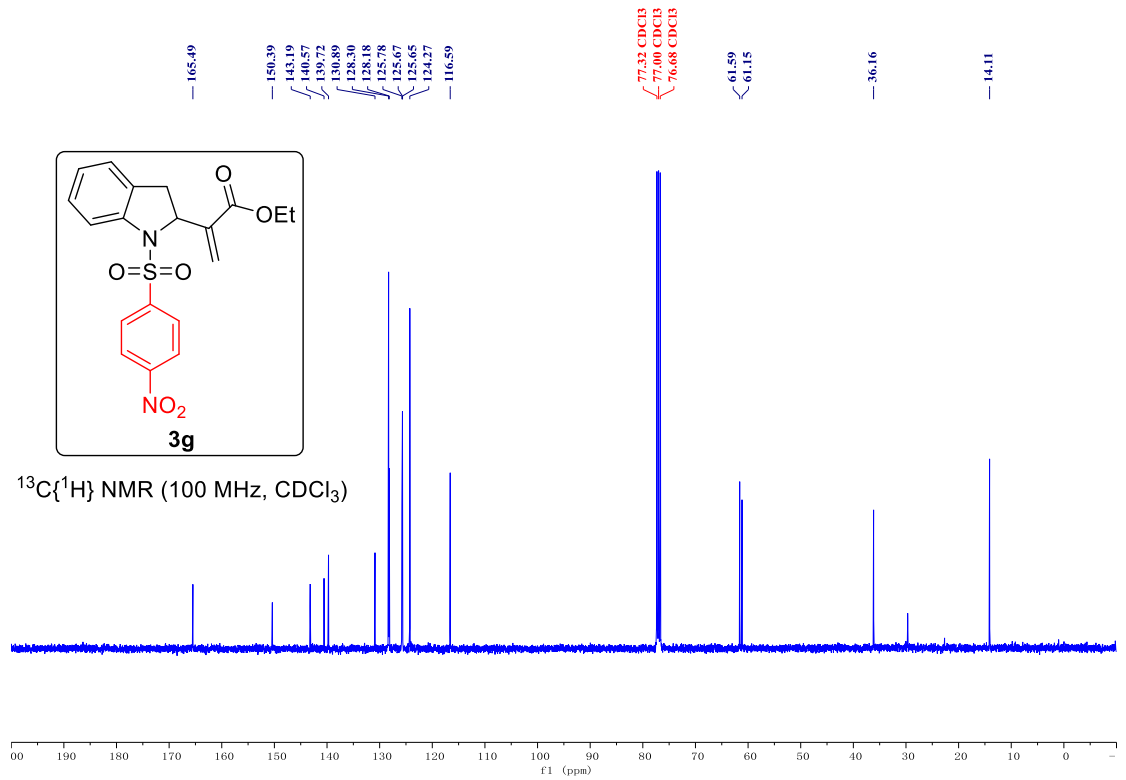

8.236  
8.232  
8.216  
8.212  
7.671  
7.652  
7.455  
7.452  
7.436  
7.433  
7.416  
7.413  
7.378  
7.377  
7.359  
7.354  
7.340  
7.335  
7.276  
7.260 CDCl3  
7.090  
7.071  
7.053  
6.961  
6.943  
6.924  
6.319  
6.015  
6.012  
5.760  
5.735  
4.308  
4.290  
4.281  
4.281  
4.272  
4.263  
4.258  
4.245  
4.240  
4.227  
4.222  
4.213  
4.205  
4.195  
4.177  
3.651  
3.626  
3.610  
3.585  
2.829  
2.824  
2.788  
2.783  
1.320  
1.302  
1.284

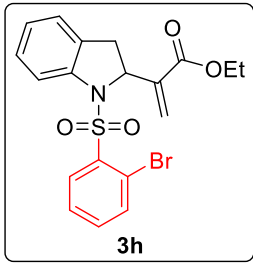

$^1\text{H NMR}$  (400 MHz,  $\text{CDCl}_3$ )

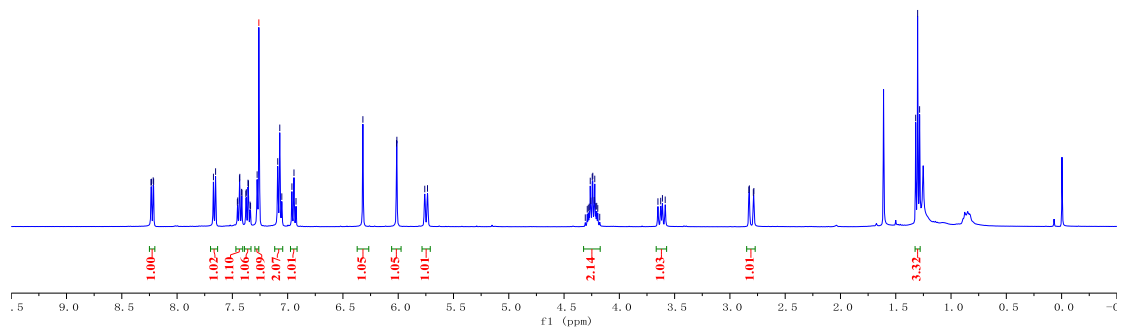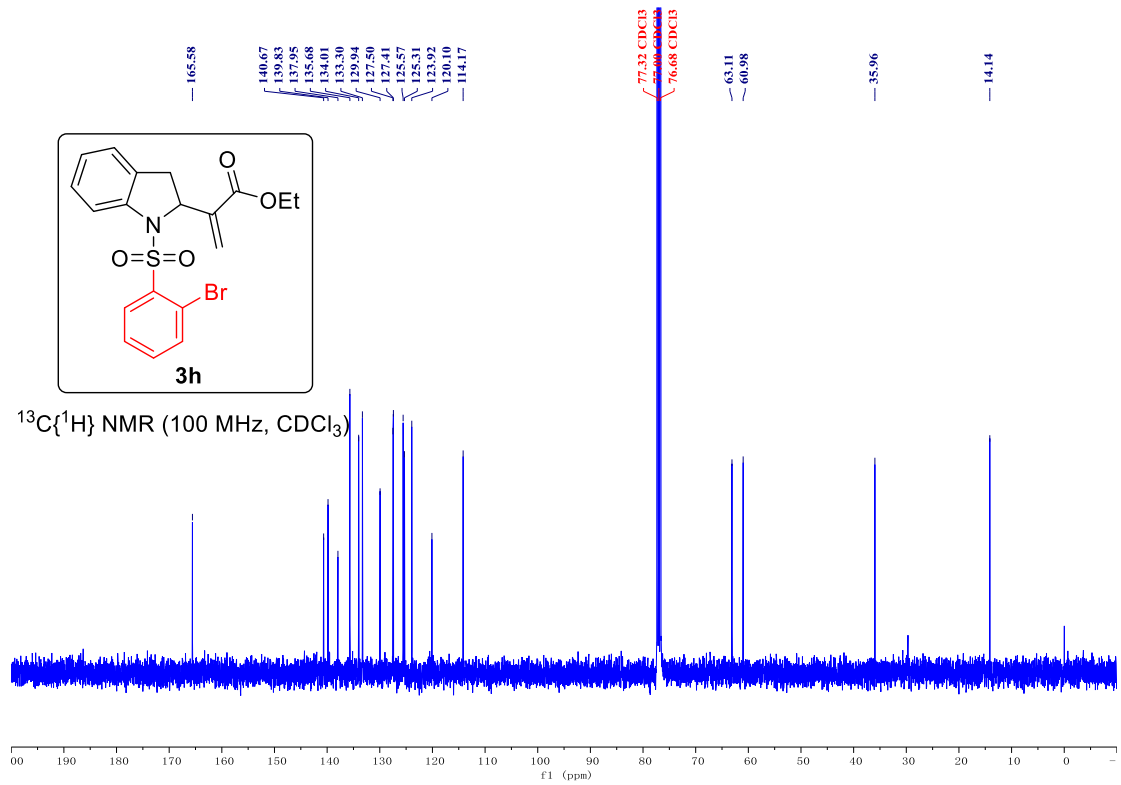



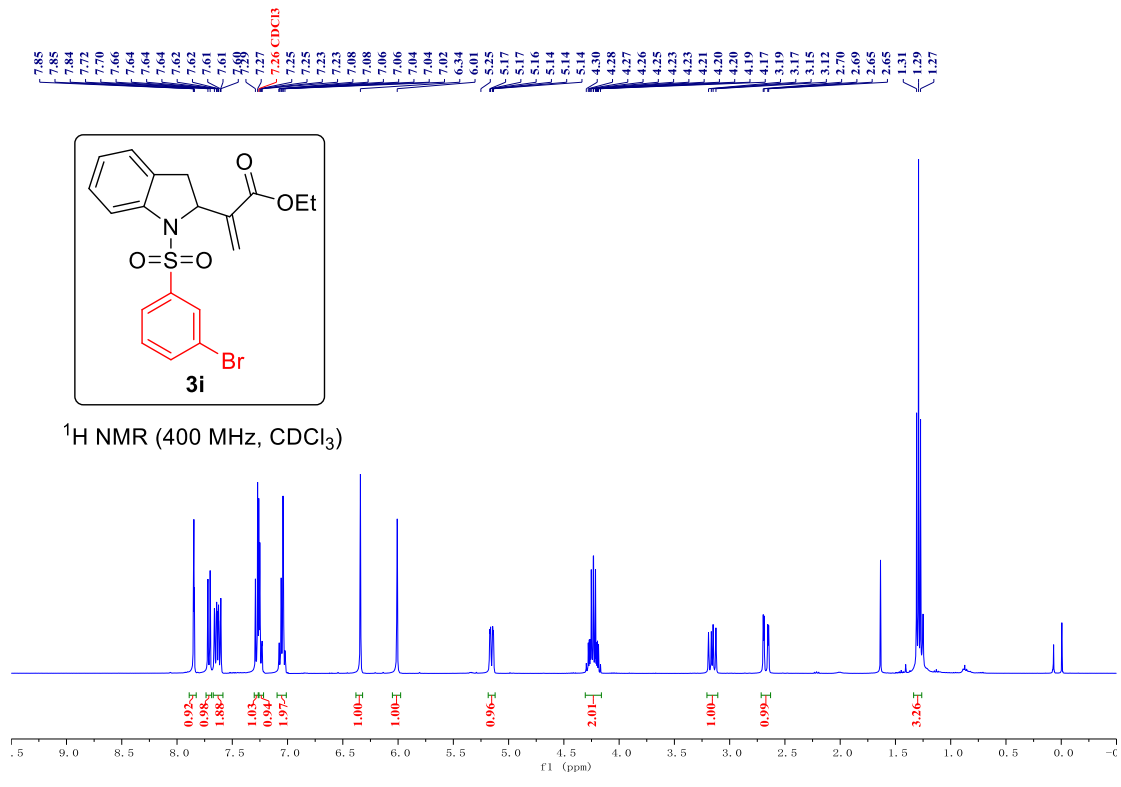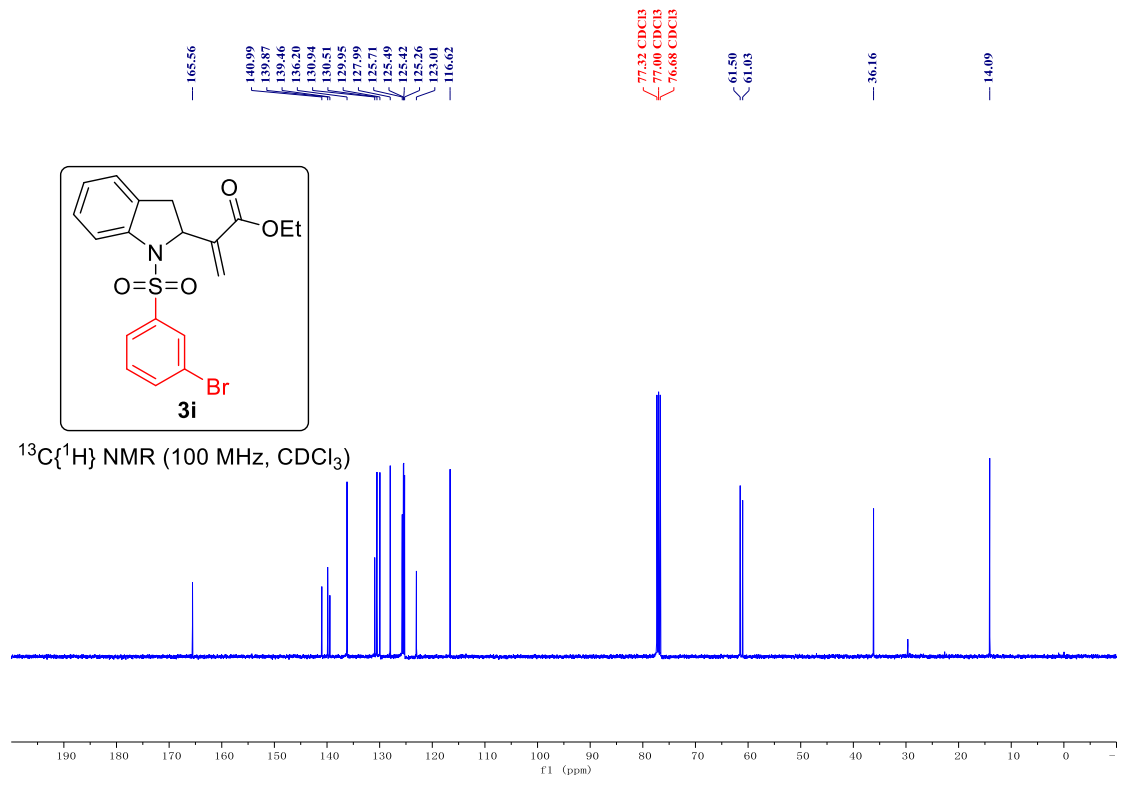

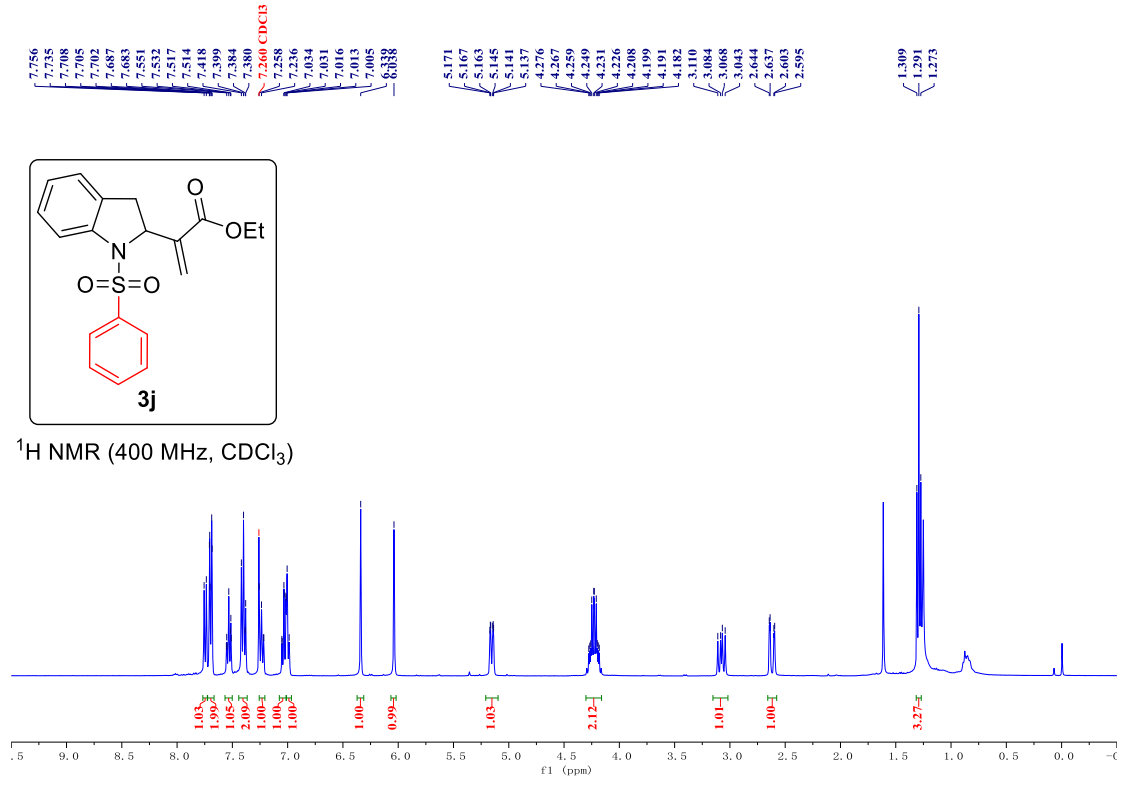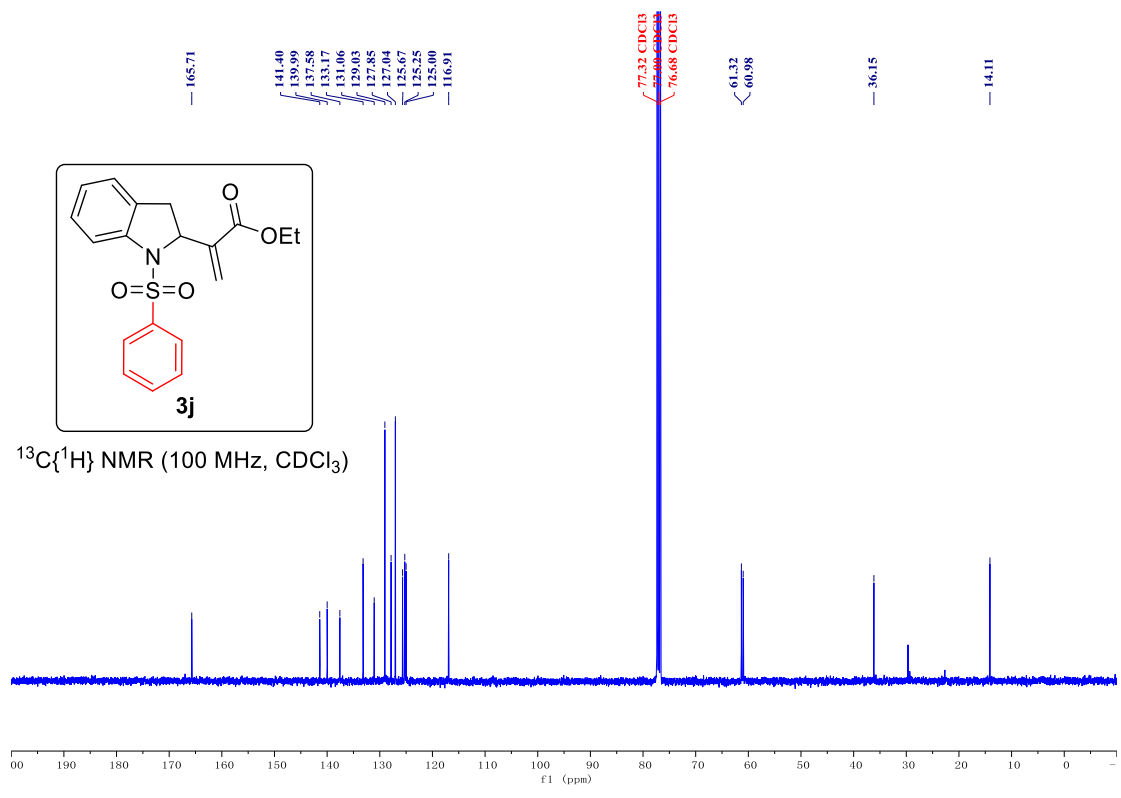

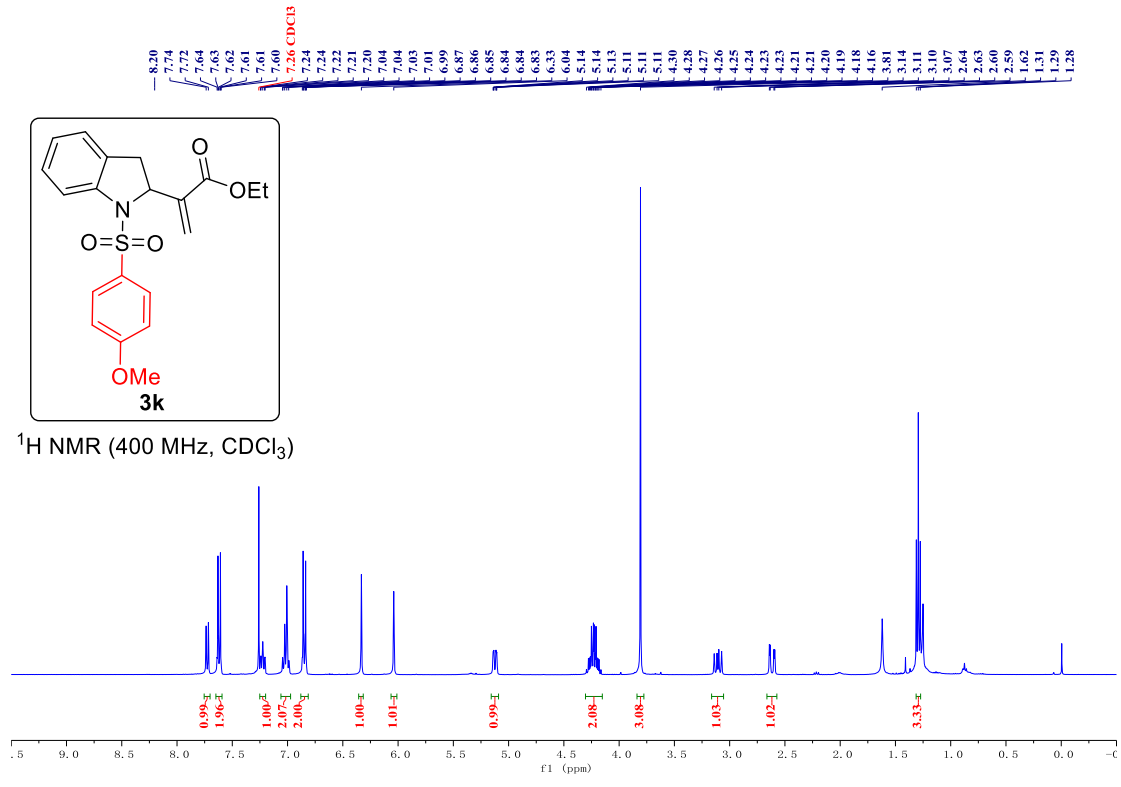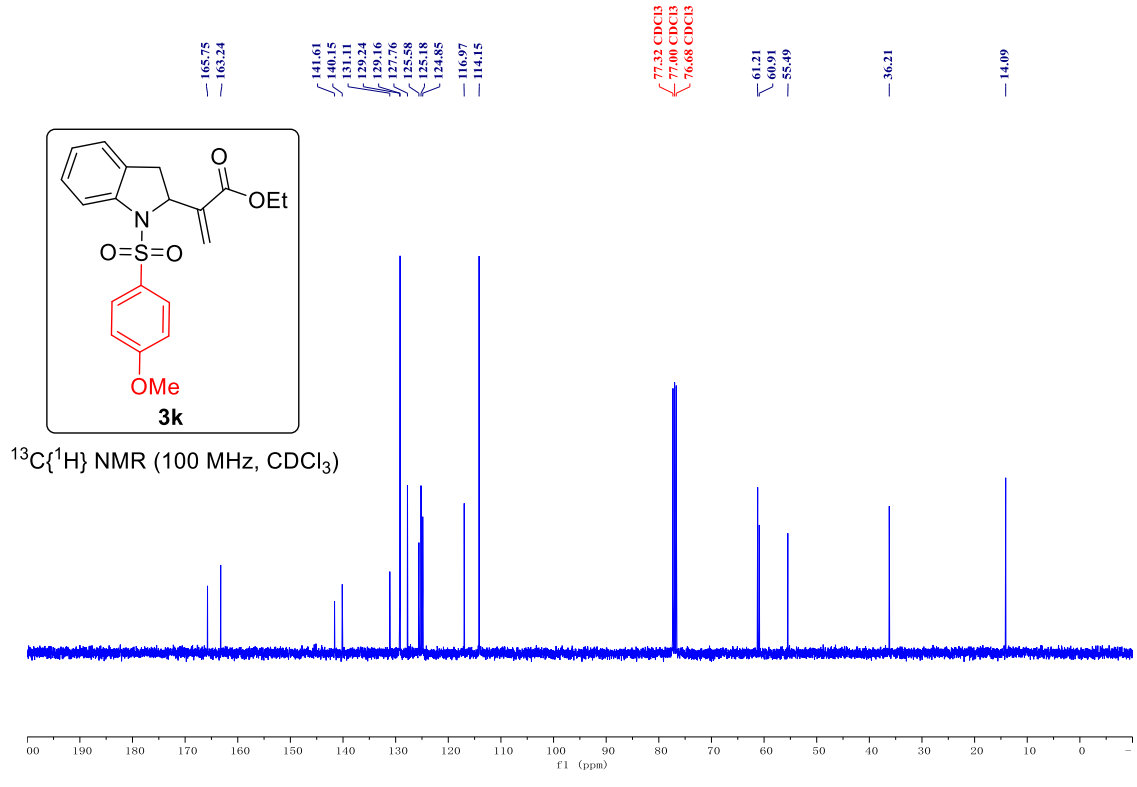

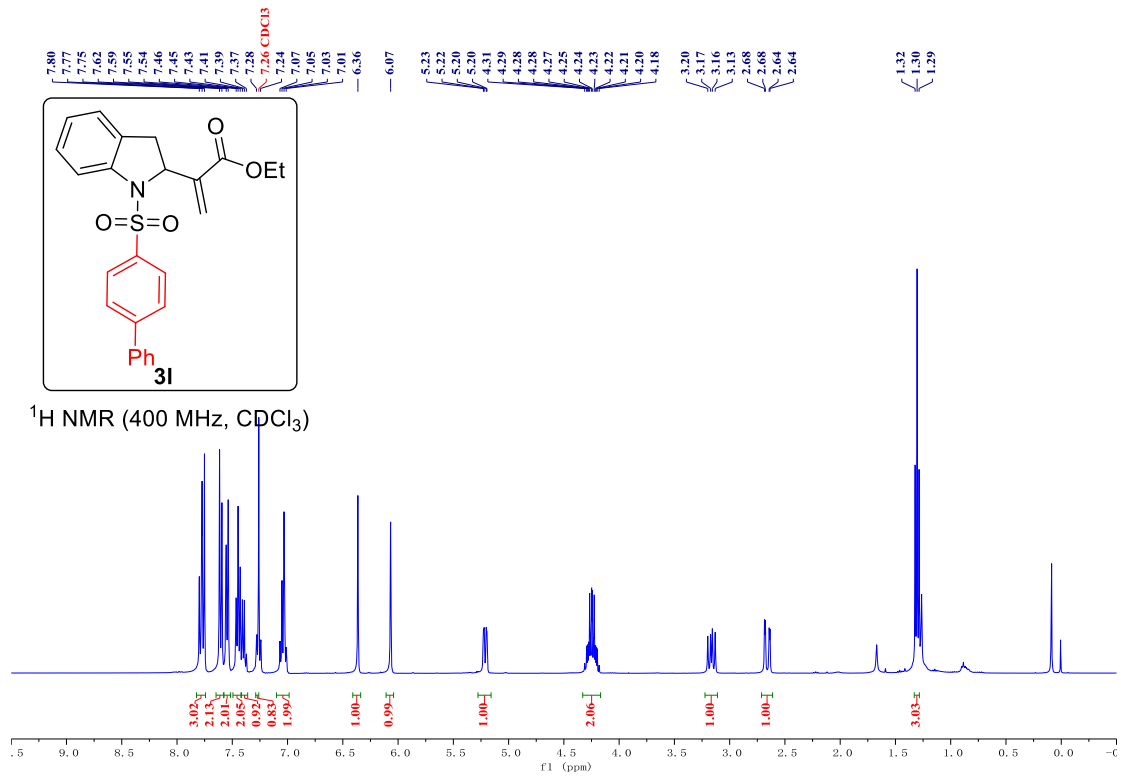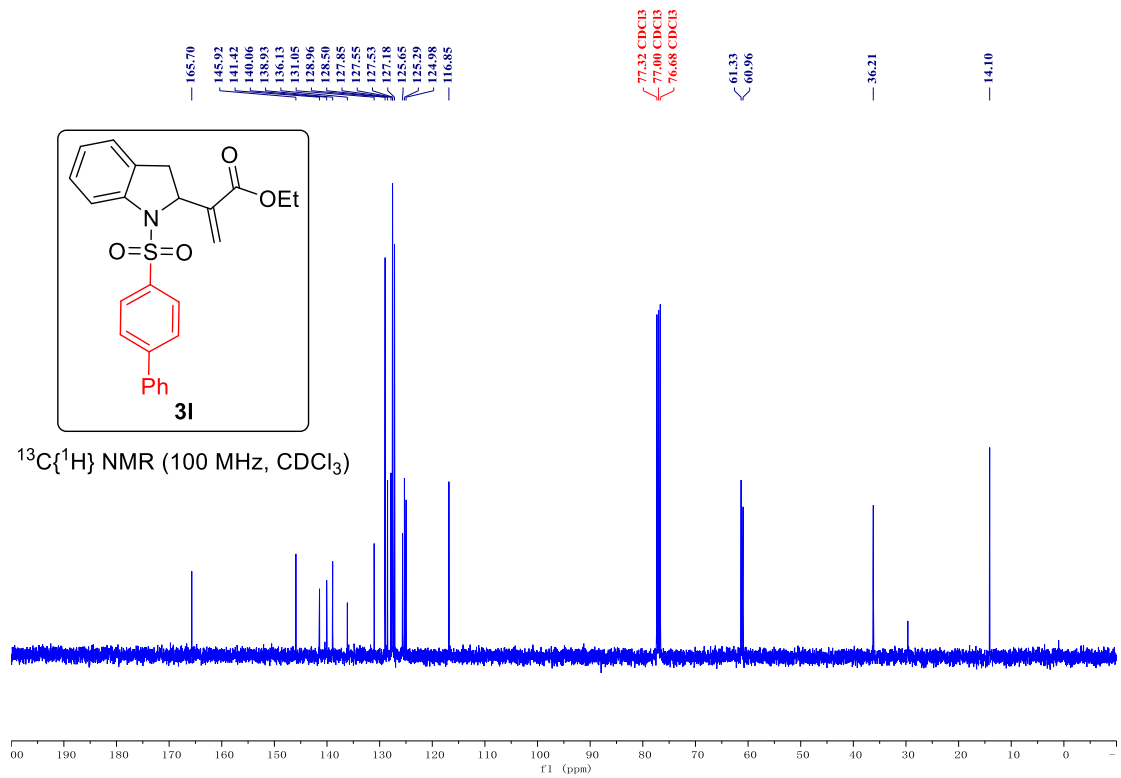

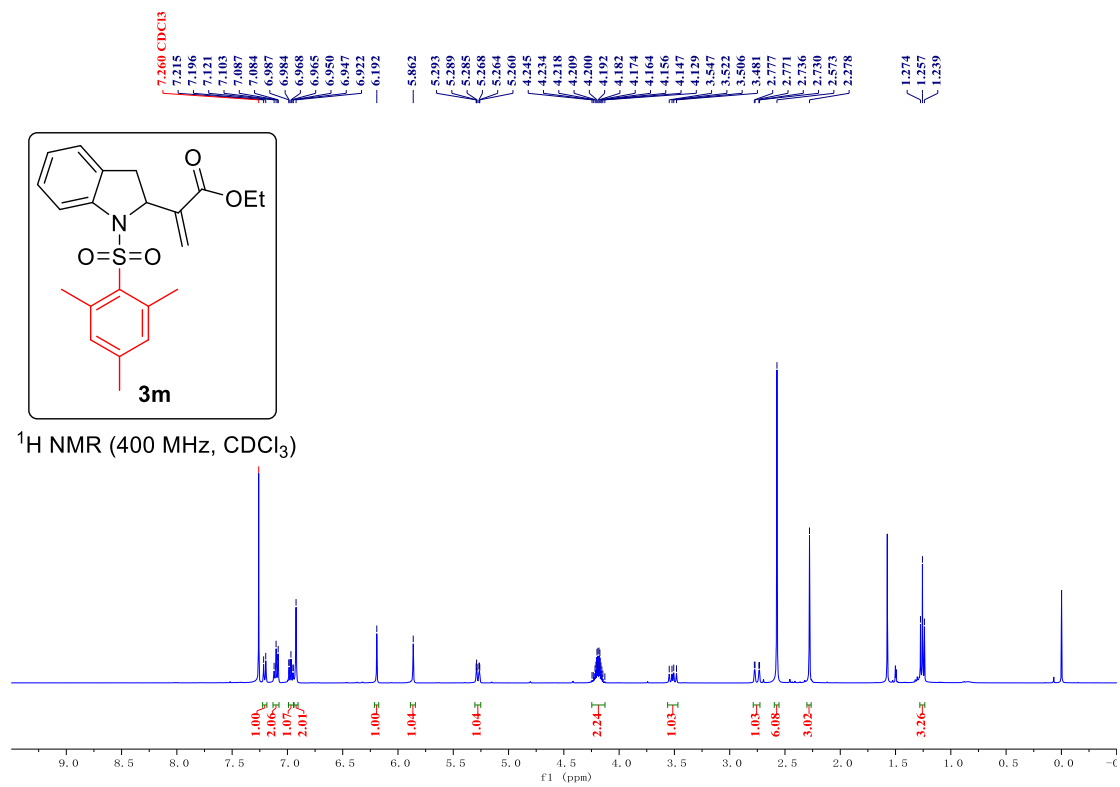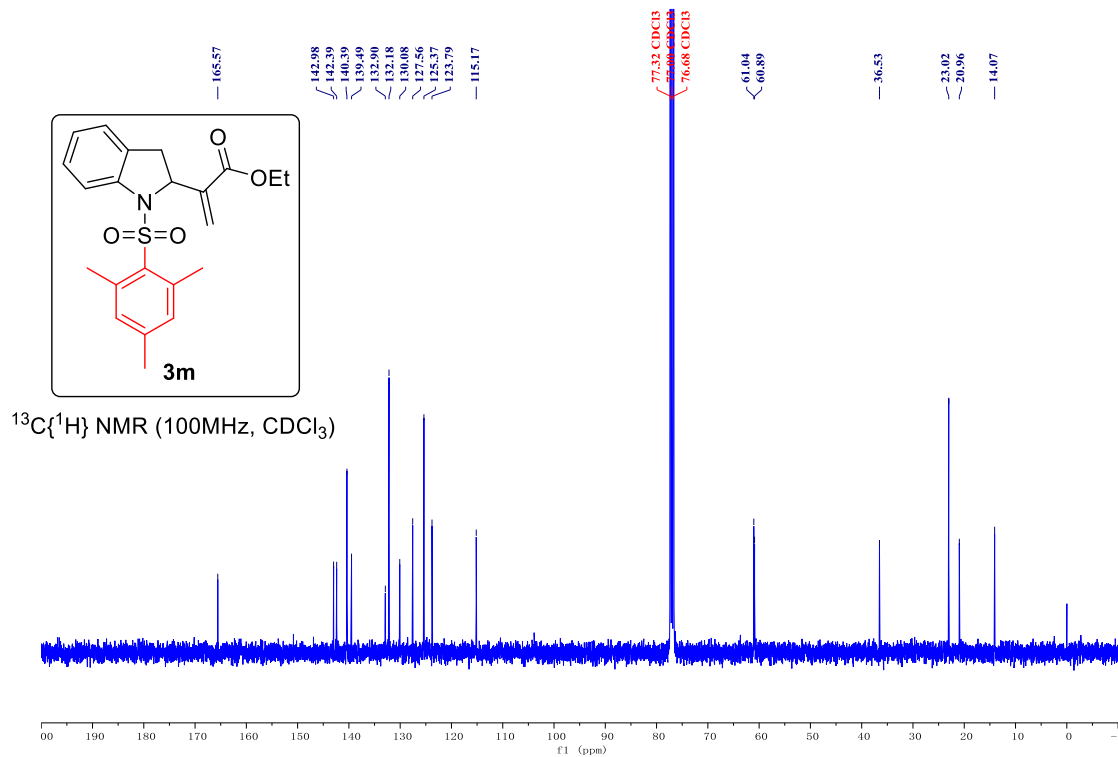

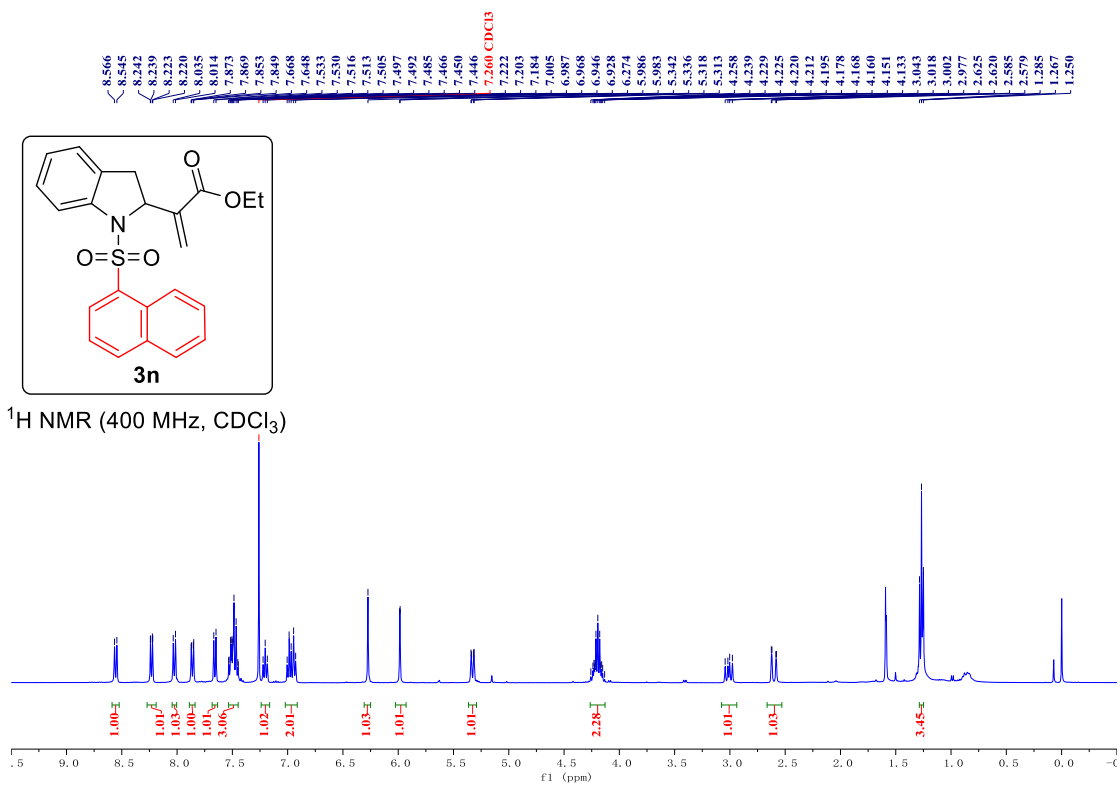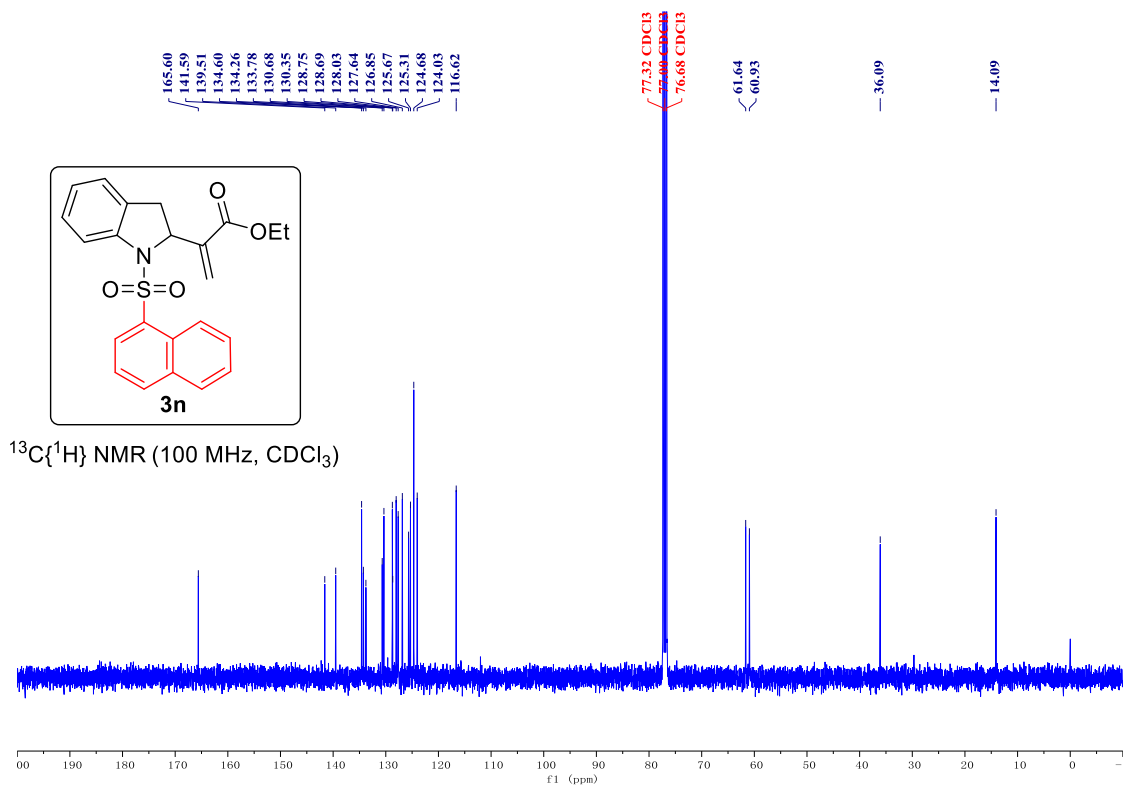

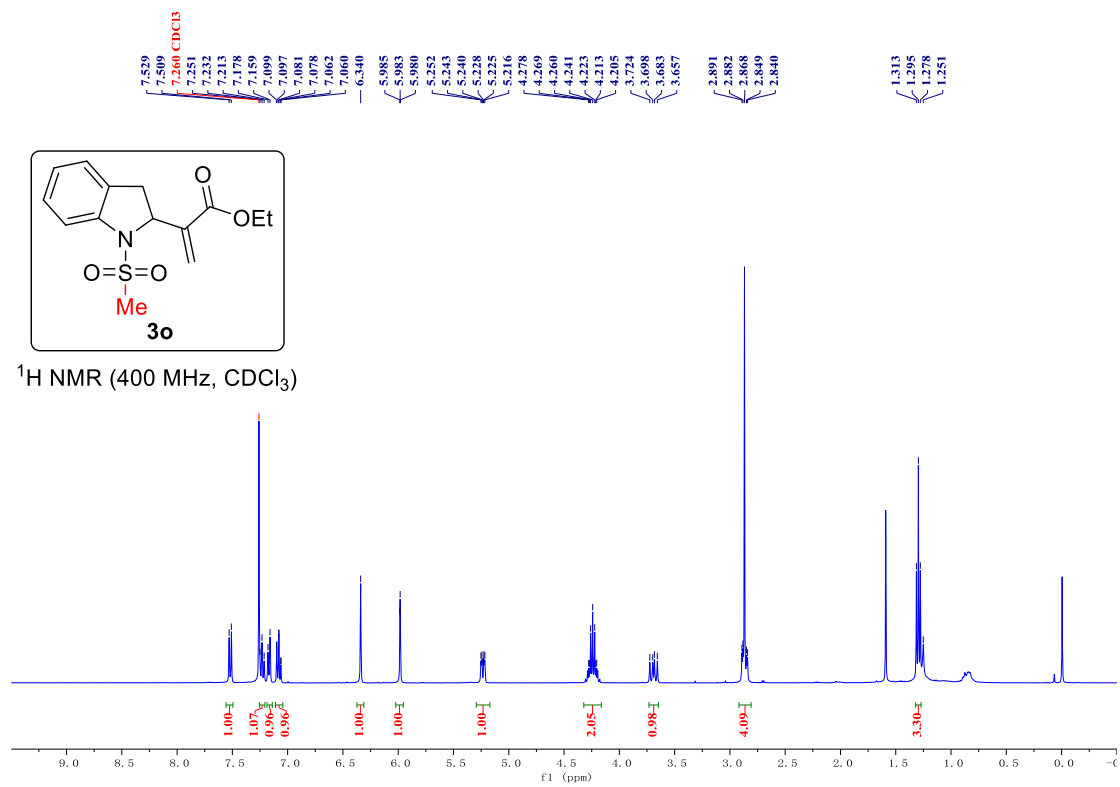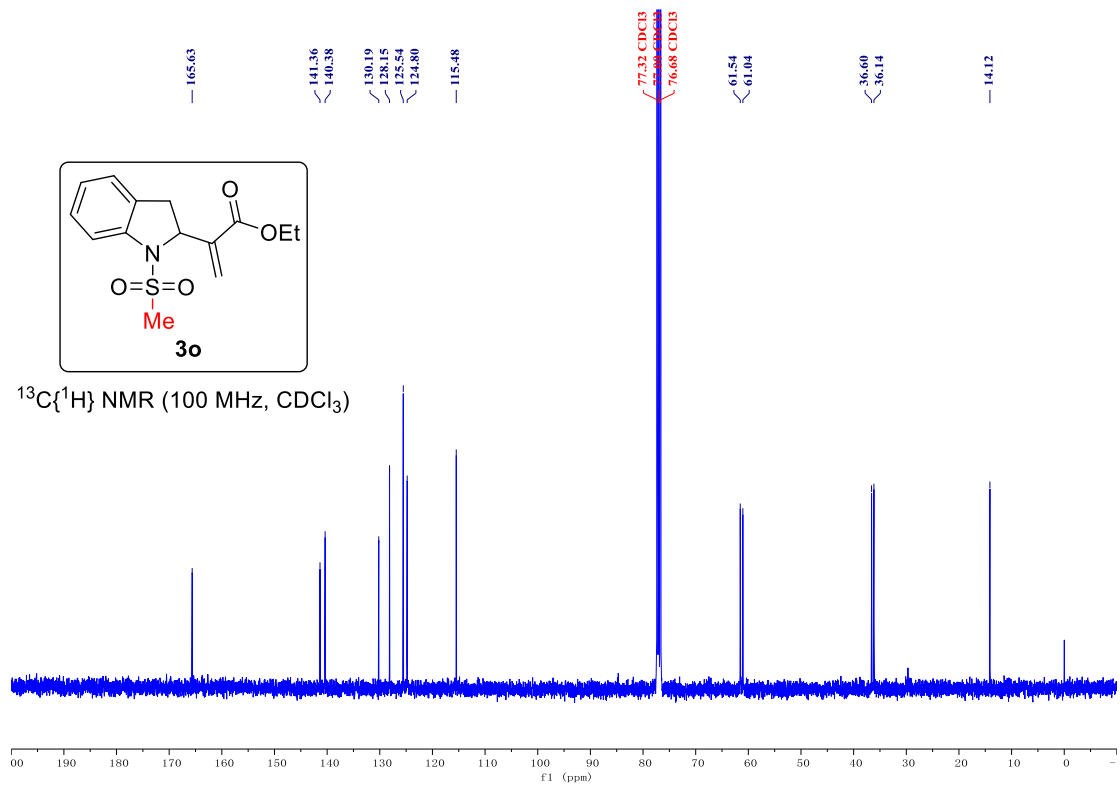

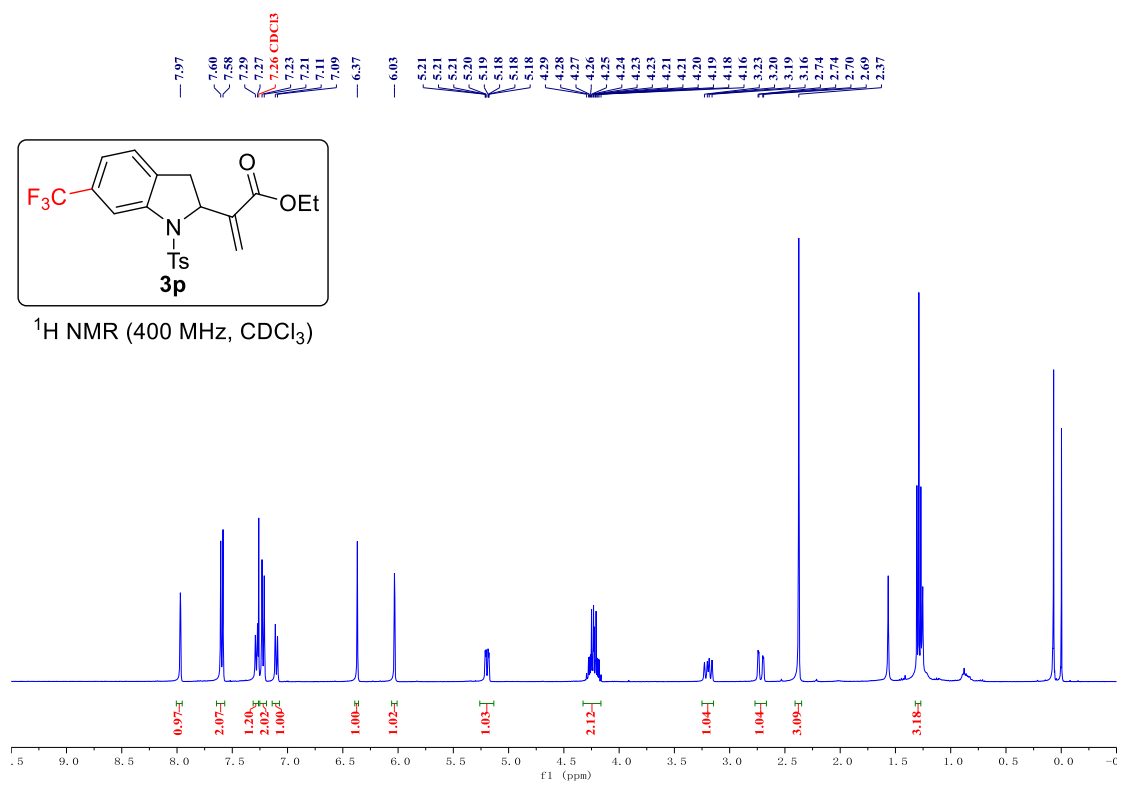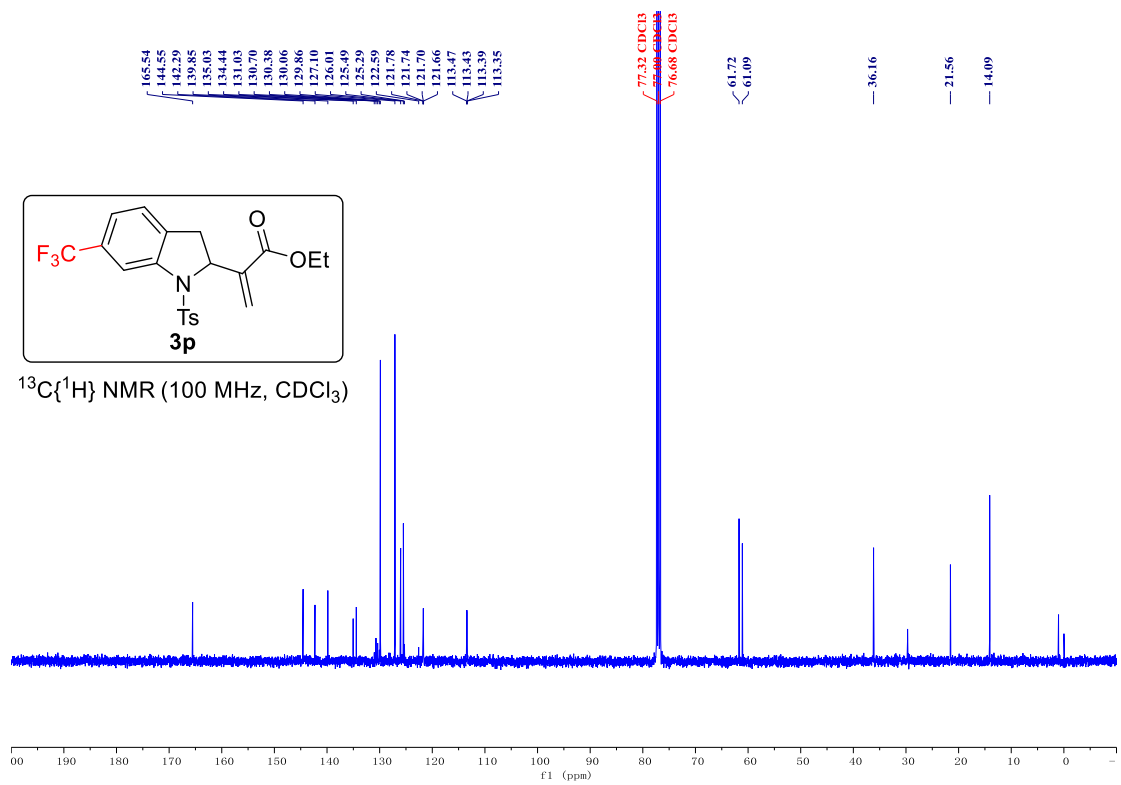



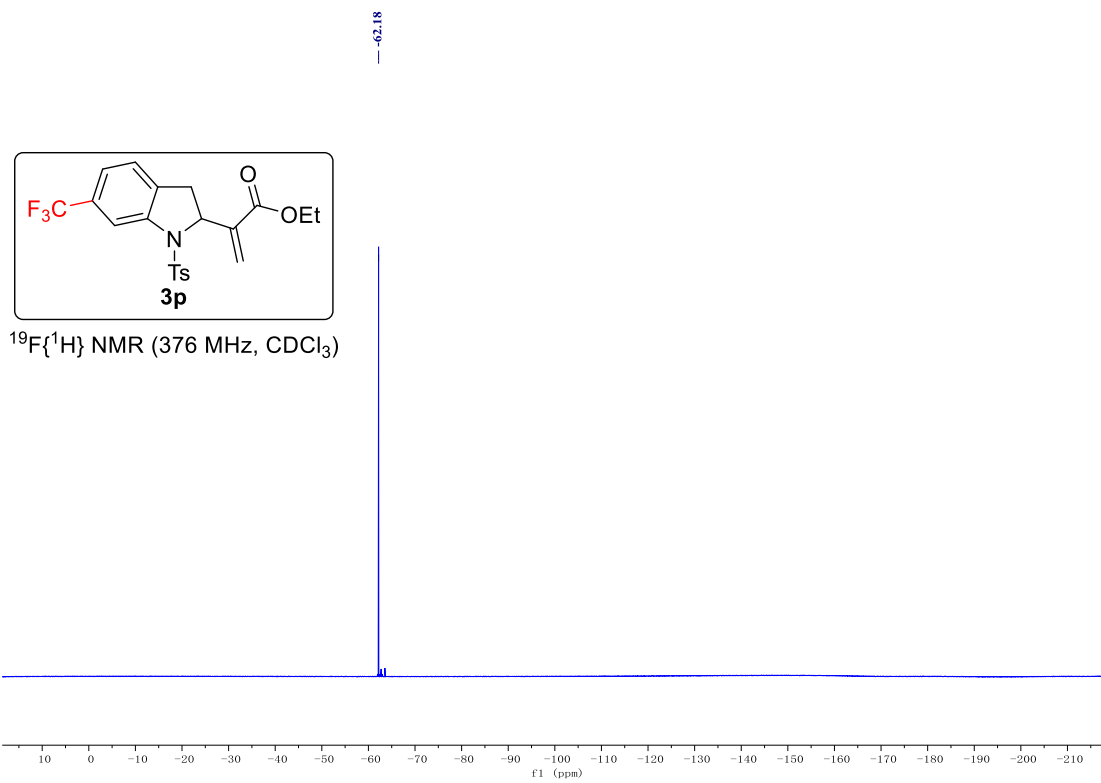

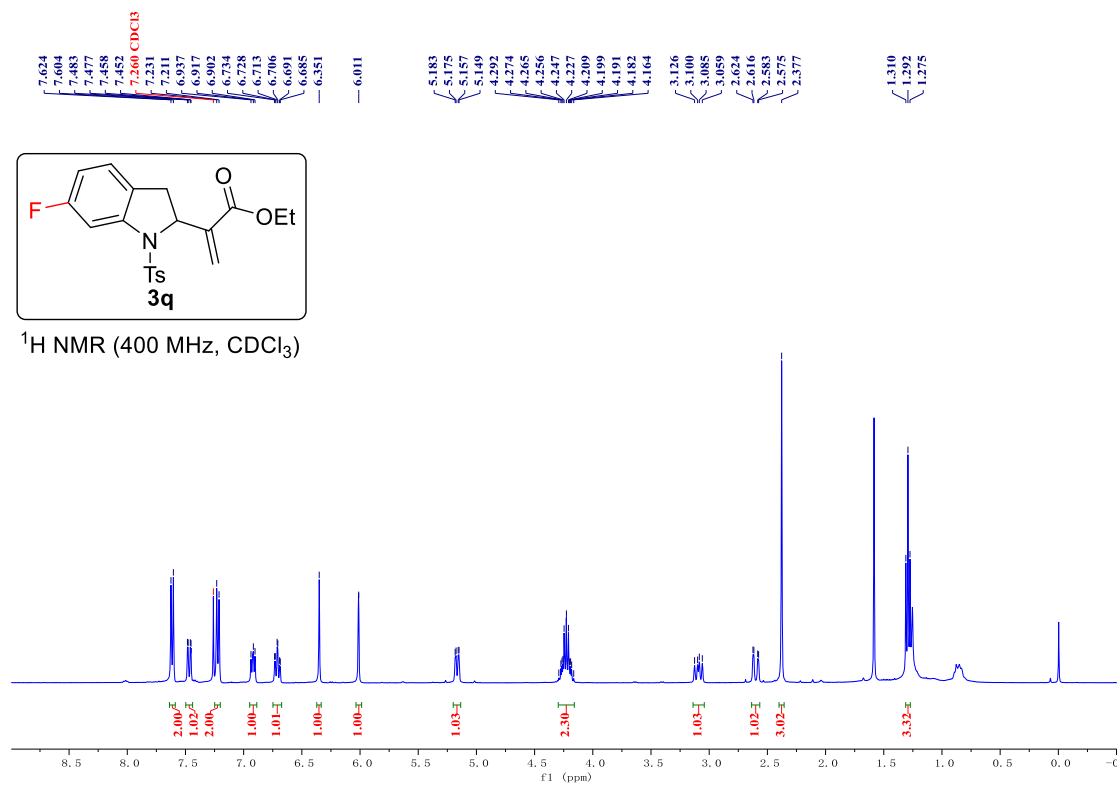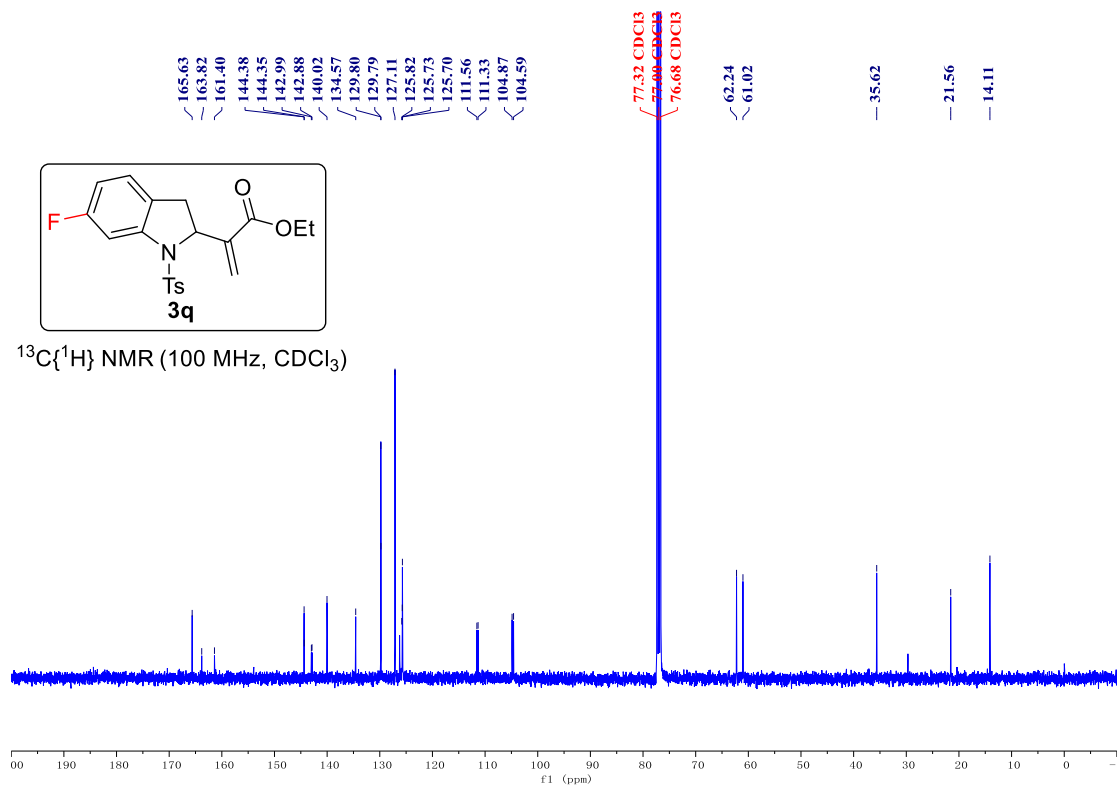

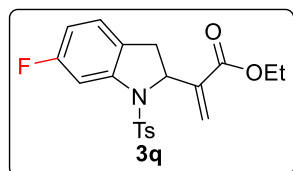

$^{19}\text{F}\{^1\text{H}\}$  NMR (376 MHz,  $\text{CDCl}_3$ )

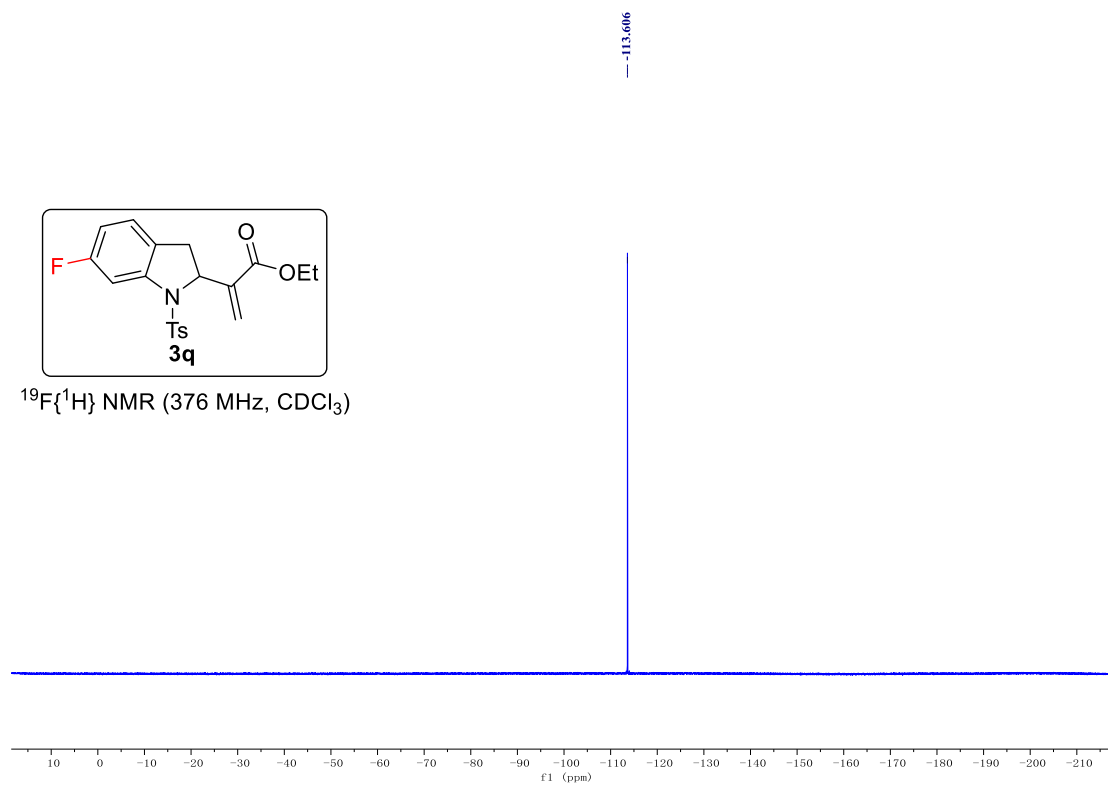

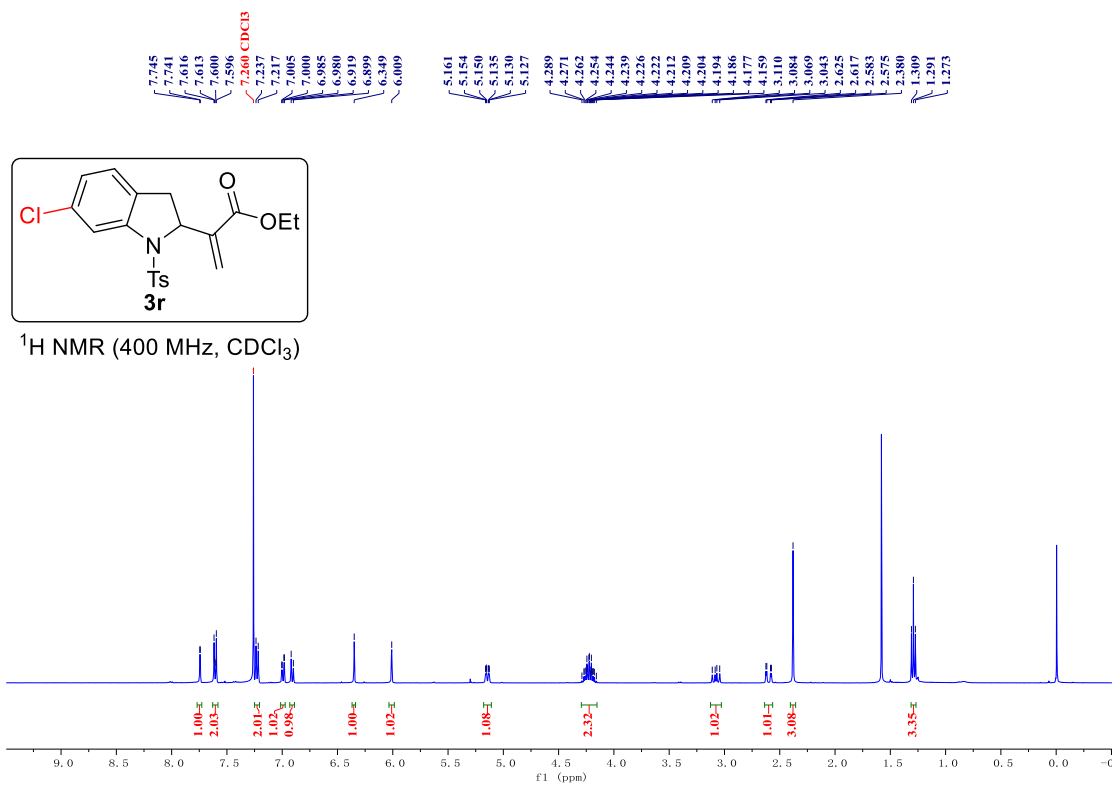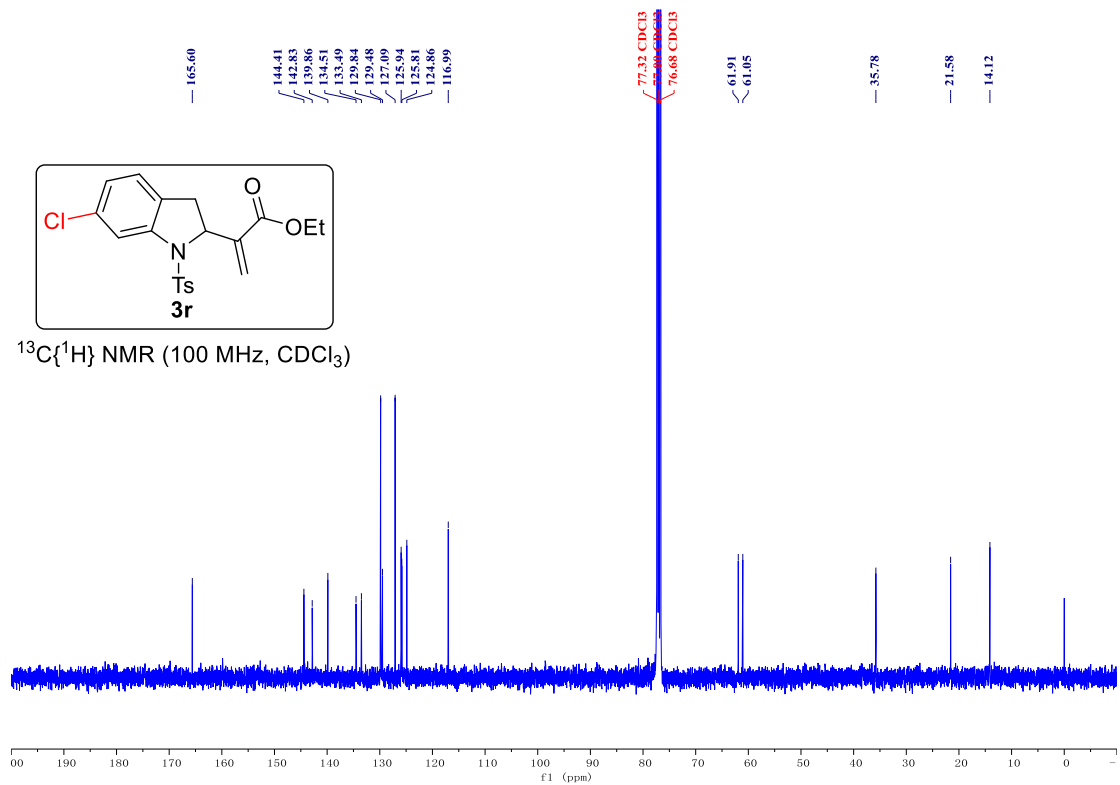

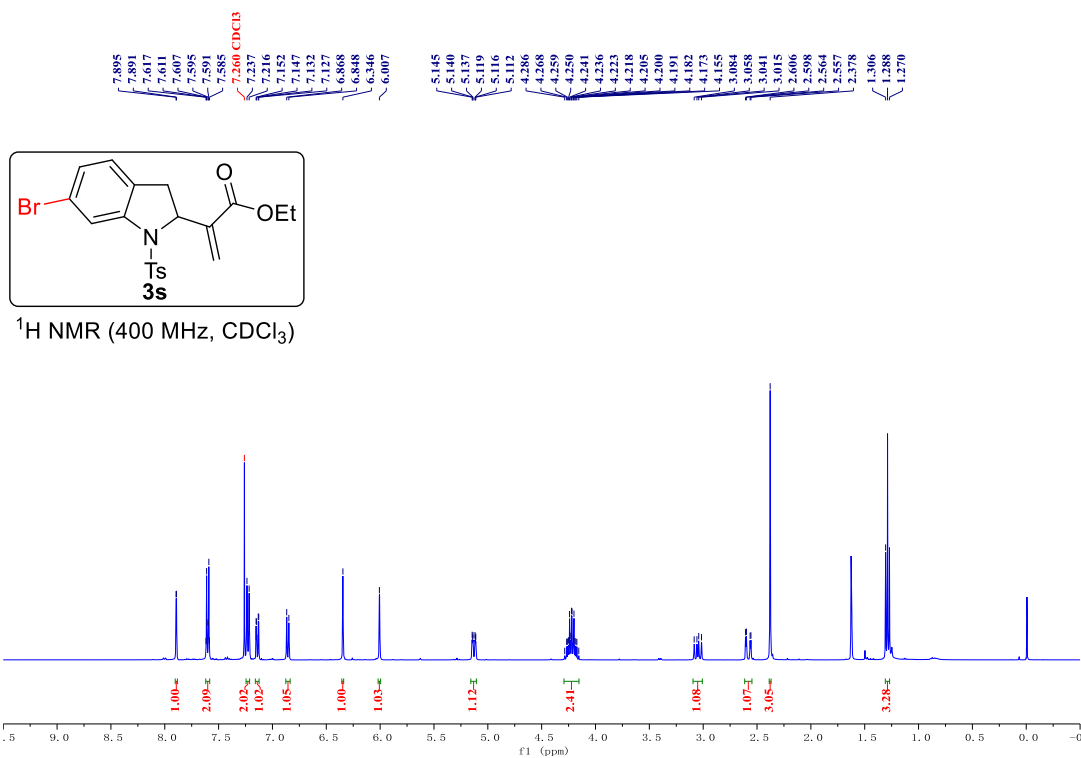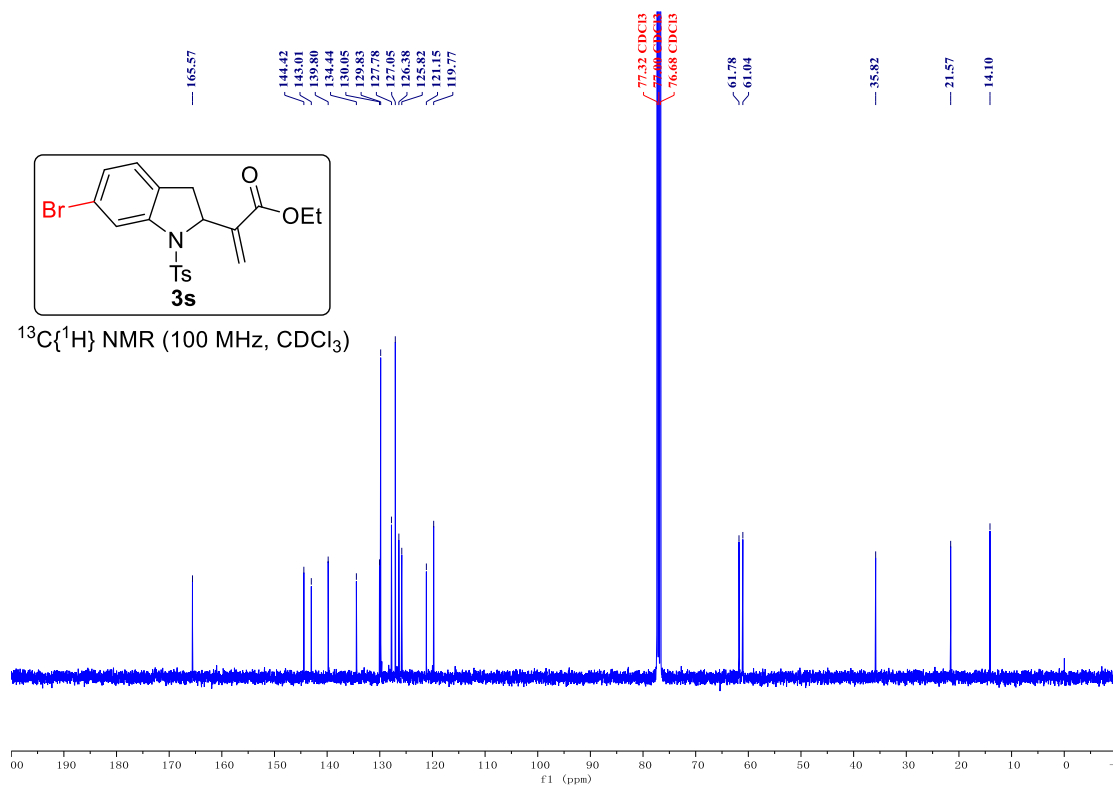

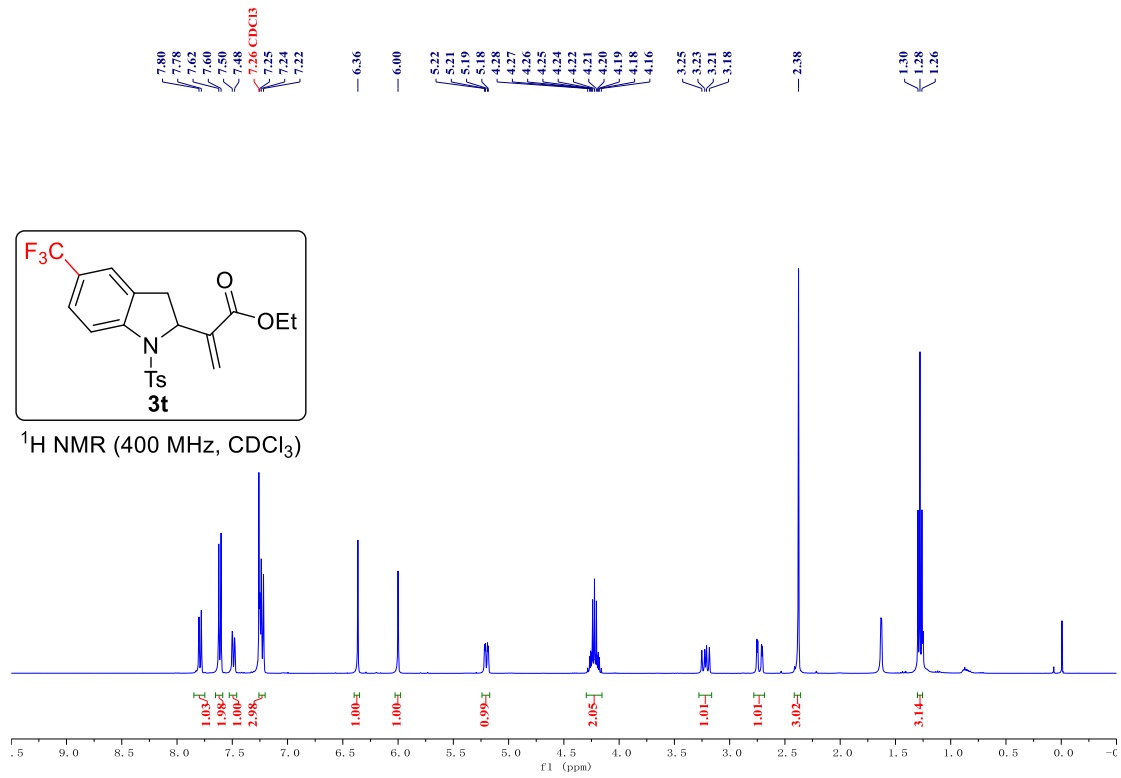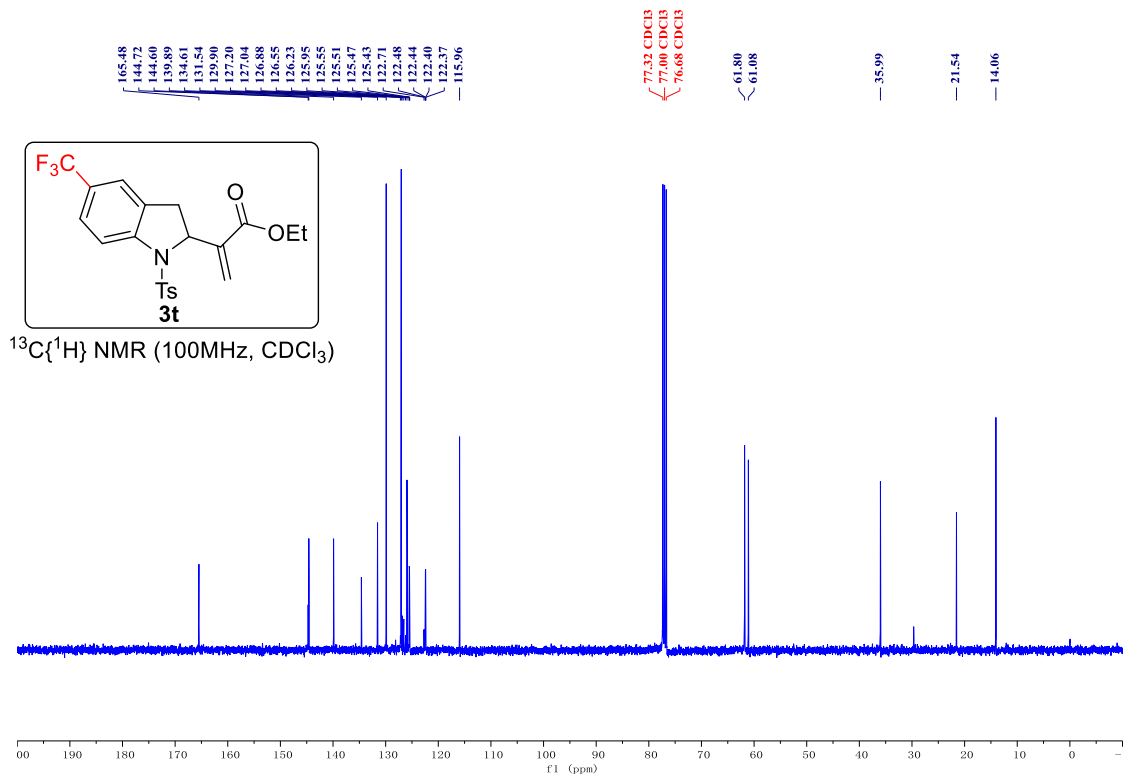

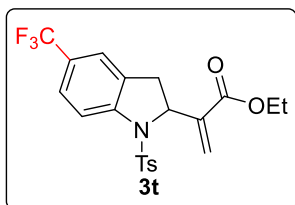

$^{19}F\{^1H\}$  NMR (376 MHz,  $CDCl_3$ )

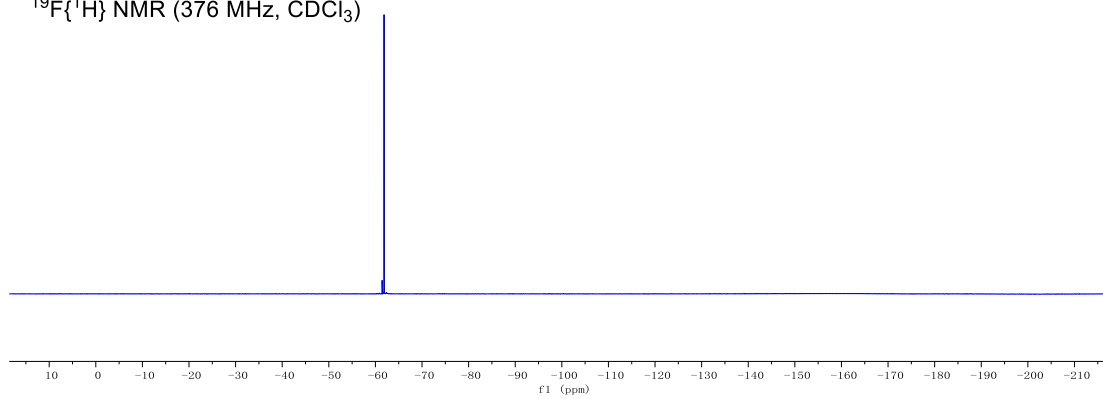

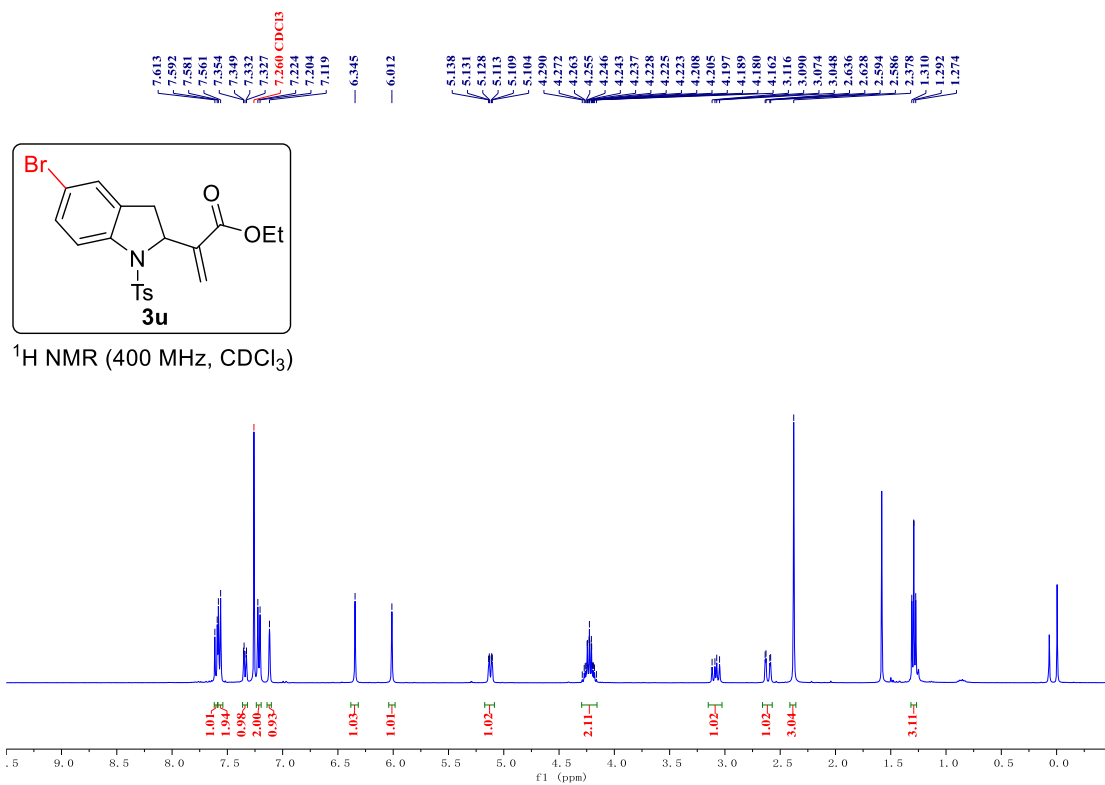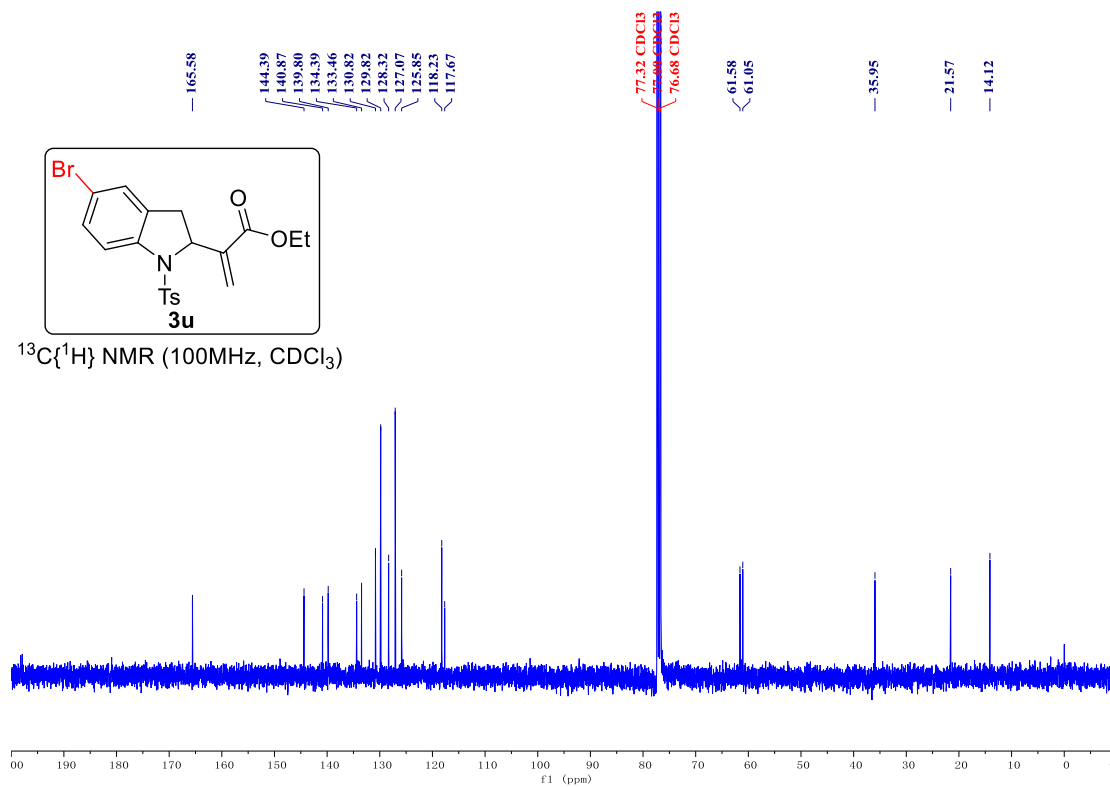



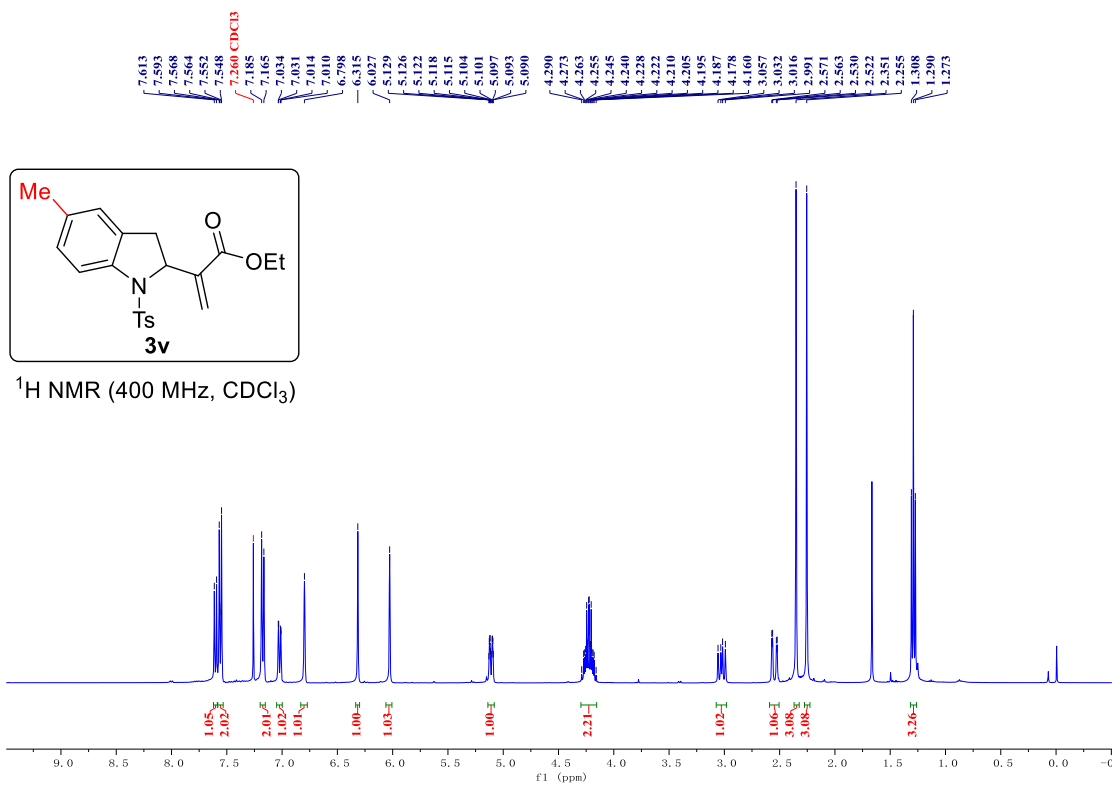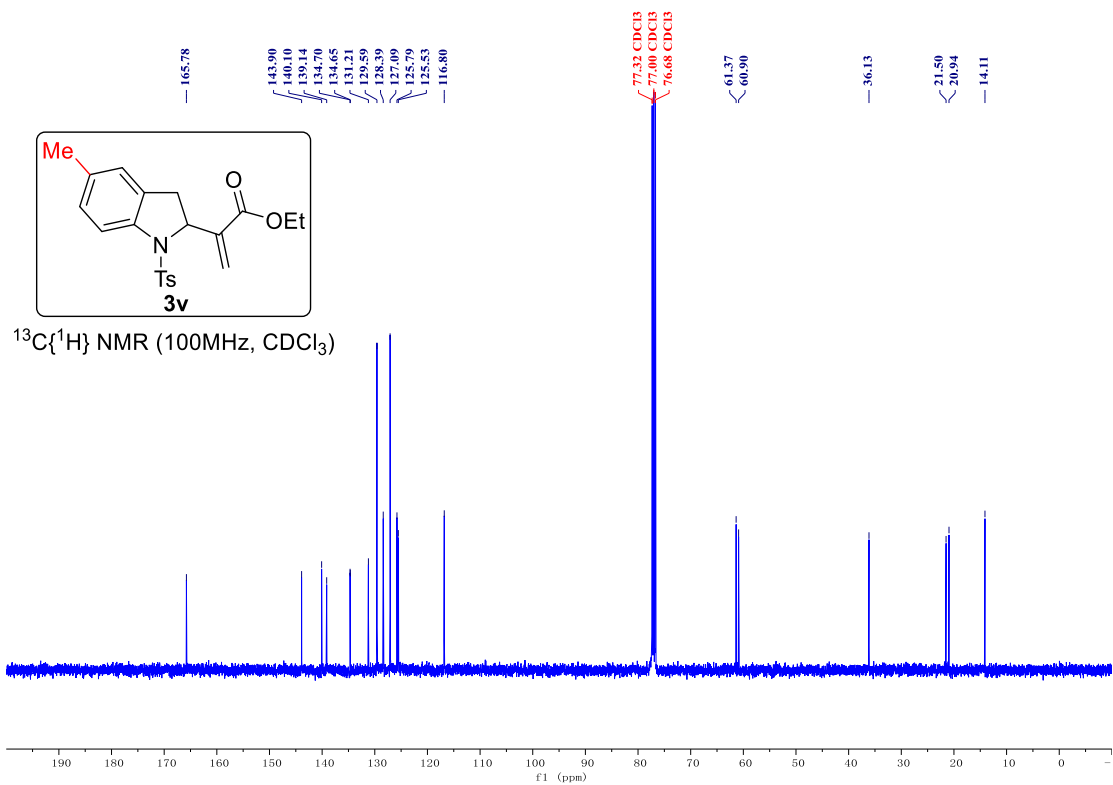

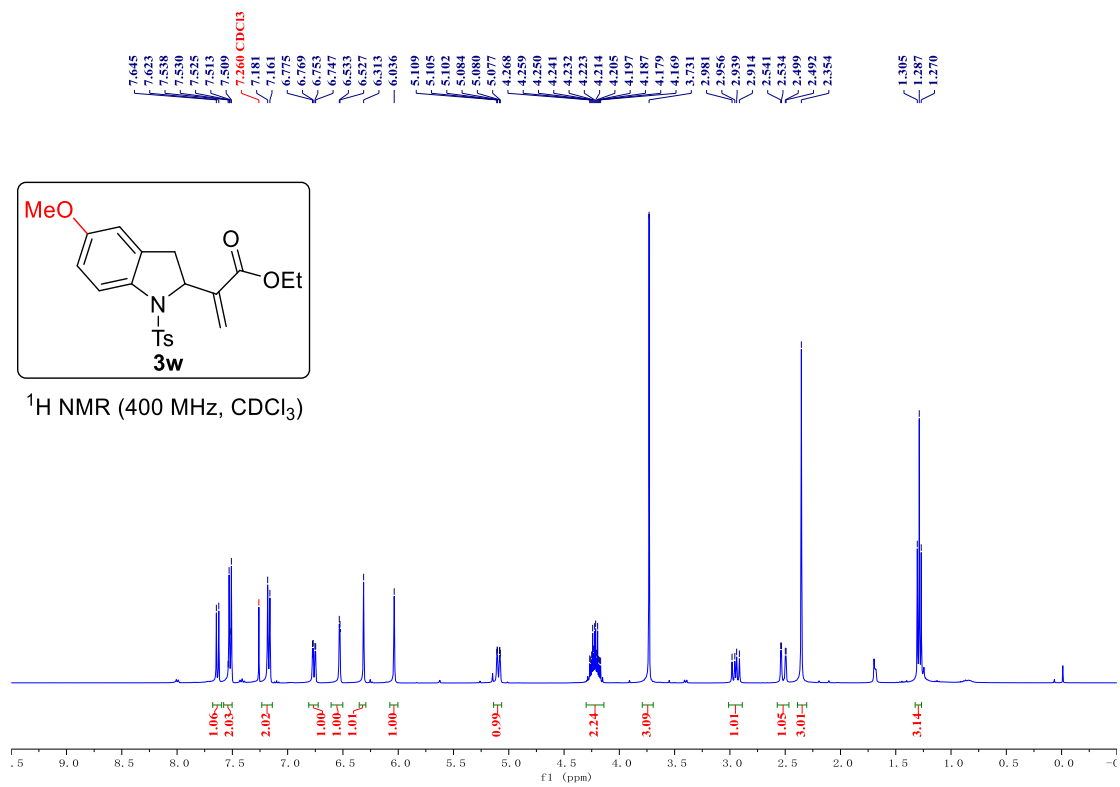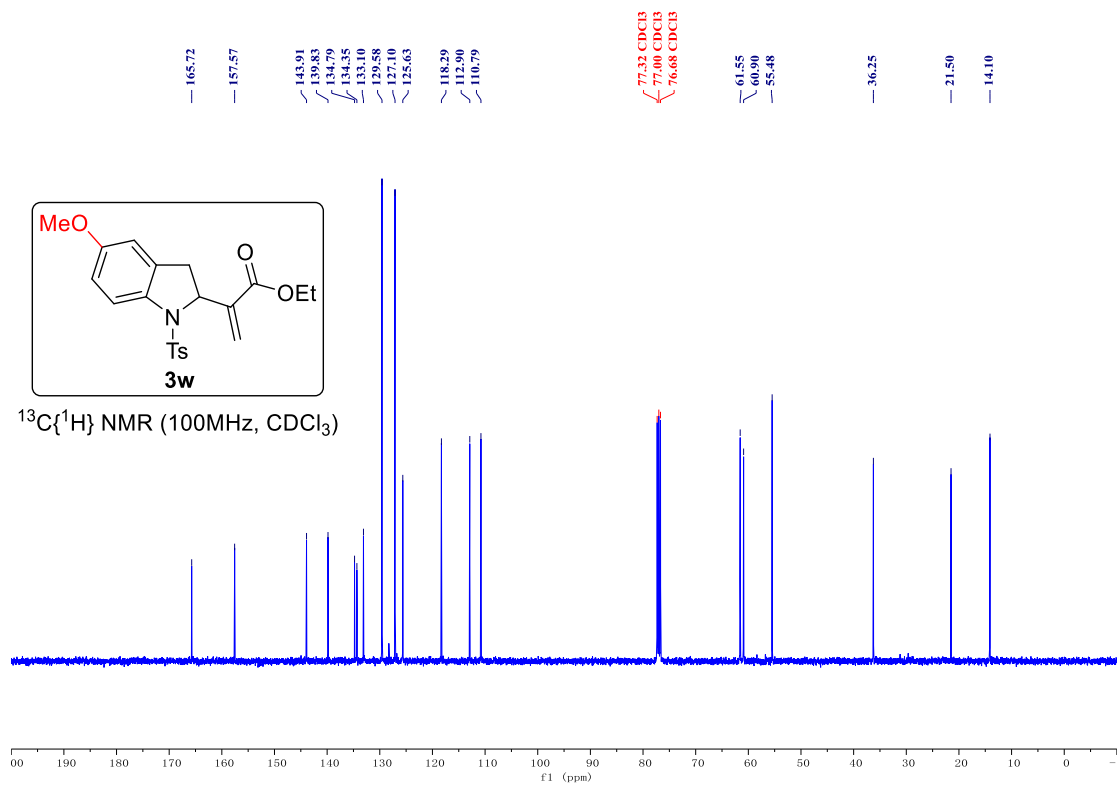

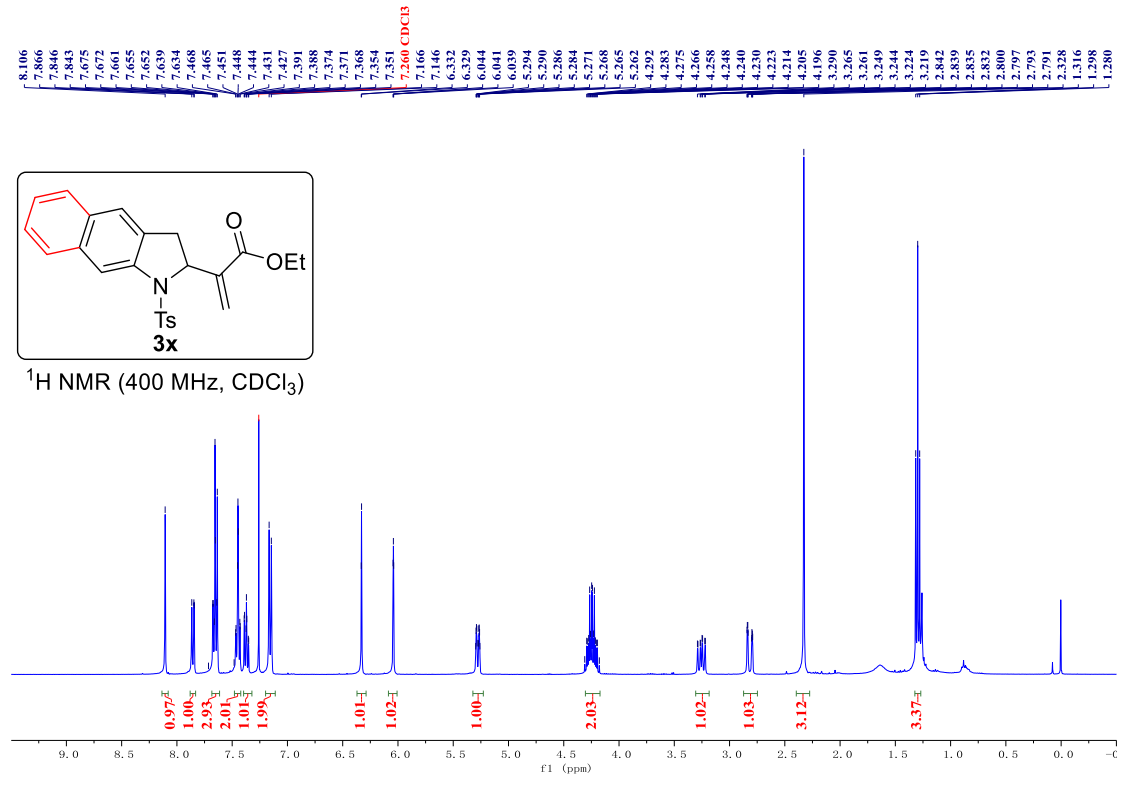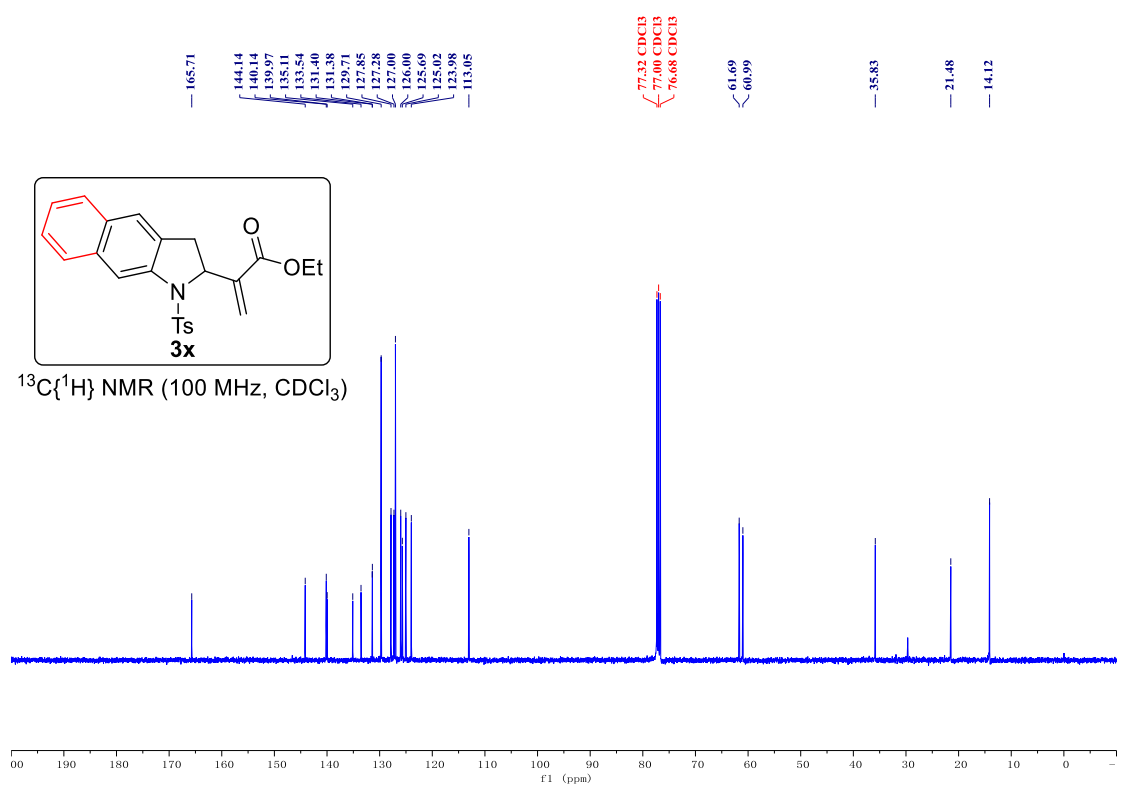

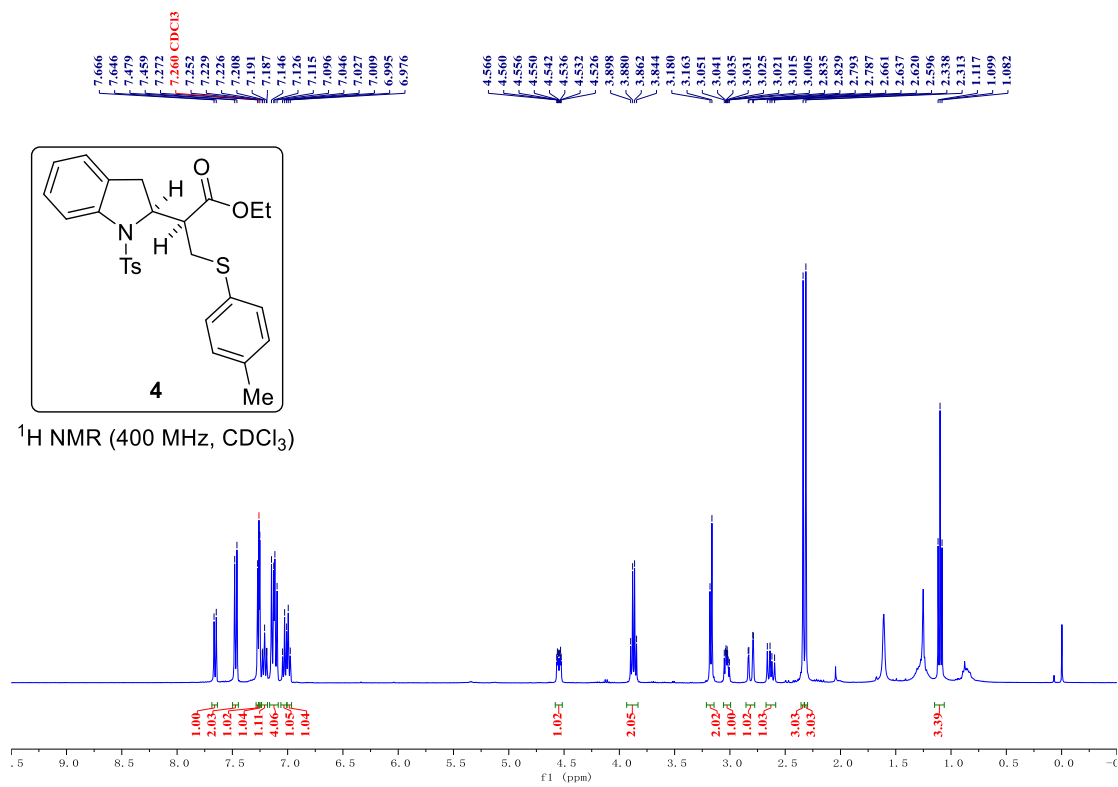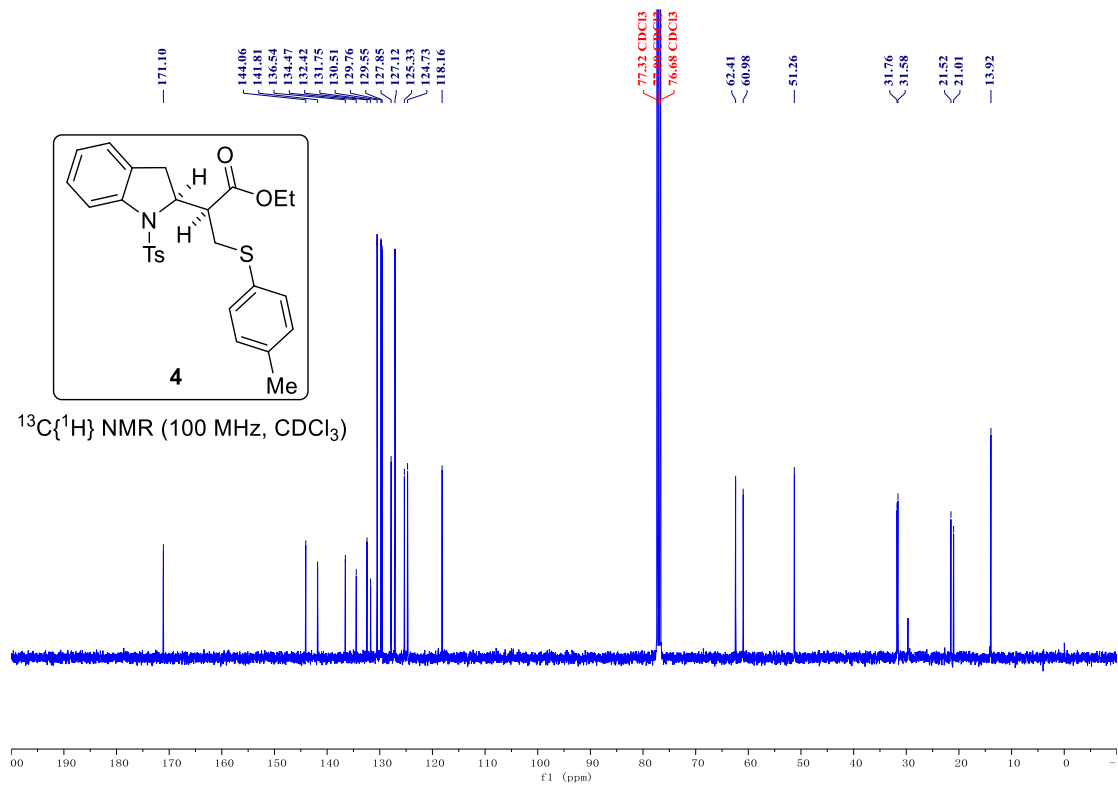

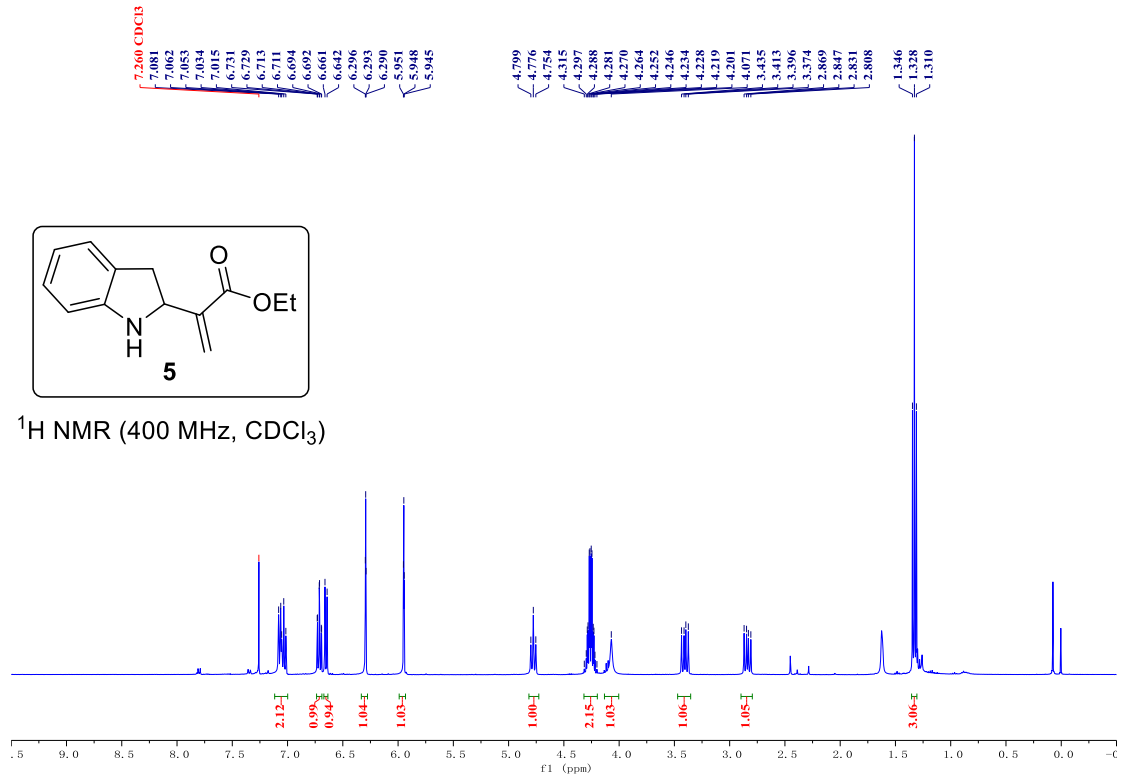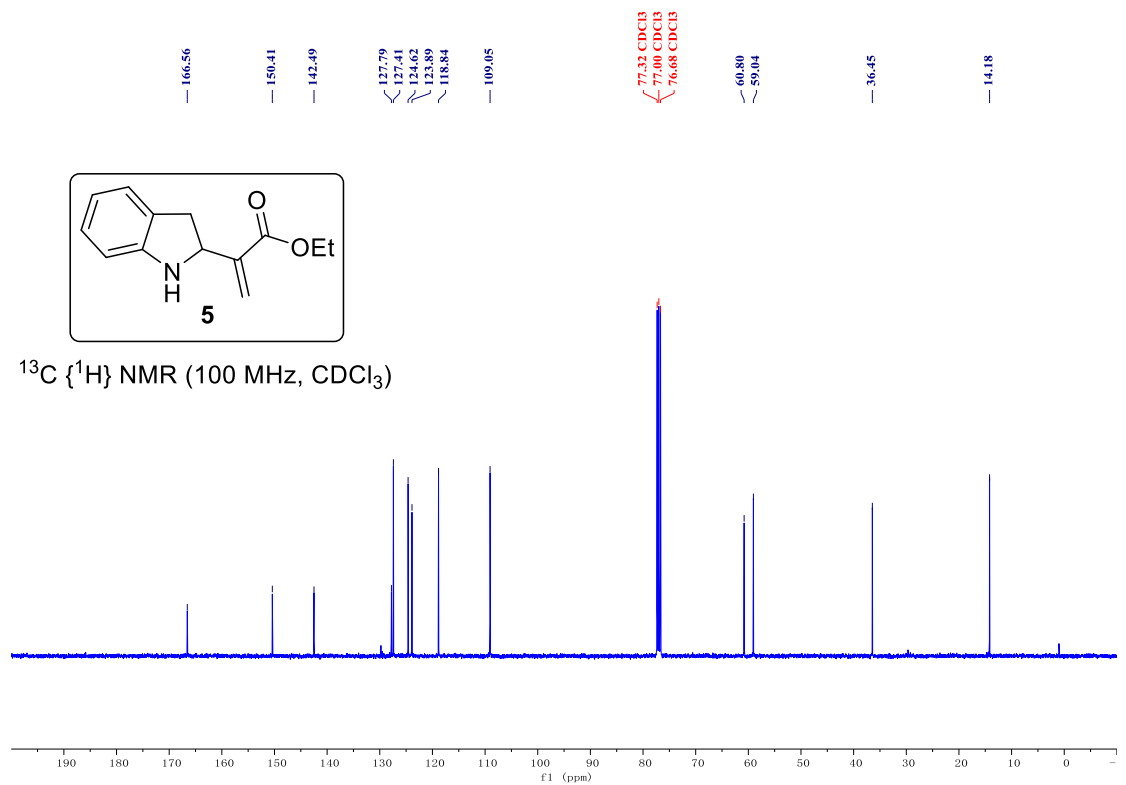

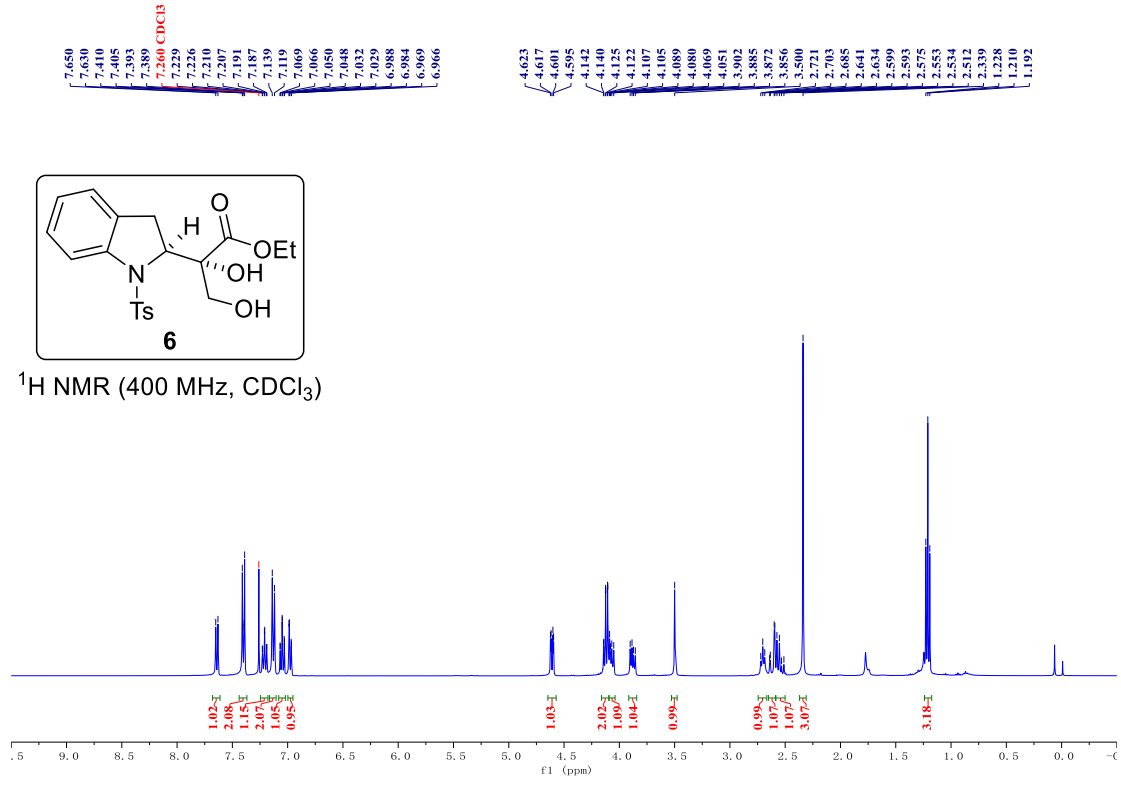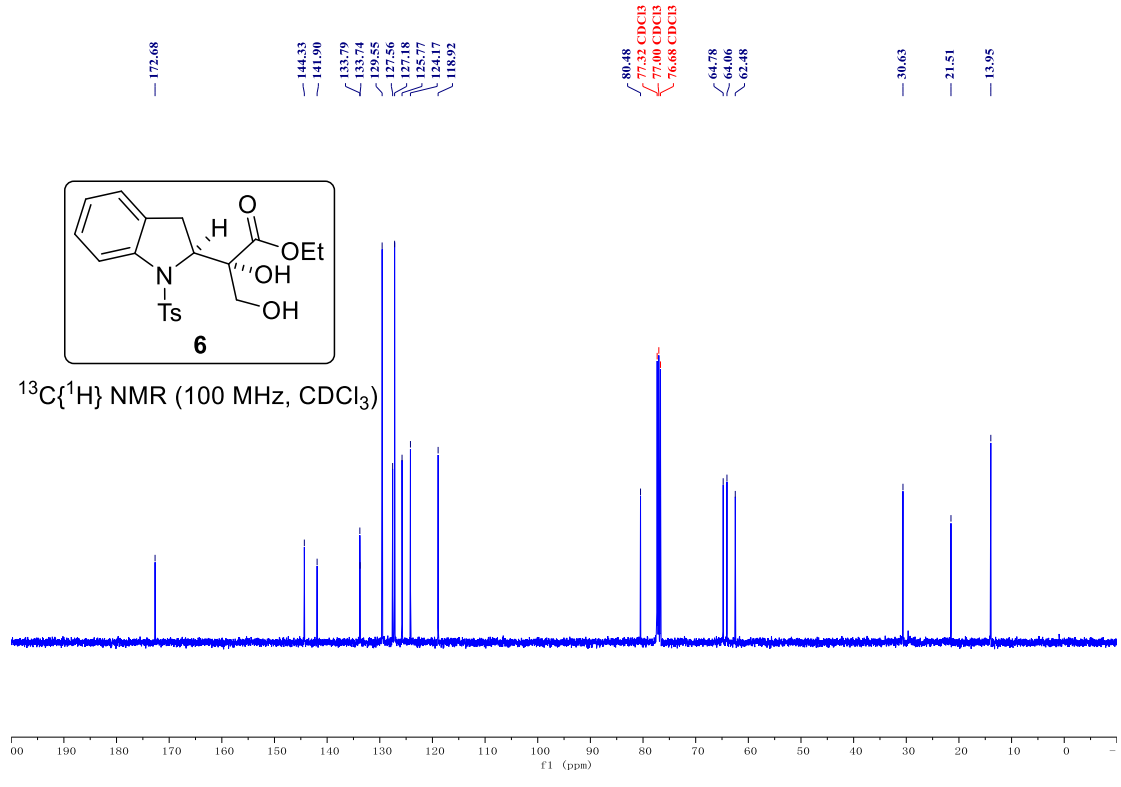

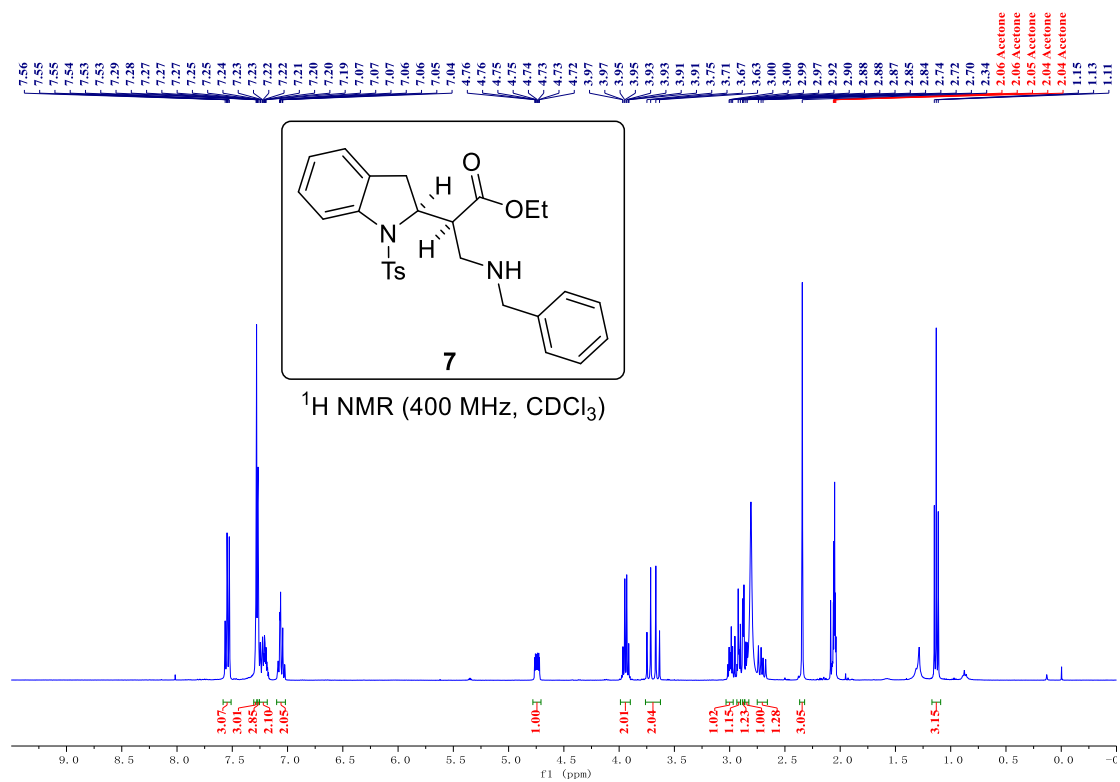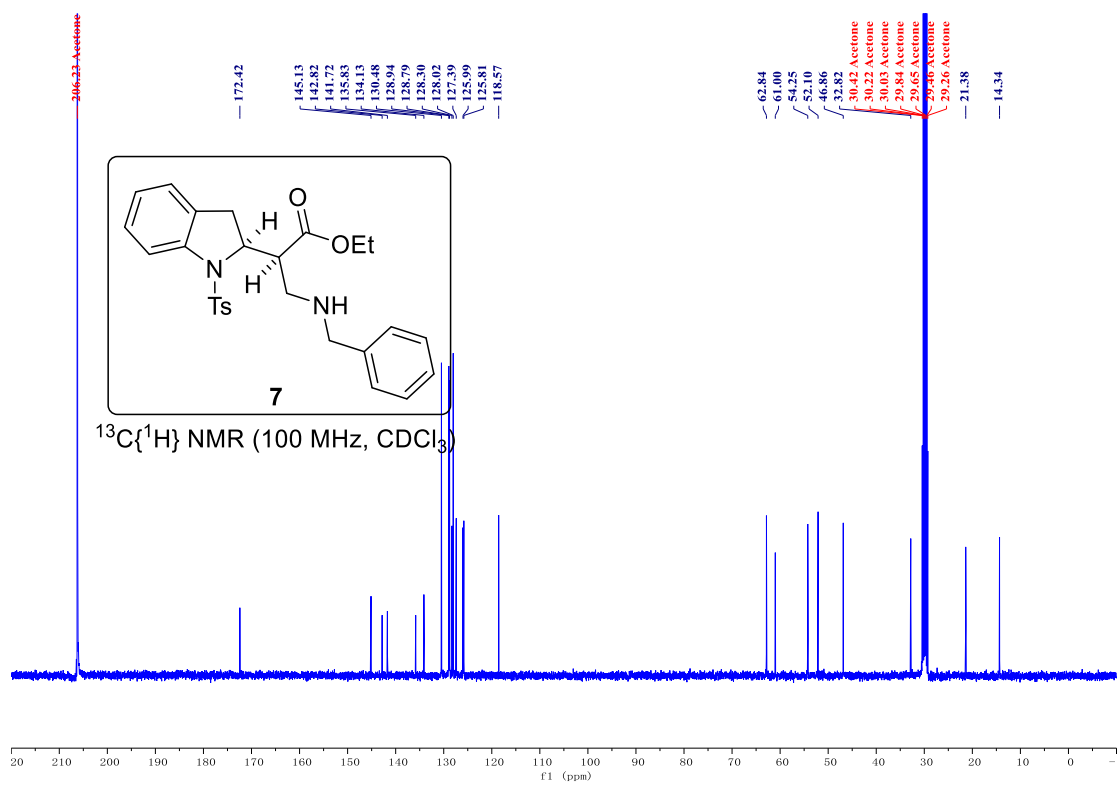

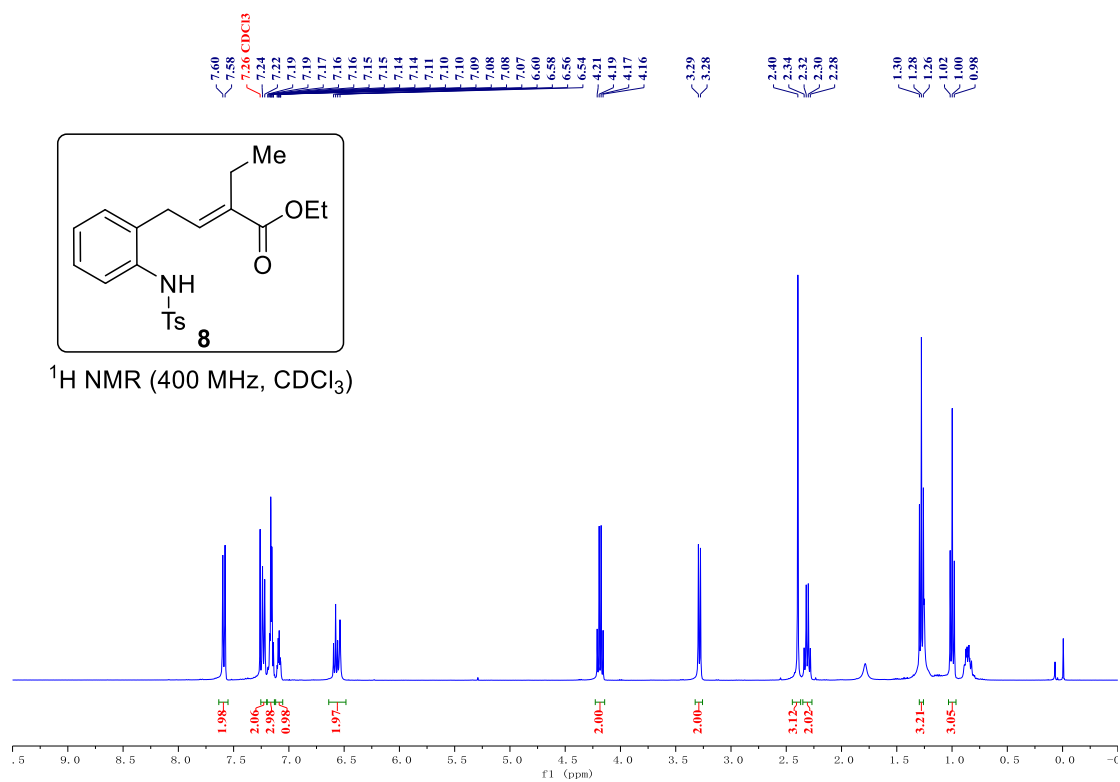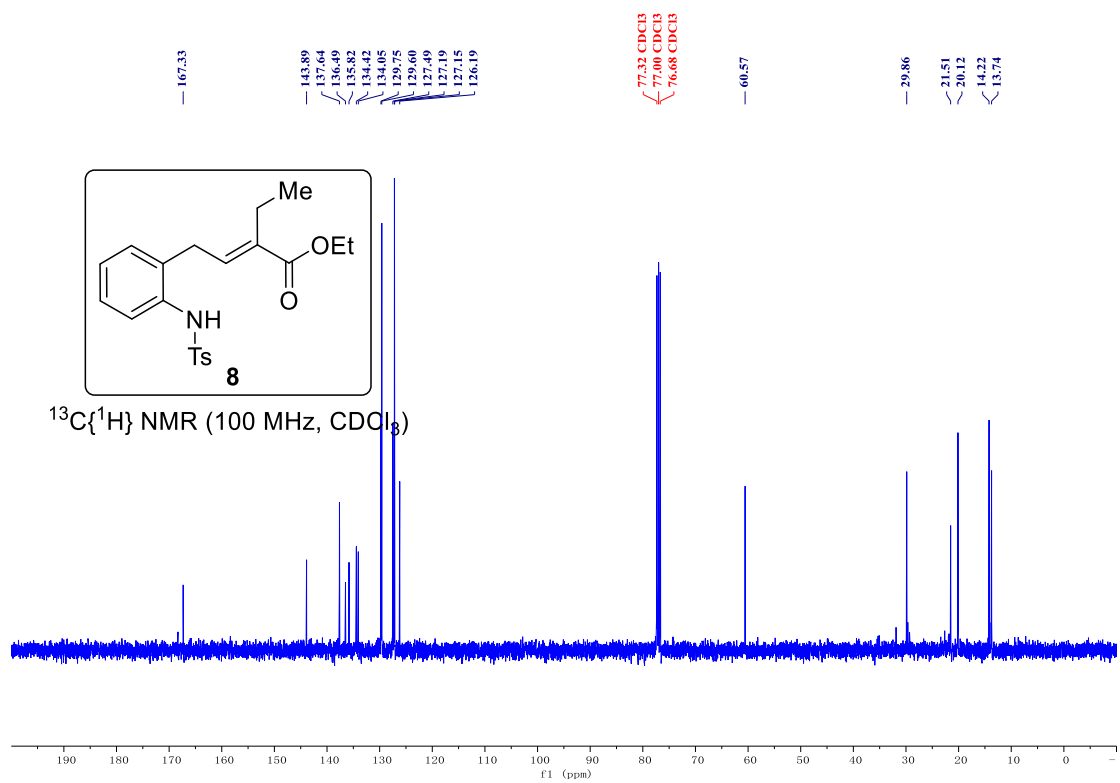



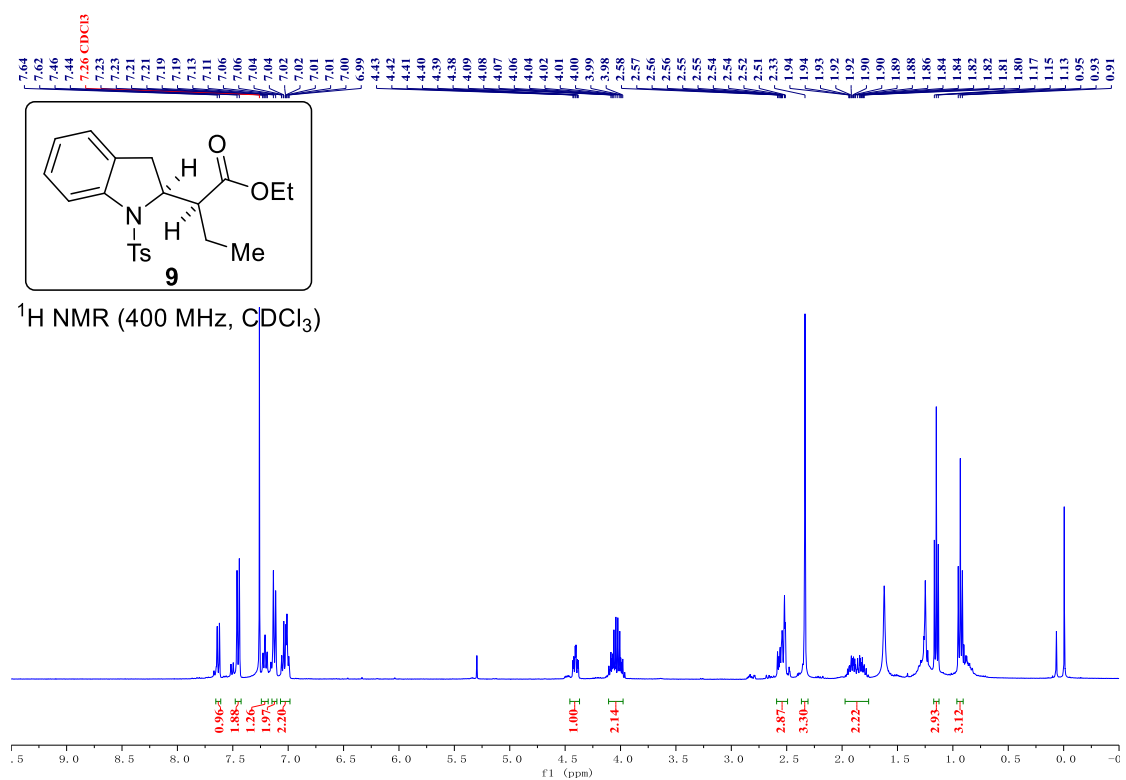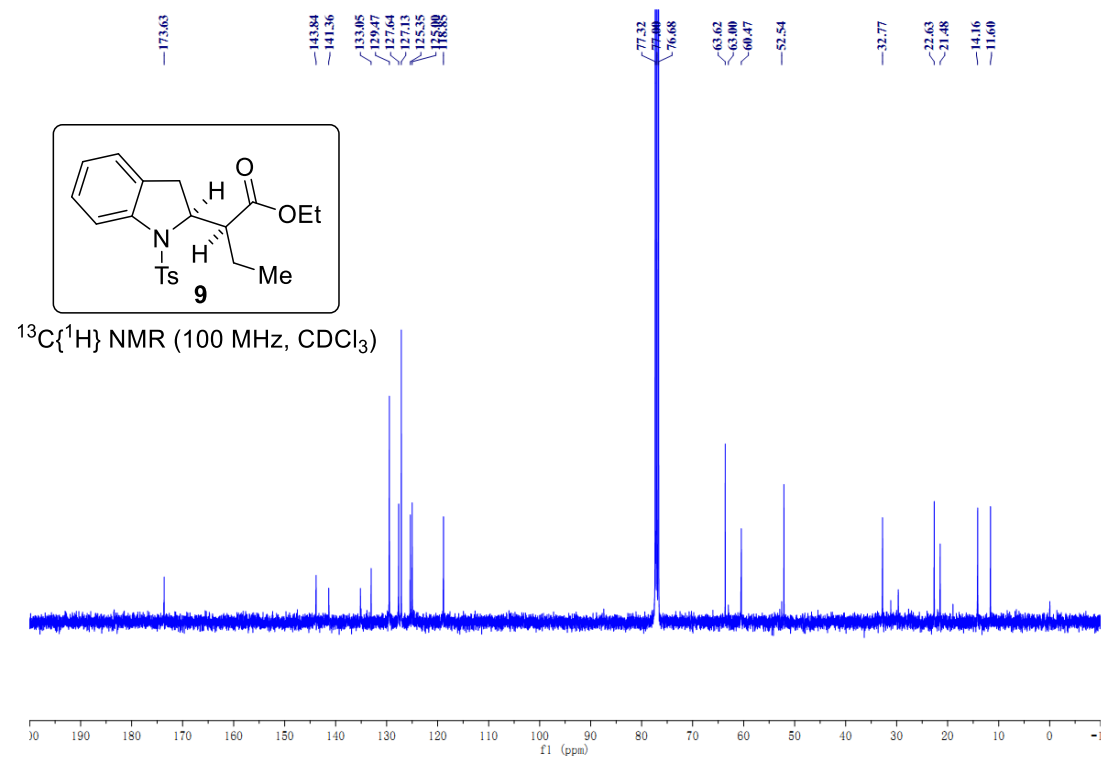

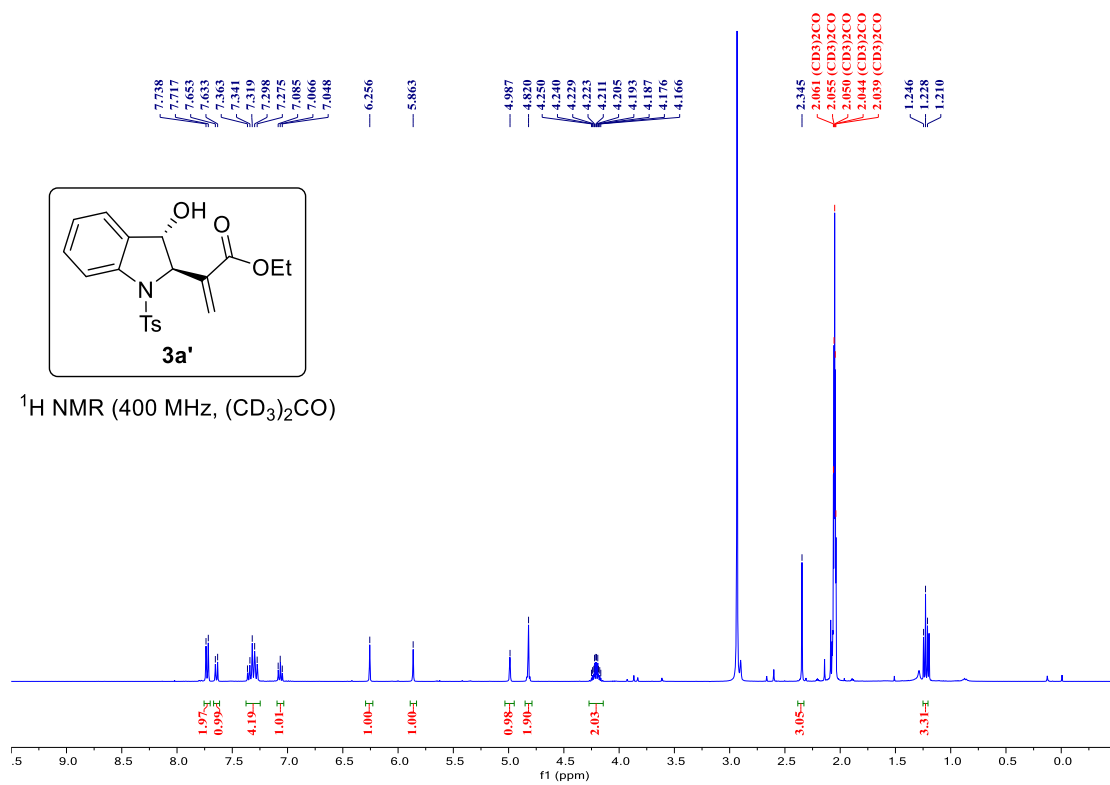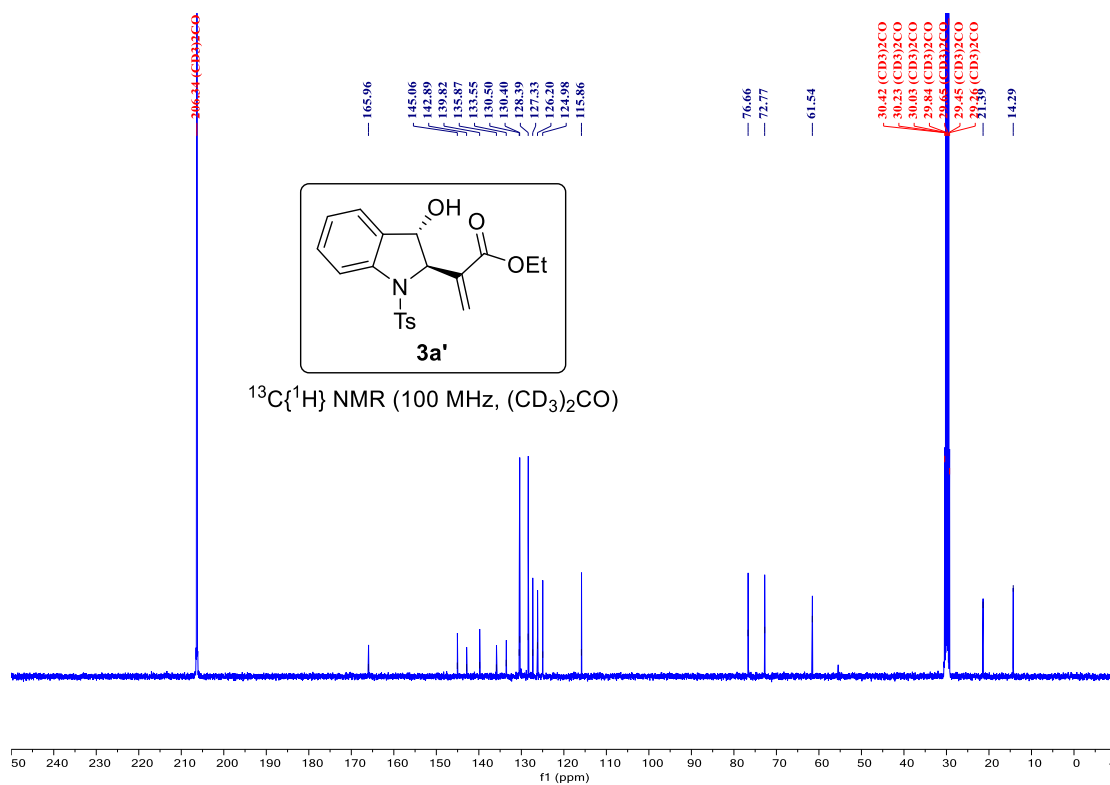

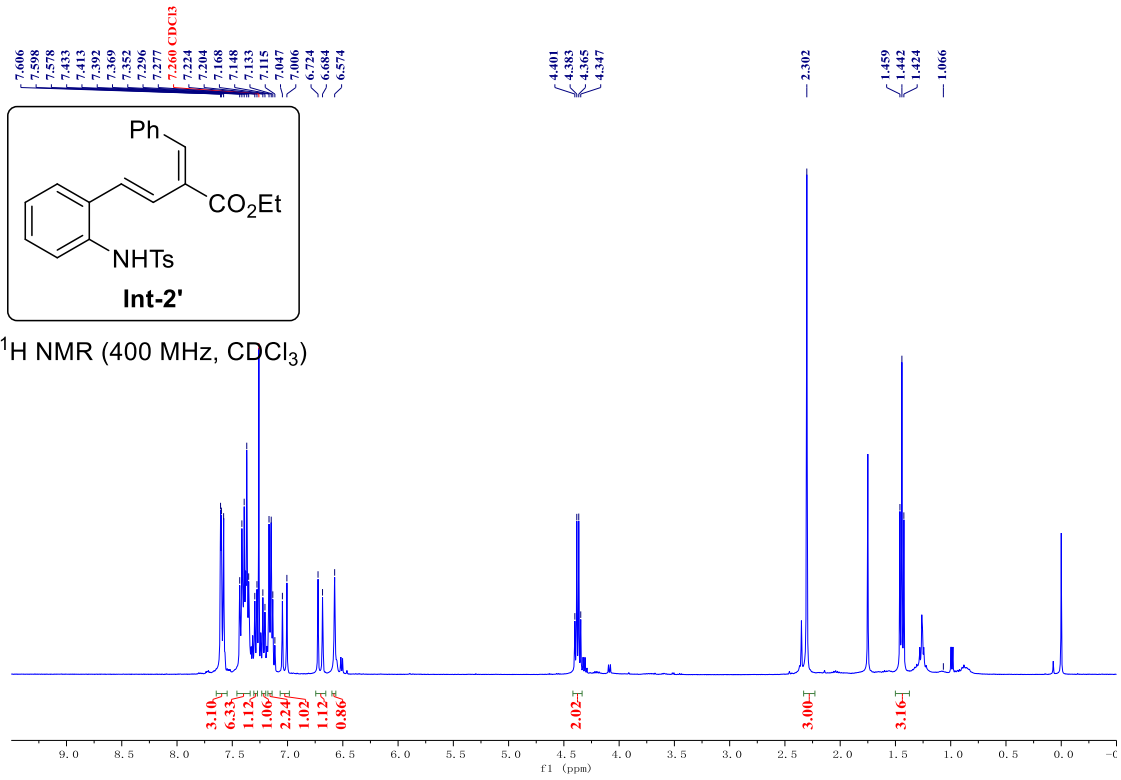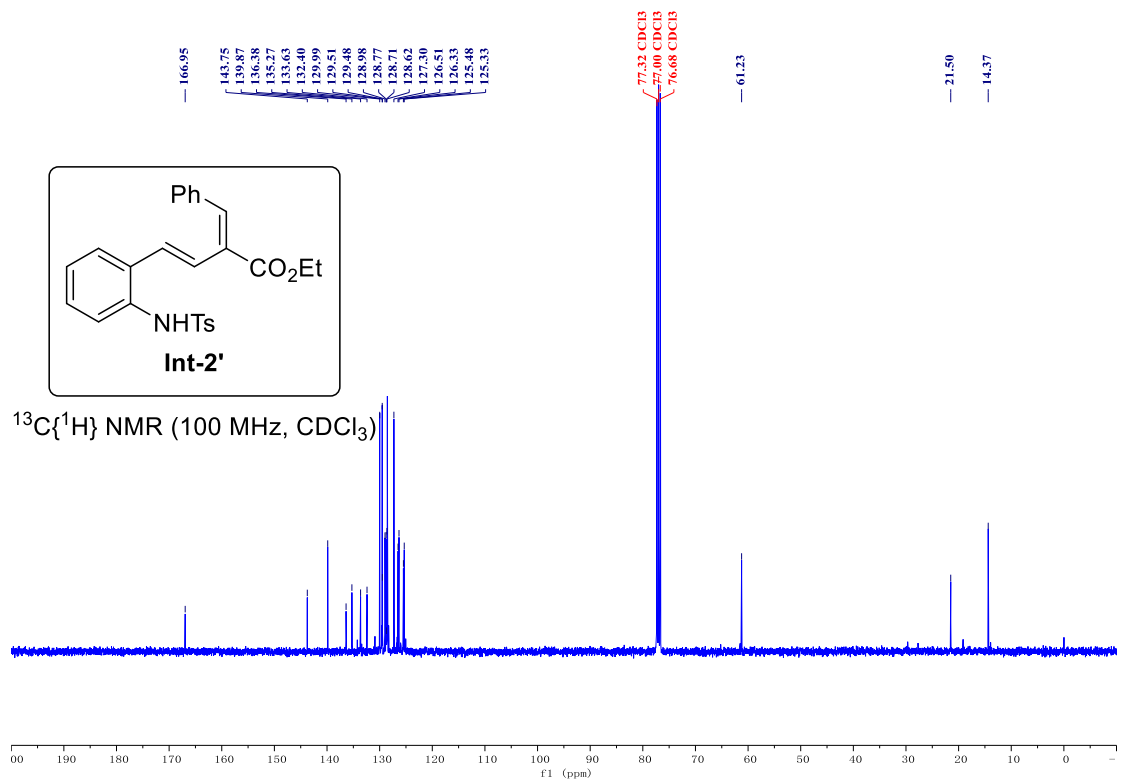

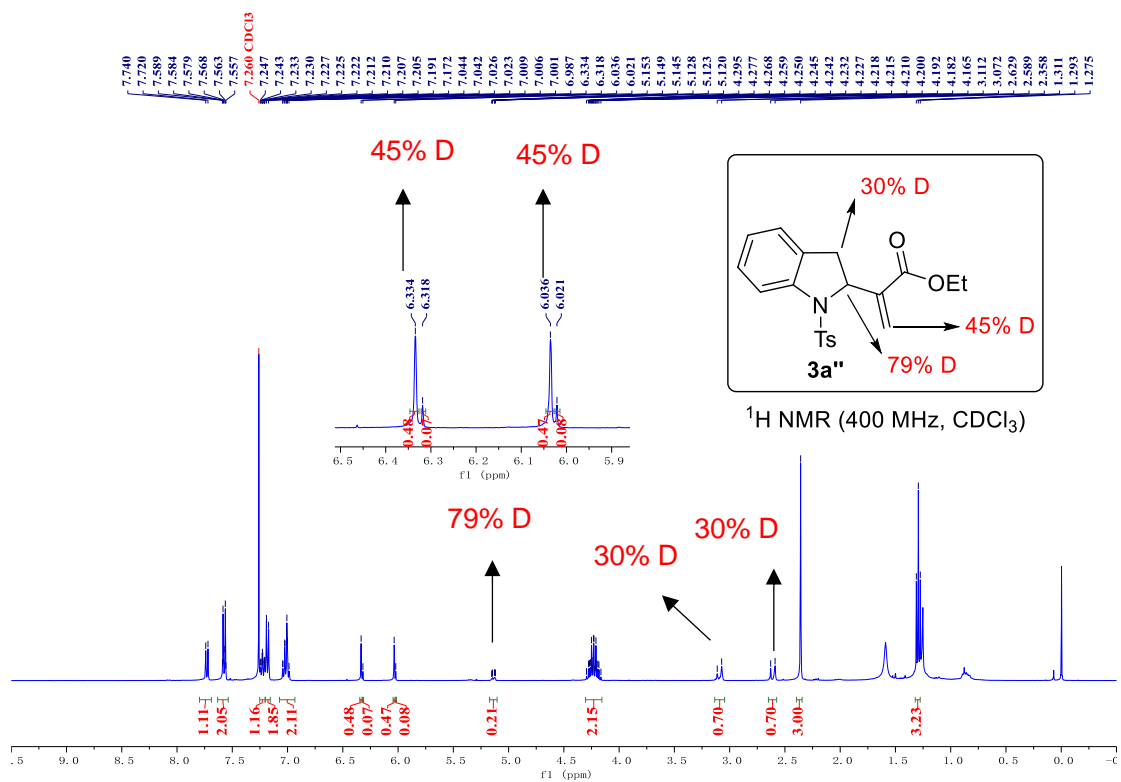

Supplement: d4cc01851f1.pdf [file d4cc01851f1.pdf]
